# Supplementary material for: Systematic Review of COVID-19-Related Physical Activity-Based Rehabilitations: Benefits to Be Confirmed by More Robust Methodological Approaches
Source: MDPI journal article supplement (doi:10.3390/ijerph19159025), 2022-07-25
Supplement: s1 [file s1]

**Supplementary Table S1:** Level of details provided by the included studies on the program of physical activity.

| Types of Exercises                                                            |  |                                                         |  | Frequency                                                                                     |  | Volume of sessions |  |                                                                            |  | Intensity of sessions |  |                                                                                            |  |         |  |
|-------------------------------------------------------------------------------|--|---------------------------------------------------------|--|-----------------------------------------------------------------------------------------------|--|--------------------|--|----------------------------------------------------------------------------|--|-----------------------|--|--------------------------------------------------------------------------------------------|--|---------|--|
| NR                                                                            |  | 0pt                                                     |  | NR                                                                                            |  | 0pt                |  | NR                                                                         |  | 0pt                   |  | NR                                                                                         |  | 0pt     |  |
| For all modalities only                                                       |  |                                                         |  |                                                                                               |  |                    |  | 1pt                                                                        |  |                       |  |                                                                                            |  |         |  |
| AEROBIC                                                                       |  | RESISTANCE                                              |  |                                                                                               |  | AEROBIC            |  | RESISTANCE                                                                 |  | AEROBIC               |  | RESISTANCE                                                                                 |  |         |  |
|                                                                               |  | Worked muscles<br>(e.g. lower limbs, abdominal muscles) |  | 2pt                                                                                           |  |                    |  | Total duration                                                             |  | 4pt                   |  | Total duration                                                                             |  | 1pt     |  |
| Activity only<br>(e.g. Walking)                                               |  | 2pt                                                     |  | Material used<br>(e.g. elastics, machines, free weight)                                       |  | 2pt                |  | Frequency for all modalities                                               |  | 2pt                   |  | Number of repetitions                                                                      |  | 2pt     |  |
|                                                                               |  |                                                         |  |                                                                                               |  |                    |  |                                                                            |  |                       |  | %HR <sub>max</sub> E or %WR <sub>max</sub> E                                               |  | 2pt     |  |
| RPE and/or Dyspnea                                                            |  | 2pt                                                     |  |                                                                                               |  |                    |  |                                                                            |  |                       |  |                                                                                            |  |         |  |
| Activity + Material/place<br>(e.g. Walking on a treadmill/on a plane surface) |  | 3pt                                                     |  | Type of exercises (e.g. squat, bench press)                                                   |  | 3pt                |  |                                                                            |  |                       |  | Number of repetitions + series                                                             |  | 3pt     |  |
|                                                                               |  |                                                         |  |                                                                                               |  |                    |  |                                                                            |  |                       |  | %HR <sub>max</sub> Real or %WR <sub>max</sub> Real (from a previous test)                  |  | 3pt     |  |
|                                                                               |  |                                                         |  |                                                                                               |  |                    |  |                                                                            |  |                       |  |                                                                                            |  |         |  |
| Activity + Modality<br>(e.g. HIIT or MICT walking)                            |  | 4pt                                                     |  |                                                                                               |  |                    |  | Number of repetitions + series + number of exercises and/or total duration |  | 4pt                   |  |                                                                                            |  | % of RM |  |
|                                                                               |  |                                                         |  |                                                                                               |  |                    |  |                                                                            |  |                       |  |                                                                                            |  |         |  |
| Activity + material/place + modality<br>(e.g. MICT walking on a treadmill)    |  | 5pt                                                     |  | Worked muscles and/or type of exercises + Material used<br>(e.g. bench press using a machine) |  | 5pt                |  | Total duration + Details on warm-up and/or cooling-down                    |  | 5pt                   |  | Number of repetitions + series + number of exercises and/or total duration + Recovery time |  | 5pt     |  |
|                                                                               |  |                                                         |  |                                                                                               |  |                    |  |                                                                            |  |                       |  |                                                                                            |  |         |  |
|                                                                               |  |                                                         |  |                                                                                               |  |                    |  |                                                                            |  |                       |  |                                                                                            |  |         |  |
|                                                                               |  |                                                         |  |                                                                                               |  |                    |  |                                                                            |  |                       |  |                                                                                            |  |         |  |
|                                                                               |  |                                                         |  |                                                                                               |  |                    |  |                                                                            |  |                       |  |                                                                                            |  |         |  |
|                                                                               |  |                                                         |  |                                                                                               |  |                    |  |                                                                            |  |                       |  |                                                                                            |  |         |  |
|                                                                               |  |                                                         |  |                                                                                               |  |                    |  |                                                                            |  |                       |  |                                                                                            |  |         |  |
|                                                                               |  |                                                         |  |                                                                                               |  |                    |  |                                                                            |  |                       |  |                                                                                            |  |         |  |
|                                                                               |  |                                                         |  |                                                                                               |  |                    |  |                                                                            |  |                       |  |                                                                                            |  |         |  |
|                                                                               |  |                                                         |  |                                                                                               |  |                    |  |                                                                            |  |                       |  |                                                                                            |  |         |  |
|                                                                               |  |                                                         |  |                                                                                               |  |                    |  |                                                                            |  |                       |  |                                                                                            |  |         |  |
|                                                                               |  |                                                         |  |                                                                                               |  |                    |  |                                                                            |  |                       |  |                                                                                            |  |         |  |
|                                                                               |  |                                                         |  |                                                                                               |  |                    |  |                                                                            |  |                       |  |                                                                                            |  |         |  |
|                                                                               |  |                                                         |  |                                                                                               |  |                    |  |                                                                            |  |                       |  |                                                                                            |  |         |  |
|                                                                               |  |                                                         |  |                                                                                               |  |                    |  |                                                                            |  |                       |  |                                                                                            |  |         |  |
|                                                                               |  |                                                         |  |                                                                                               |  |                    |  |                                                                            |  |                       |  |                                                                                            |  |         |  |
|                                                                               |  |                                                         |  |                                                                                               |  |                    |  |                                                                            |  |                       |  |                                                                                            |  |         |  |
|                                                                               |  |                                                         |  |                                                                                               |  |                    |  |                                                                            |  |                       |  |                                                                                            |  |         |  |
|                                                                               |  |                                                         |  |                                                                                               |  |                    |  |                                                                            |  |                       |  |                                                                                            |  |         |  |
|                                                                               |  |                                                         |  |                                                                                               |  |                    |  |                                                                            |  |                       |  |                                                                                            |  |         |  |
|                                                                               |  |                                                         |  |                                                                                               |  |                    |  |                                                                            |  |                       |  |                                                                                            |  |         |  |
|                                                                               |  |                                                         |  |                                                                                               |  |                    |  |                                                                            |  |                       |  |                                                                                            |  |         |  |
|                                                                               |  |                                                         |  |                                                                                               |  |                    |  |                                                                            |  |                       |  |                                                                                            |  |         |  |
|                                                                               |  |                                                         |  |                                                                                               |  |                    |  |                                                                            |  |                       |  |                                                                                            |  |         |  |
|                                                                               |  |                                                         |  |                                                                                               |  |                    |  |                                                                            |  |                       |  |                                                                                            |  |         |  |
|                                                                               |  |                                                         |  |                                                                                               |  |                    |  |                                                                            |  |                       |  |                                                                                            |  |         |  |
|                                                                               |  |                                                         |  |                                                                                               |  |                    |  |                                                                            |  |                       |  |                                                                                            |  |         |  |
|                                                                               |  |                                                         |  |                                                                                               |  |                    |  |                                                                            |  |                       |  |                                                                                            |  |         |  |
|                                                                               |  |                                                         |  |                                                                                               |  |                    |  |                                                                            |  |                       |  |                                                                                            |  |         |  |
|                                                                               |  |                                                         |  |                                                                                               |  |                    |  |                                                                            |  |                       |  |                                                                                            |  |         |  |
|                                                                               |  |                                                         |  |                                                                                               |  |                    |  |                                                                            |  |                       |  |                                                                                            |  |         |  |
|                                                                               |  |                                                         |  |                                                                                               |  |                    |  |                                                                            |  |                       |  |                                                                                            |  |         |  |
|                                                                               |  |                                                         |  |                                                                                               |  |                    |  |                                                                            |  |                       |  |                                                                                            |  |         |  |
|                                                                               |  |                                                         |  |                                                                                               |  |                    |  |                                                                            |  |                       |  |                                                                                            |  |         |  |
|                                                                               |  |                                                         |  |                                                                                               |  |                    |  |                                                                            |  |                       |  |                                                                                            |  |         |  |
|                                                                               |  |                                                         |  |                                                                                               |  |                    |  |                                                                            |  |                       |  |                                                                                            |  |         |  |
|                                                                               |  |                                                         |  |                                                                                               |  |                    |  |                                                                            |  |                       |  |                                                                                            |  |         |  |
|                                                                               |  |                                                         |  |                                                                                               |  |                    |  |                                                                            |  |                       |  |                                                                                            |  |         |  |
|                                                                               |  |                                                         |  |                                                                                               |  |                    |  |                                                                            |  |                       |  |                                                                                            |  |         |  |
|                                                                               |  |                                                         |  |                                                                                               |  |                    |  |                                                                            |  |                       |  |                                                                                            |  |         |  |
|                                                                               |  |                                                         |  |                                                                                               |  |                    |  |                                                                            |  |                       |  |                                                                                            |  |         |  |
|                                                                               |  |                                                         |  |                                                                                               |  |                    |  |                                                                            |  |                       |  |                                                                                            |  |         |  |
|                                                                               |  |                                                         |  |                                                                                               |  |                    |  |                                                                            |  |                       |  |                                                                                            |  |         |  |
|                                                                               |  |                                                         |  |                                                                                               |  |                    |  |                                                                            |  |                       |  |                                                                                            |  |         |  |
|                                                                               |  |                                                         |  |                                                                                               |  |                    |  |                                                                            |  |                       |  |                                                                                            |  |         |  |
|                                                                               |  |                                                         |  |                                                                                               |  |                    |  |                                                                            |  |                       |  |                                                                                            |  |         |  |
|                                                                               |  |                                                         |  |                                                                                               |  |                    |  |                                                                            |  |                       |  |                                                                                            |  |         |  |
|                                                                               |  |                                                         |  |                                                                                               |  |                    |  |                                                                            |  |                       |  |                                                                                            |  |         |  |
|                                                                               |  |                                                         |  |                                                                                               |  |                    |  |                                                                            |  |                       |  |                                                                                            |  |         |  |
|                                                                               |  |                                                         |  |                                                                                               |  |                    |  |                                                                            |  |                       |  |                                                                                            |  |         |  |
|                                                                               |  |                                                         |  |                                                                                               |  |                    |  |                                                                            |  |                       |  |                                                                                            |  |         |  |
|                                                                               |  |                                                         |  |                                                                                               |  |                    |  |                                                                            |  |                       |  |                                                                                            |  |         |  |

The higher mark on each subscore is retained for the total score calculation (subscores not cumulative). HIIT: High Intensity Interval Training, HR<sub>max</sub>: maximal Heart Rate, HR<sub>max</sub>E: Estimated maximal Heart Rate, MICT: Moderate Intensity Continuous Training, NR: Not Reported, pt: points, RM: Repetition Maxima, RPE: Rated Perceived Exertion, WR<sub>max</sub>: maximal Work Rate, WR<sub>max</sub>E: Estimated maximal Work Rate.

**Supplementary Table S2:** Designs of the studies, characteristics of the population, description of the intervention, and method used in the included studies.

| Reference                       | Design of the study                                                                                                                         | Characteristics of the population (n; age; BMI) and comorbidities                                                                                                                                                                                                                                                                 | Severity of COVID-19 during the acute phase and duration of hospitalization/symptoms (low severity: no hospitalization; moderate severity: hospitalization; high severity: hospitalization and intensive care)                                                                   | Start of the rehabilitation program                                                                       | Rehabilitation interventions                                                                                                                                                                    | Physical activity program                                                                                                                                                                                                                                                                                                                                                                | Parameters assessed pre- and post-rehabilitation (detailed only when available results)                                                                                                                                                                                                                                                                                                                                                                                                                                                                                           |
|---------------------------------|---------------------------------------------------------------------------------------------------------------------------------------------|-----------------------------------------------------------------------------------------------------------------------------------------------------------------------------------------------------------------------------------------------------------------------------------------------------------------------------------|----------------------------------------------------------------------------------------------------------------------------------------------------------------------------------------------------------------------------------------------------------------------------------|-----------------------------------------------------------------------------------------------------------|-------------------------------------------------------------------------------------------------------------------------------------------------------------------------------------------------|------------------------------------------------------------------------------------------------------------------------------------------------------------------------------------------------------------------------------------------------------------------------------------------------------------------------------------------------------------------------------------------|-----------------------------------------------------------------------------------------------------------------------------------------------------------------------------------------------------------------------------------------------------------------------------------------------------------------------------------------------------------------------------------------------------------------------------------------------------------------------------------------------------------------------------------------------------------------------------------|
| Al Chikhanie et al., 2021 [35]  | Retrospective<br>Two groups                                                                                                                 | COV+ (post-ICU):<br>n=21 (14f, 7m);<br>70.9±10.6 yo;<br>26.9±5.4 kg/m <sup>2</sup><br>At least 1 comorbidity/subject among its: CVD, DM, cancer or obesity<br><br>COV- (post-ICU):<br>n=21 (13f, 8m);<br>69.1±9.4 yo; 24.7±7.2 kg/m <sup>2</sup><br>COPD (n=15),<br>Stroke, cirrhosis or CVD (n=6)                                | <b>High</b><br>ICU:<br>- COV+ (n=21): 23.4±8.5 days<br>- COV- (n=21): 16.2±26.9 days<br>Intubation:<br>- COV+ (n=16): 22.3±5.7 days<br>- COV- (n=6): 1.6±2.9 days<br><br>Groups comparison: significant differences for number of intubated (p<0.05) and days intubated (p<0.05) | Duration between extubation and RP: range: 3-45 days                                                      | In hospital (rehabilitation center)<br><br>Physical activity, respiratory exercises<br><br>Duration:<br>- COV+: 27.6±14.2 days<br>- COV-: 29.9±17.3 days                                        | Modality: aerobic<br>Type: walking, cycling<br>Frequency: NR<br>Volume: NR<br>Intensity: NR<br><br>Modality: resistance, balance<br>Type: gymnastic<br>Frequency: NR<br>Volume: NR<br>Intensity: NR                                                                                                                                                                                      | <u>Functional capacity:</u><br>6MWT, Handgrip, Quadriceps isometric, Balance (Tinetti test)<br><br><u>Respiratory function:</u><br>FEV1 and FVC (method NR), Need for oxygen therapy, PI <sub>max</sub> and PE <sub>max</sub> (method NR), Dyspnea post-6MWT (Borg scale, probably 0-10), SaO <sub>2min</sub> during 6MWT<br><br><u>Quality of life, mental health, and general state:</u><br>QoL (Saint George respiratory questionnaire), Anxiety and depression (HADS), Post-traumatic stress (Post-traumatic stress disorder checklist scale), Fatigue (Pichot questionnaire) |
| Bernal-Utrera et al., 2021 [36] | Prospective<br>Controlled trial, initially two interventional groups and one control group, but only results from the interventional groups | COV+:<br>n=25 (18f, 7m);<br>41.4±13.4 yo; NR<br>No comorbidity<br><br>Some patients performed the toning exercises program and some patients performed respiratory program (2 groups), but unseparated results and no further details on how many patients performed each program - Protocol article (Gonzalez-Gerez et al. 2020) | <b>Low</b><br>No hospitalization/very mild symptoms                                                                                                                                                                                                                              | During the acute phase (time period that patients diagnosed with COVID-19 were obligated to stay at home) | Telerehabilitation (no-supervised)<br><br>Physical activity, respiratory exercises<br><br>Duration: 14 days, but higher duration for some patients who needed to continue with the intervention | Modality: NR<br>Type: 10 toning exercises (no further information)<br>Frequency: NR<br>Volume: NR<br>Intensity: NR                                                                                                                                                                                                                                                                       | <u>Functional capacity:</u><br>6MWT (assessments every day by the patient himself at home), 30-s STST, RPE during 6MWT and 30-s STST (Borg scale, type NR)<br>Semi-structured interviews<br><br><u>Respiratory function:</u><br>FEV1 and PEF (spirometry, assessments every day by the patient himself), Dyspnea post-6MWT (Multidimensional Dyspnea-12 questionnaire - Spanish version)<br>Semi-structured interviews<br><br><u>Quality of life, mental health, and general state:</u><br>Fatigue (Fatigue VAS)<br>Semi-structured interviews                                    |
| Bertolucci et al., 2021 [37]    | Prospective<br>Single group                                                                                                                 | COV+:<br>n=39 (15f, 24m);<br>67.8±10.8 yo; NR<br>Obesity (n=14), DM (n=10), No comorbidity (n=14)<br>CIRS: median: 1<br>[IQR: 0, 3]                                                                                                                                                                                               | <b>High</b><br>ICU (n=32) or COVID unit hospital (n=7): 46.4±20.9 days<br>Intubation (n=23): range: 4-36 days<br><br>Symptoms at admission to RP: Bacterial superinfection (n=23), Prone ventilation (n=17)                                                                      | Immediately after hospital discharge, 82 and 137 days after hospital discharge for 2 patients             | In hospital (rehabilitation unit)<br><br>Physical activity, respiratory exercises, swallowing rehabilitation<br><br>Duration: 25.5±16.3 days                                                    | Modality: aerobic<br>Type: walking (IT or continuous)<br>Frequency: NR<br>Volume: NR<br>Intensity: NR<br><br>Modality: resistance<br>Type: NR<br>Frequency: NR<br>Volume: NR<br>Intensity: NR<br><br>Modality: coordination and posturology<br>Type: active postural changes, readjustment of postural reflexes, coordination exercises for trunk control, recovery of standing position | <u>Functional capacity:</u><br>Peripheral nervous system impairment (electromyography)<br><br><u>Respiratory function:</u><br>Need for tracheostomy, Need for oxygen therapy, PaO <sub>2</sub> and FiO <sub>2</sub> (method NR)<br><br><u>Quality of life, mental health, and general state:</u><br>Mental confusion (method NR), Disability level (BI), Ambulation capacity (FAC)<br><br><u>Other:</u><br>Corticosteroids intake, Antipsychotic intake, Dysphagia (Need for enteral alimentation), Rectal colonization by multidrug resistant Enterobacteriaceae                 |

|                             |                                               |                                                                                                                                                                                                                                                                                                                                                                                                                                                                         |                                                                                                                                                                |                                                                                                                                                                                                                    |                                                                                                                                                                                                                                                                                      |                                                                                                                                                                                                                                                                                                                                                                                                                                                                                                                                                                                                                                                                                                          |                                                                                                                                                                                                                                                                                                     |
|-----------------------------|-----------------------------------------------|-------------------------------------------------------------------------------------------------------------------------------------------------------------------------------------------------------------------------------------------------------------------------------------------------------------------------------------------------------------------------------------------------------------------------------------------------------------------------|----------------------------------------------------------------------------------------------------------------------------------------------------------------|--------------------------------------------------------------------------------------------------------------------------------------------------------------------------------------------------------------------|--------------------------------------------------------------------------------------------------------------------------------------------------------------------------------------------------------------------------------------------------------------------------------------|----------------------------------------------------------------------------------------------------------------------------------------------------------------------------------------------------------------------------------------------------------------------------------------------------------------------------------------------------------------------------------------------------------------------------------------------------------------------------------------------------------------------------------------------------------------------------------------------------------------------------------------------------------------------------------------------------------|-----------------------------------------------------------------------------------------------------------------------------------------------------------------------------------------------------------------------------------------------------------------------------------------------------|
|                             |                                               |                                                                                                                                                                                                                                                                                                                                                                                                                                                                         |                                                                                                                                                                | Frequency: NR<br>Volume: NR<br>Intensity: N/A                                                                                                                                                                      |                                                                                                                                                                                                                                                                                      |                                                                                                                                                                                                                                                                                                                                                                                                                                                                                                                                                                                                                                                                                                          |                                                                                                                                                                                                                                                                                                     |
| Betschart et al., 2021 [38] | Prospective<br>Single group                   | COV+:<br>n=12 (4f, 8m); 61 yo (range: 26-84); NR<br>CVD (n=6), CKD (n=5), HT (n=3), Cancer (n=3), Chronic pulmonary disease (n=2), DM (n=1), Overweight/obesity (n=1), Polyneutropathia (n=1), Other disease (n=2)                                                                                                                                                                                                                                                      | <b>Moderate</b><br>Hospitalization: 11 days (range: 3-24)<br><br>Severity of pneumonia: Mild (n=1), Moderate (n=8), Severe (n=2), Critical (n=1)               | Duration between COVID-19 diagnosis and RP: 41.5 days (range: 21-73)<br>(One of the selection criteria: at least 14 days after confirmed diagnosis of COVID-19 and at least 4 days without COVID-related symptoms) | In hospital<br><br>Physical activity, education<br><br>Duration: 4-13 wk                                                                                                                                                                                                             | Modality: aerobic<br>Type: cycling (HIIT or MICT, probably on ergometer)<br>Frequency: 2x/wk<br>Volume: 30min<br>Intensity: REP=4-6 (Borg scale 0-10)<br>- HIIT: 4min 15%WR <sub>peak</sub> (warm-up), [4 x 4min 50%WR <sub>peak</sub> (RPE=4-6, Borg scale 0-10) + 3 x 3min 20-30%WR <sub>peak</sub> ], 3min 15%WR <sub>peak</sub> (cooling-down)<br>- MICT: 20-30%WR <sub>peak</sub> (WR <sub>peak</sub> assessed using the incremental ultra-short maximal steep ramp test)<br><br>Modality: resistance<br>Type: chest press, low row, back extension, leg abductor, leg curl, leg press<br>Frequency: 2x/wk<br>Volume: 3sets x 10-12rep (30-40min)<br>Intensity: 50-85%RM (RPE=4-6, Borg scale 0-10) | <u>Functional capacity:</u><br>6MWT<br><br><u>Quality of life, mental health, and general state:</u><br>QoL (EQ5D 5 levels, EQ5D VAS), Perception of COVID-19 specific limitations in daily life (Post-COVID Functionality score)<br><br><u>Other:</u><br>Adherence and tolerability of the program |
| Büsching et al., 2021 [39]  | Retrospective<br>Controlled trial, two groups | COV+ (with pneumonia):<br>n=51 (13f, 38m); 65.8±11.7 yo; 27.3±4.9 kg/m²<br>HT (n=30), Acute respiratory distress syndrome (n=26), CVD (n=8), COPD (n=2)<br>CIRS: 17.7±11.3<br><br>COV- (with pneumonia):<br>n=51 (28f, 23m); 69.8±9.6 yo; 26.1±6.5 kg/m²<br>COPD (n=25), HT (n=19), CVD (n=10), Acute respiratory distress syndrome (n=3)<br>CIRS: 13.5±5.9<br><br>Groups comparison: gender repartition (p<0.01), age (p<0.05), comorbidities (p<0.001), CIRS (p<0.05) | <b>Moderate-to-High</b><br>ICU (COV+: n=30; COV-: n=7)<br>Groups comparison: COV+ > COV-<br>Intubation:<br>- COV+ (n=27): 13±7 days<br>- COV- (n=6): 10±8 days | Immediately after discharge hospital                                                                                                                                                                               | In hospital<br><br>Physical activity, education (minimum 540 min), respiratory exercises, relaxation techniques, and if necessary, psychological counseling, speech, nutritional and occupational therapy, social services<br><br>Duration:<br>- COV+: 22±6 days<br>- CON: 20±5 days | Modality: aerobic<br>Type: cycling, guided walking<br>Frequency: NR<br>Volume: NR<br>Intensity: NR<br><br>Modality: resistance<br>Type: machines, free weight, elastic bands<br>Frequency: NR<br>Volume: NR<br>Intensity: NR                                                                                                                                                                                                                                                                                                                                                                                                                                                                             | <u>Functional capacity:</u><br>6MWT<br><br><u>Quality of life, mental health, and general state:</u><br>Disability level (Chronic respiratory questionnaire, FIM)                                                                                                                                   |
| Curci et al., 2021 [40]     | Retrospective<br>Single group                 | COV+:<br>n=41 (16f, 25m); 72.2±11.1 yo; 25.7±3.7 kg/m²<br>HT (n=26), DM2                                                                                                                                                                                                                                                                                                                                                                                                | <b>High</b><br>ICU: 18.0±8.7 days<br><br>Respiratory status at admission: No respiratory support (n=7), Nasal                                                  | Immediately post-ICU                                                                                                                                                                                               | In hospital (COVID-19 rehabilitation unit)                                                                                                                                                                                                                                           | Modality: aerobic<br>Type: walking<br>Frequency: NR<br>Volume: NR<br>Intensity: NR                                                                                                                                                                                                                                                                                                                                                                                                                                                                                                                                                                                                                       | <u>Functional capacity:</u><br>6MWT, RPE probably post-6MWT (Borg scale, probably 6-20)<br><br><u>Respiratory function:</u><br>Dyspnea in daily life activities (mMRC Dyspnea scale), Respiratory supports                                                                                          |

|                          |                                               |                                                                                                                                                                                                                                                                                                                                                                                                                                                                                    |                                                                                                                                                                                                                                                                 |                                                         |                                                                                                                                                   |                                                                                                                                                                                                                                                                                                                                                                                                                                                                                                                                    |                                                                                                                                                                                                                                                                                                                                                                                                            |
|--------------------------|-----------------------------------------------|------------------------------------------------------------------------------------------------------------------------------------------------------------------------------------------------------------------------------------------------------------------------------------------------------------------------------------------------------------------------------------------------------------------------------------------------------------------------------------|-----------------------------------------------------------------------------------------------------------------------------------------------------------------------------------------------------------------------------------------------------------------|---------------------------------------------------------|---------------------------------------------------------------------------------------------------------------------------------------------------|------------------------------------------------------------------------------------------------------------------------------------------------------------------------------------------------------------------------------------------------------------------------------------------------------------------------------------------------------------------------------------------------------------------------------------------------------------------------------------------------------------------------------------|------------------------------------------------------------------------------------------------------------------------------------------------------------------------------------------------------------------------------------------------------------------------------------------------------------------------------------------------------------------------------------------------------------|
|                          |                                               | (n=11), Malignancy (n=10), Pulmonary embolism (n=8), Dyslipidemia (n=7), Myocardial infarction (n=6), Arrhythmia (n=5), Stroke (n=5), HT (n=3), COPD (n=3), Hepatitis (n=3), Hypothyroidism (n=3), CKD (n=3), No comorbidity (n=3)                                                                                                                                                                                                                                                 | cannula (n=18), Venturi mask (n=8), Oxygen mask (n=5), Non-rebreather mask (n=3)                                                                                                                                                                                |                                                         | Physical activity, respiratory exercises, kinesiology<br><br>Duration: 32.0±9.1 days                                                              | Modality: resistance<br>Type: upper and lower limbs, trunk, gluteus muscles<br>Frequency: NR<br>Volume: 2-4sets x 8-12rep<br>Intensity: NR<br><br>Modality: balance and coordination<br>Type: one-legged stance, static heel/toes<br>Frequency: NR<br>Volume: NR<br>Intensity: N/A<br><br><u>Total (for all modalities):</u><br>Frequency: 2x/day<br>Volume: 30min                                                                                                                                                                 | need (Nasal cannula, oxygen mask, Venturi mask, Non-rebreather mask), FiO <sub>2</sub> , PaO <sub>2</sub> and SaO <sub>2</sub> (blood samples), CT pulmonary scan<br><br><u>Quality of life, mental health, and general state:</u><br>Disability level (BI), Ambulation capacity (method NR)<br><br><u>Biological parameters:</u><br>Arterial lactate, CRP, D-dimer, LDH                                   |
| Daynes et al., 2021 [41] | Prospective<br>Single group                   | COV+: n=30 (14f, 16m); 58±16 yo; NR<br>Asthma (n=3), COPD (n=1), CVD (n=1)                                                                                                                                                                                                                                                                                                                                                                                                         | <b>Moderate-to-High</b><br>Hospital (n=26): 10±14 days<br>ICU and mechanical ventilation (n=5)                                                                                                                                                                  | Duration between COVID-19 diagnosis and RP: 125±54 days | In hospital (center of exercise and rehabilitation sciences)<br><br>Physical activity, education<br><br>Duration: 6 wk                            | Modality: resistance<br>Type: lower and upper limbs<br>Frequency: NR<br>Volume: NR<br>Intensity: NR<br><br><u>Total (for all modalities):</u><br>Frequency: 2x/wk<br>Intensity: NR but used of dyspnea and RPE (Borg scale)                                                                                                                                                                                                                                                                                                        | <u>Functional capacity:</u><br>Incremental shuttle walking test, ESWT<br><br><u>Respiratory function:</u><br>Respiratory symptoms (COPD Assessment Test)<br><br><u>Quality of life, mental health, and general state:</u><br>Fatigue (Functional Assessment of Chronic Illness Therapy - Fatigue score), Anxiety and depression (HADS), QoL (ED5D), Cognition (MoCA)                                       |
| Dun et al., 2021 [42]    | Retrospective<br>Controlled trial, two groups | COV+ (≥5 performed RP sessions): n=27 (18f, 9m); 54±16 yo; 23.8±2.5 kg/m <sup>2</sup><br>CVD (n=6), DM (n=4), HT (n=3), Dyslipidemia (n=2), Smoking history (n=2), Cerebrovascular disease (n=2), Peptic ulcer (n=0), Cancer (n=0)<br><br>CON (COV+, <5 performed RP sessions): n=71 (35f, 36m); 44±13 yo; 23.8±3.2 kg/m <sup>2</sup><br>Smoking history (n=8), HT (n=8), Dyslipidemia (n=6), CVD (n=6), Cancer (n=4), DM (n=3), Peptic ulcer (n=3), Cerebrovascular disease (n=1) | <b>Moderate-to-High</b><br>Hospitalization:<br>- COV+: 18±9 days<br>- CON: 17±8 days<br><br>Clinical classification of COVID-19:<br>Mild (COV+: n=0, CON: n=1), Moderate (COV+: n=17; CON: n=56), Severe (COV+: n=8; CON: n=10), Critical (COV+: n=2; CON: n=4) | 2 wk after discharge from acute care                    | In hospital (rehabilitation center) and telerehabilitation (no-supervised)<br><br>Physical activity, respiratory exercises<br><br>Duration: 12 wk | <u>Supervised at hospital</u><br>Modality: aerobic<br>Type: cycling, walking (HIIT on ergocycle and treadmill)<br>Frequency: 3x/wk<br>Volume: 2sets x 4min/4min<br>Intensity: 4min high intensity (RPE=15-17, Borg scale 16-20)/4min low intensity (RPE<14)<br><br><u>Telerehabilitation</u><br>Modality: aerobic<br>Type: walking, jogging, cycling<br>Frequency: 2-5x/wk<br>Volume: 30-50min<br>Intensity: 40-60%HR <sub>max</sub> (predicted: 220 - age), RPE=13-14 [Evolution after 1 mo: 40-80%HR <sub>max</sub> , RPE=13-16] | <i>Post-RP tests were performed 10 wk after the end of the RP.</i><br><br><u>Functional capacity:</u><br>6MWT<br><br><u>Biological parameters:</u><br>SARS-CoV-2 IgG and IgM, Lymphocytes, WBC, Neutrophils, Eosinophils, Hemoglobin, Platelets, Alanine aminotransferase, Aspartate aminotransferase, Bilirubin, Total protein, ALB, Globulin, Blood urea nitrogen, Urid acid, Creatinine (blood samples) |

| Groups comparison:<br>age (p<0.01) |                             |                                                                                                                                                                                                                                                                    |                                                                                                                                                                                                                                                                                                                                                                |                                                                                                                                                           |                                                                                                                                                                                                                                                                                                                                                                                                                                                                                                                                                                                                                                                       |                                                                                                                                                                                                                                                                                                                                                                    |                                                                                                                                                                                                                                                                                                                                                                                                                                                                                                                                |
|------------------------------------|-----------------------------|--------------------------------------------------------------------------------------------------------------------------------------------------------------------------------------------------------------------------------------------------------------------|----------------------------------------------------------------------------------------------------------------------------------------------------------------------------------------------------------------------------------------------------------------------------------------------------------------------------------------------------------------|-----------------------------------------------------------------------------------------------------------------------------------------------------------|-------------------------------------------------------------------------------------------------------------------------------------------------------------------------------------------------------------------------------------------------------------------------------------------------------------------------------------------------------------------------------------------------------------------------------------------------------------------------------------------------------------------------------------------------------------------------------------------------------------------------------------------------------|--------------------------------------------------------------------------------------------------------------------------------------------------------------------------------------------------------------------------------------------------------------------------------------------------------------------------------------------------------------------|--------------------------------------------------------------------------------------------------------------------------------------------------------------------------------------------------------------------------------------------------------------------------------------------------------------------------------------------------------------------------------------------------------------------------------------------------------------------------------------------------------------------------------|
| Everaerts et al., 2021 [43]        | Prospective<br>Single group | COV+:<br>n=22 (7f, 15m);<br>median: 54.5 [IQR: 47, 61] yo; median: 28 [IQR: 25, 31] kg/m²<br>DM (n=4, but 3 of them stopped anti-DM treatment during the program), CKD (n=5)<br><br>Previous history of rehabilitation: n=5 (5 to 80 days before RP for the study) | <b>Moderate-to-High</b><br>Hospitalization: median: 29 [IQR: 12, 39] days<br>Mechanical ventilation (n=7): median: 14 [IQR: 11, 24] days<br>Among ICU patients (n=15): High-flow oxygen nasal cannula (n=1), Mechanically ventilated (n=14; among them n=1 Extracorporeal membrane oxygenation, n=2 Tracheostomy)<br><br>Need for oxygen at RP admission (n=2) | Duration between hospital discharge and RP: median: 47 [IQR: 15, 69] days<br><br>In hospital (outpatient)<br><br>Physical activity<br><br>Duration: 12 wk | Modality: aerobic<br>Type: walking, cycling, stepping (continuous or IT, on treadmill, ergocycle, arm ergometer, stair climbing, step)<br>Frequency: NR<br>Volume: NR<br>Intensity: started at 60-75%WR <sub>max</sub> of CPET<br>[Evolution: Patients went from IT (for patients not able to cycle ≥ 10min on 80%WR <sub>max</sub> during CPET) to continuous training before wk 6]<br><br>Modality: resistance<br>Type: lower and upper limbs (leg, chest press)<br>Frequency: NR<br>Volume: NR<br>Intensity: NR<br><br><u>Total (for all modalities):</u><br>Frequency: 3x/wk<br>Volume: 90min<br>Intensity: Dyspnea and RPE=4-6 (Borg scale 0-10) | <u>Functional capacity:</u><br>6MWT, CPET, Handgrip, Quadriceps strength (method NR)<br><br><u>Respiratory function:</u><br>FVC, FEV, TLC, DLCO, PI <sub>max</sub> , PE <sub>max</sub> (methods NR)<br><br><u>Quality of life, mental health, and general state:</u><br>Anxiety and depression (HADS), Cognitive deficits (reported by patients), Cognition (MoCA) |                                                                                                                                                                                                                                                                                                                                                                                                                                                                                                                                |
| Ferraro et al., 2021 [44]          | Prospective<br>Case series  | COV+:<br>n=7 (2f, 5m);<br>65.7±11.9 yo; NR<br>HT (n=2), DM2 (n=1), Liver disease (n=1), CKD (n=1), Smoking history (n=1)                                                                                                                                           | <b>Moderate-to-High</b><br>Hospitalization: 27±11 days (calculated from raw data)<br>ICU (n=2): 15 and 18 days<br><br>COVID-19 complications: Bilateral pneumonia (n=7), Peripheral neuropathy (n=3), Pulmonary embolism (n=1), Stroke (n=1)                                                                                                                   | NR<br><br>In hospital (COVID-19 rehabilitation unit)<br><br>Physical activity, respiratory exercises, kinesitherapy<br><br>Duration: NR                   | Modality: aerobic<br>Type: walking [for progressive distances]<br>Frequency: NR<br>Volume: NR<br>Intensity: NR<br><br>Modality: resistance<br>Type: lower and upper limbs, trunk, gluteus muscles<br>Frequency: NR<br>Volume: NR<br>Intensity: NR<br><br>Modality: balance and coordination<br>Type: one-legged stance, static heel/toes<br>Frequency: NR<br>Volume: NR<br>Intensity: NR<br><br><u>Total (for all modalities):</u><br>Frequency: 6x/wk, 1-2x/day<br>Volume: 30min                                                                                                                                                                     | <u>Functional capacity:</u><br>6MWT, Handgrip, 10MWT, SPPB (score 0-12 from 3 tests: static body balance, ability to walk, and stand up from a chair)<br><br><u>Quality of life, mental health, and general state:</u><br>Fatigue (Borg scale 0-10), Disability level (FIM, BI)                                                                                    |                                                                                                                                                                                                                                                                                                                                                                                                                                                                                                                                |
| Gloeckl et al., 2021 [45]          | Prospective<br>Two groups   | M.CO.V+ (mild/moderate COV+):<br>n=24 (20f, 4m);<br>median: 52 [IQR: 47, 56] yo; median: 24.7 [IQR: 22.0, 29.8] kg/m²<br>Obstructive sleep apnea (n=9), Chronic lung disease (n=7),                                                                                | <b>Low-to-High</b><br>M.CO.V+: <b>Low</b> (no hospitalization)<br><br>S.CO.V+: <b>Moderate-to-High</b><br>Hospitalization: 26 days<br>ICU (n=22): median: 28 [IQR: 15, 40] days<br>Need for oxygen (n=24)<br>Mechanical ventilation (n=15): median: 18 [IQR: 11, 43] days                                                                                      | NR for M.CO.V+<br><br>S.CO.V+: median: 18 days [IQR: 5, 40] after hospital discharge                                                                      | In hospital<br><br>Physical activity, education, respiratory exercises, activities of daily living training, relaxation techniques, occupational therapy, psychological support, nutritional counselling, drug therapy                                                                                                                                                                                                                                                                                                                                                                                                                                | Modality: aerobic<br>Type: cycling<br>Frequency: 5x/wk<br>Volume: 10-20min<br>Intensity: 60-70%WR <sub>peak</sub> (NR if intensity was estimated or defined from a previously test)<br><br>Modality: resistance<br>Type: machines (leg press, knee extension, pull-down, push-down, and                                                                            | <u>Functional capacity:</u><br>6MWT<br>Only for S.CO.V+: ESWT, HR pre- and post-ESWT, Maximal isometric knee extension, Handgrip, 5-rep STST<br><br><u>Respiratory function:</u><br>FVC, FEV1, TLC, DLCO, KCO (plethysmography), PaO <sub>2</sub> and PaCO <sub>2</sub> (blood samples), Dyspnea post-6MWT (Borg scale, probably 0-10), Need for oxygen therapy during rest and exertion<br>Only for S.CO.V+: SaO <sub>2</sub> and breathing frequency pre- and post-ESWT, Dyspnea during daily activities (MRC Dyspnea scale) |

|                         |                               |                                                                                                                                                                                                                                                                                                                                                                                                                                                                                                                                                                                       |                                                                                                                                                            |                                                                                                                                                                                          |                                                                                                                                                                                                                                                                                                                                                                                                                                                                                                                                                                                                                                                                                      |                                                                                                                                                                                                                                                                                                                                                                                                                                                                                                                                                                                |
|-------------------------|-------------------------------|---------------------------------------------------------------------------------------------------------------------------------------------------------------------------------------------------------------------------------------------------------------------------------------------------------------------------------------------------------------------------------------------------------------------------------------------------------------------------------------------------------------------------------------------------------------------------------------|------------------------------------------------------------------------------------------------------------------------------------------------------------|------------------------------------------------------------------------------------------------------------------------------------------------------------------------------------------|--------------------------------------------------------------------------------------------------------------------------------------------------------------------------------------------------------------------------------------------------------------------------------------------------------------------------------------------------------------------------------------------------------------------------------------------------------------------------------------------------------------------------------------------------------------------------------------------------------------------------------------------------------------------------------------|--------------------------------------------------------------------------------------------------------------------------------------------------------------------------------------------------------------------------------------------------------------------------------------------------------------------------------------------------------------------------------------------------------------------------------------------------------------------------------------------------------------------------------------------------------------------------------|
|                         |                               | <p>Smoking history (n=7), Obesity (n=5), HT (n=5), Dyslipidemia (n=3), Coronary heart disease (n=1), DM (n=1), CKD (n=0), Stroke (n=0)<br/>Comorbidities/patient: median: 2 [IQR: 2, 4]</p> <p>S.COV+ (severe/critical COV+): n=26 (8f, 18m); median: 66 [IQR: 60, 71] yo; median: 26.9 [IQR: 24.2, 29.2] kg/m<sup>2</sup><br/>Smoking history (n=20), HT (n=16), Dyslipidemia (n=10), Obstructive sleep apnea (n=9), Coronary heart disease (n=7), DM (n=6), CKD (n=6), Chronic lung disease (n=5), Obesity (n=5), Stroke (n=1)<br/>Comorbidities/patient: median: 3 [IQR: 3, 5]</p> | Duration: 3 wk                                                                                                                                             | if possible: butterfly, forward/backward, rowing, back extension, abdominal trainer)<br>Frequency: 5x/wk<br>Volume: 3sets x 15-20rep (30min)<br>Intensity: NR                            | <u>Quality of life, mental health, and general state:</u><br>QoL (SF-36)<br>Only for S.COV+: Anxiety (GAD-7), Depression (PHQ-9), Cognition (MoCA), COVID-19 symptoms                                                                                                                                                                                                                                                                                                                                                                                                                                                                                                                | <u>Biological parameters:</u><br>CRP, Leukocytes, D-dimer, Pro-BNP                                                                                                                                                                                                                                                                                                                                                                                                                                                                                                             |
| Gobbi et al., 2021 [46] | Prospective<br>Two groups     | <p>Total group: n=34 (18f, 16m); NR; HT (n=6), CVD (n=6), DM (n=3)<sup>u</sup></p> <p>S.COV+ (COV+ with sarcopenia): n=20 (9f, 11m); 71.5±17.0 yo; 21.0±4.2 kg/m<sup>2</sup><br/>Comorbidities NR</p> <p>NS.COV+ (COV+ without sarcopenia): n=14 (9f, 5m); 68.0±16.5 yo; 27.3±9.0 kg/m<sup>2</sup><br/>Comorbidities NR</p> <p>Groups comparison: age (p-value NR), BMI (p-value NR)</p>                                                                                                                                                                                              | <p><b>Moderate-to-High</b><br/>ICU (Total group: n=11; S.COV+: n=8; NS.COV+: n=3)</p> <p>Probably immediately after hospital discharge</p>                 | <p>In hospital (rehabilitation unit from COVID hospital)</p> <p>Physical activity, psychiatric support, cognitive behavioral therapy, nutritional treatment</p> <p>Duration: 28 days</p> | <p>Modality: aerobic<br/>Type: cycling (ergocycle), arm ergometer<br/>Frequency: NR<br/>Volume: NR<br/>Intensity: 65%HR<sub>max</sub> (predicted: (220-age)x0.65)</p> <p>Modality: resistance<br/>Type: sitting-to-bed exercises for upper-body conditioning and progressive limb muscle strengthening<br/>Frequency: NR<br/>Volume: 1-3sets x 8-12rep (2min recovery between sets)<br/>Intensity: NR</p> <p><u>Total (for all modalities):</u><br/>Frequency: 6x/wk<br/>Volume: 45min<br/>Intensity: Individualized with patient's conditioning, subjective perception of fatigue and clinical status. RPE (Borg scale 0-10) and SaO<sub>2</sub> was monitored during exercise.</p> | <p><u>Functional capacity:</u><br/>Handgrip, Time-up-to-go test (&gt;13.5s = practical cut-off for high fall risk, &gt;20s = severe sarcopenia)</p> <p><u>Respiratory function:</u><br/>Dyspnea (Borg scale 0-10) and SaO<sub>2</sub> in lying, sitting and standing positions, and at the end of Time-up-to-go test</p> <p><u>Biological parameters:</u><br/>ALB, Ferritin, Vitamin D</p> <p><u>Other:</u><br/>BMI, Phase angle and ASM (obtained from impedancemetry with the whole-body resistance and the reactance, ASM&lt;20 for m and ASM&lt;15 for f = sarcopenia)</p> |
| Güler et al., 2021 [47] | Retrospective<br>Single group | <p>COV+: n=85 (22f, 63m); 58.3±11.1 yo; 25.3±4.8 kg/m<sup>2</sup> (range: 17.7-46.7)<br/>HT (n=42), DM</p>                                                                                                                                                                                                                                                                                                                                                                                                                                                                            | <p><b>Moderate-to-High</b><br/>Hospitalization: 16±12 days (range: 1-60)<br/>ICU (n=67): 19±19 days (range: 0-120)<br/>Respiratory status (probably at</p> | <p>In hospital (COVID-19 rehabilitation clinic)</p> <p>Physical activity (Neuromuscular rehabilitation, n=77;</p>                                                                        | <p><u>"Neuromuscular rehabilitation"</u><br/>Modality: aerobic<br/>Type: walking (in the parallel bar and the hall), step climbing<br/>Frequency: NR</p>                                                                                                                                                                                                                                                                                                                                                                                                                                                                                                                             | <p><u>Respiratory function:</u><br/>Need for oxygen therapy</p> <p><u>Quality of life, mental health, and general state:</u><br/>Disability level (BI), Functional status</p>                                                                                                                                                                                                                                                                                                                                                                                                  |

|                          |                                                                                 |                                                                                                                                                                                                                                                                                       |                                                                                                                                                                                                                                                                                                                                                                                                                                                                                                                                                         |                                                                                                                                                                                                                                                      |                                                                                                                                                                                                                                                |                                                                                                                                                                                                                                                                                                                                                                                                                                                                                                                                                                                                                                                                                                                                                                                                                                                                                                 |                                                                                                                                      |                                                                                                                |                                                                                                                                                                                                                                  |
|--------------------------|---------------------------------------------------------------------------------|---------------------------------------------------------------------------------------------------------------------------------------------------------------------------------------------------------------------------------------------------------------------------------------|---------------------------------------------------------------------------------------------------------------------------------------------------------------------------------------------------------------------------------------------------------------------------------------------------------------------------------------------------------------------------------------------------------------------------------------------------------------------------------------------------------------------------------------------------------|------------------------------------------------------------------------------------------------------------------------------------------------------------------------------------------------------------------------------------------------------|------------------------------------------------------------------------------------------------------------------------------------------------------------------------------------------------------------------------------------------------|-------------------------------------------------------------------------------------------------------------------------------------------------------------------------------------------------------------------------------------------------------------------------------------------------------------------------------------------------------------------------------------------------------------------------------------------------------------------------------------------------------------------------------------------------------------------------------------------------------------------------------------------------------------------------------------------------------------------------------------------------------------------------------------------------------------------------------------------------------------------------------------------------|--------------------------------------------------------------------------------------------------------------------------------------|----------------------------------------------------------------------------------------------------------------|----------------------------------------------------------------------------------------------------------------------------------------------------------------------------------------------------------------------------------|
|                          |                                                                                 | (n=29), Smoking history (n=13), COPD (n=14), CVD (n=14), Thyroid disease (n=10), Rheumatic disorders (n=5), CKD (n=1), Cancer (n=1)                                                                                                                                                   | admission to RP): Nasal oxygen cannula (n=77), Reservoir mask (n=53), High flow oxygen therapy (n=33), Non-invasive ventilator (n=5), Mechanical ventilation (n=31)                                                                                                                                                                                                                                                                                                                                                                                     | COVID-19 complications: Pulmonary involvement (n=48), Guillain-Barré syndrome (n=18), Critical illness-related myopathy/neuropathy (n=11), Acute cerebrovascular disease (n=8), Dysphagia (n=5), Steroid myopathy (n=1), Sinus vein thrombosis (n=1) | Arm/cycle ergometer, n=44), electrostimulation (Without cycling, n=43; With cycling, n=29), respiratory exercises (High-frequency chest oscillation devices: n=10), speech and swallowing therapy (n=5), nutritional and psychological support | Volume: NR<br>Intensity: NR                                                                                                                                                                                                                                                                                                                                                                                                                                                                                                                                                                                                                                                                                                                                                                                                                                                                     | Modality: resistance<br>Type: active and passive exercises<br>Frequency: NR<br>Volume: NR<br>Intensity: NR                           | Modality: balance and coordination<br>Type: standing exercises<br>Frequency: NR<br>Volume: NR<br>Intensity: NR | <u>"Arm/cycle ergometer"</u><br>Modality: aerobic<br>Type: "arm cycle" ergometer<br>Frequency: 5x/wk<br>Volume: 20-30min<br>Intensity: 40-60%WR <sub>max</sub> (NR if intensity was estimated or defined from a previously test) |
| Hameed et al., 2021 [48] | Prospective Controlled trial, three interventional groups and one control group | VPT COV+ ('Virtual physical therapy') <sup>µ</sup> : n=44 (25f, 19m); median: 60 [IQR: 14] <sup>µ</sup> yo; median: 30.6 [IQR: 8.2] <sup>µ</sup> kg/m <sup>2</sup> (n=27)<br>HT (n=22), DM (n=11), Other pulmonary diseases (n=8), CVD (n=6), Autoimmune disorder (n=5), Asthma (n=4) | <b>Moderate-to-high</b><br>Hospitalization:<br>- VPT: median: 14 [IQR: 14] <sup>µ</sup> days<br>- HPT: median: 39 [IQR: 30] <sup>µ</sup> days<br>- EI: median: 9 [IQR: 17] <sup>µ</sup> days<br>- CON: median: 13 [IQR: 33] <sup>µ</sup> days<br>Intubation:<br>- VPT (n=6): median: 13 [IQR: 11] <sup>µ</sup> days<br>- HPT (n=16): median: 20 [IQR: 15] <sup>µ</sup> days<br>- EI (n=5): median: 10 [IQR: 15] <sup>µ</sup> days<br>- CON (n=5): median: 13 [IQR: 17] <sup>µ</sup> days<br>Duration of hospitalization effect between groups (p<0.001) | Unclear                                                                                                                                                                                                                                              | Telerehabilitation (supervised sessions and independently sessions)<br><br>Physical activity, respiratory exercises<br><br>Duration: 4-6 wk                                                                                                    | Modality: resistance<br>Type: circuit training detailed in a guide for the patients (sit to stand, standing walk, shoulder caption, standing heel raises, sidestepping, wall pushups) or detailed in videos on Internet (for phase 4)<br>Frequency: 1set 4x/day everyday (phase 1); 2sets 2x/day, 6x/wk (phase 2); 3sets 2x/day, 6x/wk (phase 3); 1-2 sessions/wk were tele-supervised<br>Volume: 1-3sets; alternance of 30s work/30s rest (30-60min) [Evolution: increase until 1min work/1min rest (with stable vitals at rest: SaO <sub>2</sub> >90%, RPE<3 and 'HR within acceptable activity-specific increases with exercise') and then pass in the next phase]<br>Intensity: NR, but HR, SaO <sub>2</sub> (always>88%) and RPE (Borg scale 0-10) were monitored during exercise. If more rest was needed, patients were able to rest until they achieved RPE≤3 or SaO <sub>2</sub> >90%. | <u>Functional capacity:</u><br>2-min step test, 30-s STST<br><br><u>Respiratory function:</u><br>SaO <sub>2</sub> (probably at rest) |                                                                                                                |                                                                                                                                                                                                                                  |

|                          |                          |                                                                                                                                                                                                                                                                                                                                                                                                                                                                                                                                                                                                                                                                                                                   |                                                                                                                                                                                                                                                                                                                                                                                                                                                                                                                                                                                                                                                                                                                                                                                                                                                                                                                                                                                      |                                                                                                                                                                                                                                                                                                                                                                                                                                                                                                                                                                                                                                                                                          |                                                                                                                                                                                                                                                                                                                                                                                                                                                                                                                                                                                                                                                                                                      |                                                                                                                                                                                                                                                                                                                                                                                                                                                                                                                                                                                                                                                                                                                                                                                  |
|--------------------------|--------------------------|-------------------------------------------------------------------------------------------------------------------------------------------------------------------------------------------------------------------------------------------------------------------------------------------------------------------------------------------------------------------------------------------------------------------------------------------------------------------------------------------------------------------------------------------------------------------------------------------------------------------------------------------------------------------------------------------------------------------|--------------------------------------------------------------------------------------------------------------------------------------------------------------------------------------------------------------------------------------------------------------------------------------------------------------------------------------------------------------------------------------------------------------------------------------------------------------------------------------------------------------------------------------------------------------------------------------------------------------------------------------------------------------------------------------------------------------------------------------------------------------------------------------------------------------------------------------------------------------------------------------------------------------------------------------------------------------------------------------|------------------------------------------------------------------------------------------------------------------------------------------------------------------------------------------------------------------------------------------------------------------------------------------------------------------------------------------------------------------------------------------------------------------------------------------------------------------------------------------------------------------------------------------------------------------------------------------------------------------------------------------------------------------------------------------|------------------------------------------------------------------------------------------------------------------------------------------------------------------------------------------------------------------------------------------------------------------------------------------------------------------------------------------------------------------------------------------------------------------------------------------------------------------------------------------------------------------------------------------------------------------------------------------------------------------------------------------------------------------------------------------------------|----------------------------------------------------------------------------------------------------------------------------------------------------------------------------------------------------------------------------------------------------------------------------------------------------------------------------------------------------------------------------------------------------------------------------------------------------------------------------------------------------------------------------------------------------------------------------------------------------------------------------------------------------------------------------------------------------------------------------------------------------------------------------------|
|                          |                          | Autoimmune disorder (n=1), Other pulmonary diseases (n=0)                                                                                                                                                                                                                                                                                                                                                                                                                                                                                                                                                                                                                                                         |                                                                                                                                                                                                                                                                                                                                                                                                                                                                                                                                                                                                                                                                                                                                                                                                                                                                                                                                                                                      |                                                                                                                                                                                                                                                                                                                                                                                                                                                                                                                                                                                                                                                                                          |                                                                                                                                                                                                                                                                                                                                                                                                                                                                                                                                                                                                                                                                                                      |                                                                                                                                                                                                                                                                                                                                                                                                                                                                                                                                                                                                                                                                                                                                                                                  |
|                          |                          | CON (COV+ without intervention): n=20 (11f, 9m); median: 58 [IQR: 18]ª yo; median: 28.7 [IQR: 9.7]ª kg/m² (n=13)<br>HT (n=11), DM (n=8), CVD (n=3), Other pulmonary diseases (n=2), Asthma (n=0), Autoimmune disorder (n=0)                                                                                                                                                                                                                                                                                                                                                                                                                                                                                       |                                                                                                                                                                                                                                                                                                                                                                                                                                                                                                                                                                                                                                                                                                                                                                                                                                                                                                                                                                                      |                                                                                                                                                                                                                                                                                                                                                                                                                                                                                                                                                                                                                                                                                          |                                                                                                                                                                                                                                                                                                                                                                                                                                                                                                                                                                                                                                                                                                      |                                                                                                                                                                                                                                                                                                                                                                                                                                                                                                                                                                                                                                                                                                                                                                                  |
|                          |                          | Groups comparison: gender effect between groups (p<0.05)                                                                                                                                                                                                                                                                                                                                                                                                                                                                                                                                                                                                                                                          |                                                                                                                                                                                                                                                                                                                                                                                                                                                                                                                                                                                                                                                                                                                                                                                                                                                                                                                                                                                      |                                                                                                                                                                                                                                                                                                                                                                                                                                                                                                                                                                                                                                                                                          |                                                                                                                                                                                                                                                                                                                                                                                                                                                                                                                                                                                                                                                                                                      |                                                                                                                                                                                                                                                                                                                                                                                                                                                                                                                                                                                                                                                                                                                                                                                  |
| Hayden et al., 2021 [49] | Prospective Three groups | <p>Total groups (COV+): n=108 (49f, 59m); 55.6±10.1 yo (range: 32-85); 30.2±6.1 kg/m² (range: 19.3-53.3)<br/>CVD (n=60), Obesity (n=46), Orthopedic comorbidities (n=44), Upper or lower airway disease (n=34, among them, COPD n=2 and Asthma n=18), Hyperlipoproteinemia (n=28), Psychological comorbidities (n=27), Neurological comorbidities (n=24), DM (n=15), No comorbidity (n=2)</p> <p>Group A (severe COV+ with hospital discharge &lt; 1 mo): n=55 (21f, 34m); 57.9±10.8 yo (range: 33-85); 29.9±5.7 kg/m² (range: 19.3-53.3)<br/>Comorbidities NR</p> <p>Group B (severe COV+ with hospital discharge &gt; 1 mo): n=32 (11f, 21m); 54.0±9.9 yo (range: 32-80); 31.5±6.7 kg/m² (range: 21.0-48.3)</p> | <p><b>Moderate-to-High</b><br/>Hospitalization:<br/>- Total groups: 26±18 days (range: 1-101)<br/>- Group A: 32±19 days (range: 3-101)<br/>- Group B: 19±11 days (range: 3-49)<br/>- Group C (n=5): 1 night maximum ICU:<br/>- Total groups (n=57): 24±17 days (range: 5-97)<br/>- Group A (n=39): 22±18 days (range: 4-97)<br/>- Group B (n=18): 15±9 days (range: 5-40)<br/>- Group C: N/A<br/>Invasive ventilation:<br/>- Total groups (n=39): 18±16 days (range: 5-87)<br/>- Group A (n=27): 20±18 days (range: 8-87)<br/>- Group B (n=12): 12±5 days (range: 5-23)<br/>- Group C: N/A<br/>Need for oxygen therapy (% of sample):<br/>- Total groups: 68%<br/>- Group A: 87%<br/>- Group B: 69%<br/>- Group C: 14%<br/>Groups comparison: Group C &lt; Groups A and B</p> <p>Most important symptoms (% of total sample): Dyspnea (50%), Anxiety and worries regarding one's own health status (17%), Faintness/lack of energy (16%), Pain in various parts of the body (8%)</p> | <p>Duration between the acute phase or hospital discharge and RP:<br/>- Total groups: 69±75 days (range: 0-270)<br/>- Group A: 11±11 days (range: 0-31) (n=24 immediately after hospital discharge)<br/>- Group B: 121±70 days (range: 32-270)<br/>- Group C: 143±55 days (range: 35-270)</p> <p>In hospital (inpatient rehabilitation center)</p> <p>Physical activity and vibration training if necessary, respiratory exercises, patient information about COVID-19, routine medical diagnosis, psychological support, and if necessary, daily activities life training, nutritional counseling, occupational therapy</p> <p>Duration (Total group): 26±6 days (range: 5-42 days)</p> | <p>Modality: aerobic<br/>Type: cycling (probably on ergocycle), nordic walking, indoor sports<br/>Frequency: 3-5x/wk<br/>Volume: 30-60min<br/>Intensity: for cycling, based on 6MWT performance (RPE=4-6, Borg scale 0-10)</p> <p>Modality: resistance<br/>Type: machines (leg press, rowing pull, latissimus pull, butterfly reverse, cable pull, abdominal exercises)<br/>Frequency: 2-3x/wk<br/>Volume: 3sets x 12rep<br/>Intensity: 12RM</p> <p>Modality: vibration (if necessary)<br/>Type: statically in squat position<br/>Frequency: 7x/wk<br/>Volume: 3sets x 1-2min<br/>Intensity: 16-26 Hz (1.5-4 amplitude) (the goal was muscular exhaustion at the end of the set and the session)</p> | <p><u>Functional capacity:</u><br/>6MWT</p> <p><u>Respiratory function:</u><br/>VC, TLC, FEV1, DLCO, P<sub>lmax</sub>, RV, total specific airway resistance (spirometry and plethysmography), PaO<sub>2</sub> and PaCO<sub>2</sub> (blood samples), Dyspnea at rest and exertion (11-point NRS, MRC Dyspnea scale)</p> <p><u>Quality of life, mental health, and general state:</u><br/>QoL (EQ5D 5 levels, EQ5D 5 levels VAS), Fatigue (Brief Fatigue Inventory), Depression (PHQ-9), Anxiety (GAD-7), Cough, Sputum and pain (11-point NRS), Global rating of change in subjective health</p> <p><u>Biological parameters:</u><br/>D-dimer, CRP, BNP, LDH</p> <p><u>Adherence and tolerability:</u><br/>Estimation of the rehabilitation effectiveness (Likert scale 0-10)</p> |



|                           |                            |                                                                                                                                                                                                                                                                                                                                                                                                                                                                                                                                                                                                                                                                                               |                                                                                                                                                                                                                                                                                                                                                                                                                                                                                                                                                                        |                                                                                                                                                                                                                                                                    |                                                                                                                                                                                                                        |                                                                                                                                                                                                                                                                                                                                                                                                                                                                                                                                                                                                                                                                                                                                                                                                                             |                                                                                                                                                                                                                                         |
|---------------------------|----------------------------|-----------------------------------------------------------------------------------------------------------------------------------------------------------------------------------------------------------------------------------------------------------------------------------------------------------------------------------------------------------------------------------------------------------------------------------------------------------------------------------------------------------------------------------------------------------------------------------------------------------------------------------------------------------------------------------------------|------------------------------------------------------------------------------------------------------------------------------------------------------------------------------------------------------------------------------------------------------------------------------------------------------------------------------------------------------------------------------------------------------------------------------------------------------------------------------------------------------------------------------------------------------------------------|--------------------------------------------------------------------------------------------------------------------------------------------------------------------------------------------------------------------------------------------------------------------|------------------------------------------------------------------------------------------------------------------------------------------------------------------------------------------------------------------------|-----------------------------------------------------------------------------------------------------------------------------------------------------------------------------------------------------------------------------------------------------------------------------------------------------------------------------------------------------------------------------------------------------------------------------------------------------------------------------------------------------------------------------------------------------------------------------------------------------------------------------------------------------------------------------------------------------------------------------------------------------------------------------------------------------------------------------|-----------------------------------------------------------------------------------------------------------------------------------------------------------------------------------------------------------------------------------------|
|                           |                            | Comorbidities NR                                                                                                                                                                                                                                                                                                                                                                                                                                                                                                                                                                                                                                                                              |                                                                                                                                                                                                                                                                                                                                                                                                                                                                                                                                                                        |                                                                                                                                                                                                                                                                    |                                                                                                                                                                                                                        |                                                                                                                                                                                                                                                                                                                                                                                                                                                                                                                                                                                                                                                                                                                                                                                                                             |                                                                                                                                                                                                                                         |
|                           |                            | Group C (mild COV+):<br>n=21 (17f, 4m);<br>52.1±6.8 yo (range: 39-61); 28.9±6.1 kg/m² (range: 19.9-46.0)<br>Comorbidities NR                                                                                                                                                                                                                                                                                                                                                                                                                                                                                                                                                                  |                                                                                                                                                                                                                                                                                                                                                                                                                                                                                                                                                                        |                                                                                                                                                                                                                                                                    |                                                                                                                                                                                                                        |                                                                                                                                                                                                                                                                                                                                                                                                                                                                                                                                                                                                                                                                                                                                                                                                                             |                                                                                                                                                                                                                                         |
|                           |                            | Groups comparison: significant differences between Group C with Groups A and B for gender repartition (p<0.001) and age (p<0.01)                                                                                                                                                                                                                                                                                                                                                                                                                                                                                                                                                              |                                                                                                                                                                                                                                                                                                                                                                                                                                                                                                                                                                        |                                                                                                                                                                                                                                                                    |                                                                                                                                                                                                                        |                                                                                                                                                                                                                                                                                                                                                                                                                                                                                                                                                                                                                                                                                                                                                                                                                             |                                                                                                                                                                                                                                         |
| Hermann et al., 2020 [50] | Retrospective Two groups   | Total groups (COV+):<br>n=28 (14f, 14m);<br>66.0±9.3 yo; 27.6±4.9 kg/m²<br>HT (n=14), DM2 (n=7), Smoking history (n=7), Dyslipidemia (n=6), COPD (n=6), CKD (n=5), Coronary artery disease (n=4), Peripheral artery disease (n=2), Stroke (n=1)<br><br>Ventilation+ (COV+):<br>n=12 (3f, 9m);<br>64.3±8.9 yo; 26.9±3.5 kg/m²<br>HT (n=5), Smoking history (n=5), DM2 (n=4), CKD (n=3), Dyslipidemia (n=2), Coronary artery disease (n=1)<br><br>Ventilation- (COV+):<br>n=16 (11f, 5m);<br>67.4±9.7 yo; 28.1±5.7 kg/m²<br>HT (n=9), COPD (n=6), Dyslipidemia (n=4), Coronary artery disease (n=3), DM2 (n=3), Peripheral artery disease (n=2), CKD (n=2), Smoking history (n=2), Stroke (n=1) | <b>Moderate-to-High</b><br>Hospitalization:<br>- Total groups: 19.3±10.7 days<br>- Ventilation+: 27.6±9.1 days<br>- Ventilation-: 12.7±6.5 days<br>ICU:<br>- Total groups (n=17): 13.9±7.3 days<br>- Ventilation+ (n=12): 17.0±5.9 days<br>- Ventilation- (n=5): 6.4±3.8 days<br><br>Respiratory status at RP admission (Total groups): Need for non-invasive ventilation (n=3, only during night time), Need for oxygen therapy (n=21)<br><br>85% of positive patients for COVID-19 at admission<br><br>Groups comparison: hospitalization and ICU duration (p<0.001) | Duration of hospitalization before admission to RP (Total groups): 19.3±10.7 days<br><br>(Initially admitted in the RP after being asymptomatic for 2 days and 10 days after onset of infection, and later admitted if at least one negative swab before transfer) | In hospital<br><br>Physical activity, respiratory exercises, education, nutritional/diabetes advices, structured smoking cessation program if needed, psychosocial support, massages<br><br>Duration: 2-4 wk (20 days) | Modality: aerobic<br>Type: walking (in- or out-door), cycling (ergocycle)<br>Frequency: NR<br>Volume: NR<br>Intensity: NR (but derived from initial 6MWT. Criteria for stopping or reducing exercise intensity was SaO₂<88%, symptom limited (RPE≥6) or/and reaching submaximal HR). [Evolution: adjusted continuously to achieve the maximum tolerated exercise load <sup>a</sup> ]<br><br>Modality: resistance<br>Type: NR<br>Frequency: NR<br>Volume: 3sets x 20rep<br>Intensity: 20RM <sup>a</sup><br><br><u>For isolated patients:</u><br>Frequency: 1-2x/day<br>Volume: 15-45min<br>Intensity: limited<br>Instructions for self-training<br><br><u>Total (for all RP):</u><br>Frequency: 5-6x/wk<br>When a drop in SaO₂ was observed, oxygen was added with a maximum of 4L <i>via</i> nasal cannula to keep SaO₂>90% | <u>Functional capacity:</u><br>6MWT<br><br><u>Respiratory function:</u><br>SaO₂ (probably at rest), Need for oxygen therapy<br><br><u>Quality of life, mental health, and general state:</u><br>Patients' feeling (Feeling Thermometer) |
| Imamura et al., 2021 [51] | Retrospective Single group | COV+:<br>n=27 (7f, 20m);<br>53.8±13.3 yo;<br>27.6±5.8 kg/m²<br>For n=23 (4 'drop-out'): HT (n=12), DM                                                                                                                                                                                                                                                                                                                                                                                                                                                                                                                                                                                         | <b>High</b> (n=23)<br>Hospitalization: 75±40 days (range: 20-164)<br>ICU: 30±18 days (range: 5-76)<br>Intubation: 23±14 days                                                                                                                                                                                                                                                                                                                                                                                                                                           | Immediately after hospital discharge                                                                                                                                                                                                                               | In hospital (inpatient rehabilitation institute)<br><br>Physical activity, electrostimulation, speech, psychology, nutrition and                                                                                       | Modality: aerobic<br>Type: cycling (ergocycle)<br>Frequency: NR<br>Volume: NR<br>Intensity: NR<br><br><u>Functional capacity:</u><br>Muscle strength (MRC score 1-60), SPPB (score 0-12 from 3 tests: static body balance, ability to walk and stand up from a chair)<br><br><u>Respiratory function:</u><br>PI <sub>max</sub> and PE <sub>max</sub> (manovacuometer)                                                                                                                                                                                                                                                                                                                                                                                                                                                       |                                                                                                                                                                                                                                         |

|                           |                                          |                                                                                                                                                                                                                                                                                                                                                                                                                                          |                                                                                                                                                                                                                                                                                                                                                                       |                                                                                                                                                                    |                                                                                                                                                                                              |                                                                                                                                                                                                                                                                                                                                                                                                                                                                                                                                    |                                                                                                                                                                                                                                                                                                                                                                                                                                                                                                                                                                                   |
|---------------------------|------------------------------------------|------------------------------------------------------------------------------------------------------------------------------------------------------------------------------------------------------------------------------------------------------------------------------------------------------------------------------------------------------------------------------------------------------------------------------------------|-----------------------------------------------------------------------------------------------------------------------------------------------------------------------------------------------------------------------------------------------------------------------------------------------------------------------------------------------------------------------|--------------------------------------------------------------------------------------------------------------------------------------------------------------------|----------------------------------------------------------------------------------------------------------------------------------------------------------------------------------------------|------------------------------------------------------------------------------------------------------------------------------------------------------------------------------------------------------------------------------------------------------------------------------------------------------------------------------------------------------------------------------------------------------------------------------------------------------------------------------------------------------------------------------------|-----------------------------------------------------------------------------------------------------------------------------------------------------------------------------------------------------------------------------------------------------------------------------------------------------------------------------------------------------------------------------------------------------------------------------------------------------------------------------------------------------------------------------------------------------------------------------------|
|                           |                                          | (n=10), Smoking history (n=6), Obesity (n=3), Arrhythmia (n=2), CVD (n=2), Liver disease (n=1), Psychiatric illness (n=1), Dyslipidemia (n=1)                                                                                                                                                                                                                                                                                            |                                                                                                                                                                                                                                                                                                                                                                       | dietetic, nursing, social services, and cognitive therapies, robot-assisted and virtual reality-assisted rehabilitation according to individual prescriptions      |                                                                                                                                                                                              | Modality: resistance<br>Type: NR<br>Frequency: NR<br>Volume: NR<br>Intensity: NR<br><br>Modality: balance<br>Type: balance, gait, and body awareness training<br>Frequency: NR<br>Volume: NR<br>Intensity: NR<br><br>Total (for all modalities):<br>Frequency: 2-3x/wk for resistance and aerobic training<br>Intensity: NR but RPE (Borg scale NR) was monitored                                                                                                                                                                  | <u>Quality of life, mental health, and general state:</u><br>Ambulation capacity (FAC), Disability level (FIM)<br><br><u>Other:</u><br>FFM (bioimpedance, skinfolds and circumferences), Body weight, BMI, Functional Oral Intake Scale, Dysphagia (oropharyngeal dysphagia classification), Malnutrition (categories of the Global Leadership Initiative for Malnutrition)                                                                                                                                                                                                       |
| Li et al., 2021 [52]      | Retrospective Single group               | COV+:<br>n=16 (8f, 8m);<br>70.1±16.5 yo;<br>22.6±3.3 kg/m <sup>2</sup><br>(calculated from raw data)<br>CKD (n=10), HT (n=8), CVD (n=4), DM2 (n=4), Emphysema/COPD (n=4), Ischemic stroke (n=3), fatty liver (n=2), Alzheimer (n=2), Anemia (n=2), Hypercholesterolemia (n=1), Bile stone (n=1), Chronic renal ischemia (n=1), Hypoproteina (n=1), Breast cancer (n=1), Prostate surgery (n=1), Low toxine levels (n=1), Dysphagia (n=1) | <b>High</b><br>Hospitalization: 27.7±8.7 days (range: 11-46) (calculated from raw data)<br>ICU: 17.4±9.7 days (range: 6-38) (calculated from raw data)<br><br>Respiratory status at RP admission:<br>- Mechanical ventilation (n=3): 17.3±11.5 days (calculated from raw data)<br>- Breathing spontaneously with high-flow nasal oxygenation or nasal cannulae (n=13) | Duration between admission to hospital and the beginning of RP <sup>a</sup> : 8.9±7.7 days (calculated from raw data)<br>In the middle of the disease (during ICU) | In hospital<br><br>Physical activity, respiratory exercises, speech therapy, drug therapy<br><br>Program of physiotherapy inspired from Gosselink et al. 2011<br><br>Duration: 10.6±7.1 days | Modality: N/A<br>Type: rolling over and moving on the bed regularly, sitting up in bed, sitting on the bedside, sitting on a chair, standing, walking (along a 7m walkway)<br>Frequency: NR<br>Volume: NR<br>Intensity: SaO <sub>2</sub> >90%, Dyspnea<4 (Borg scale 0-10). [Evolution: walking program increase by 10m each day, with 2-3 short rest periods during walking]<br><br>Total (for all RP):<br>Frequency: 2x/day<br>Volume: 30-40min<br><br>For ventilated patients (n=3): only passive/assisted active limb mobility | <u>Function capacity:</u><br>Walking distance managed by patients independently or with the help of an assistant (not described as a 6MWT), Muscle strength (MRC score 1-60), Physical function (Physical Function in Intensive Care Test), Mobility (De Morton Mobility Index)<br><br><u>Respiratory function:</u><br>PaO <sub>2</sub> and FiO <sub>2</sub> (method NR), PEF (method NR), P <sub>I</sub> max (respiratory pressure meter), Dyspnea at rest (Borg Scale, probably 0-10)<br><br><u>Quality of life, mental health, and general state:</u><br>Disability level (BI) |
| Martin et al., 2021 [53]  | Prospective Controlled trial, two groups | COV+:<br>n=14 (3f, 14m);<br>60.8±10.4 yo (range: 55.6-65.9); 29.7±5.2 kg/m <sup>2</sup> (range: 27.3-32.2)<br>Comorbidities NR<br><br>CON (COV+ subjects refusing the RP):<br>n=13 (7f, 6m);<br>61.9±10.7 yo (range: 57.9-66.0); 28.1±3.9 kg/m <sup>2</sup> (range: 26.0-30.3)<br>Comorbidities NR                                                                                                                                       | <b>High</b><br>Hospitalization:<br>- COV+: 16±10 days<br>- CON: 16±9 days<br>ICU (COV+: n=4; CON: n=2)<br><br>Need for oxygen at RP admission (COV+: n=12; CON: n=12)                                                                                                                                                                                                 | Immediately after hospital discharge                                                                                                                               | Telerehabilitation (supervised and non-supervised)<br><br>Physical activity<br><br>Duration: 5 wk                                                                                            | Modality: aerobic<br>Type: NR<br>Frequency: 2x/wk<br>Volume: 30min<br>Intensity: RPE=6 (Borg scale, probably 0-10)<br><br>Modality: resistance<br>Type: upper and lower limbs (with bottle of water and a chair)<br>Frequency: 2x/wk<br>Volume: 2-3sets x 8-12rep (20min)<br>Intensity: NR<br><br>Patients were then encouraged to perform undersupervised exercises 3x/wk using provided templates.                                                                                                                               | <i>Post-RP test were performed 3 mo after the beginning of RP.</i><br><br><u>Functional capacity:</u><br>1-min STST, HR pre- and post-STST<br><br><u>Respiratory function:</u><br>SaO <sub>2</sub> and Dyspnea pre- and post-STST (VAS 1-10)                                                                                                                                                                                                                                                                                                                                      |
| Mohamed et al., 2021 [54] | Prospective Randomized controlled        | COV+:<br>n=15 (7f, 8m);<br>44.6±4.3 yo; 24.7±1.3 kg/m <sup>2</sup>                                                                                                                                                                                                                                                                                                                                                                       | <b>Moderate</b><br>Hospitalization <sup>a</sup><br>Patients with mild or moderate COVID-19 (no or low-grade fever)                                                                                                                                                                                                                                                    | Unclear, maybe during/after the acute phase                                                                                                                        | Telerehabilitation (non-supervised)                                                                                                                                                          | Modality: aerobic<br>Type: walking/running or cycling (MICT on treadmill and ergocycle)<br>Frequency: 3x/wk                                                                                                                                                                                                                                                                                                                                                                                                                        | <u>Quality of life, mental health, and general state:</u><br>QoL (Wisconsin Upper Respiratory Symptom Survey-24)<br><br><u>Biological parameters:</u>                                                                                                                                                                                                                                                                                                                                                                                                                             |

|                                      |                                          |                                                                                                                                                                                                                                                                                                                                                                                                                                                                                                                                      |                                                                                                                                                                                                                                                                                                                                                                                                                                                                                                                                   |                                                                                                         |                                                                                                                                                                                                                 |                                                                                                                                                                                                                                                                                                                                                                                                                                                                                                                                                  |                                                                                                                                                                                                                                                                                                                                                                                                                                                                       |
|--------------------------------------|------------------------------------------|--------------------------------------------------------------------------------------------------------------------------------------------------------------------------------------------------------------------------------------------------------------------------------------------------------------------------------------------------------------------------------------------------------------------------------------------------------------------------------------------------------------------------------------|-----------------------------------------------------------------------------------------------------------------------------------------------------------------------------------------------------------------------------------------------------------------------------------------------------------------------------------------------------------------------------------------------------------------------------------------------------------------------------------------------------------------------------------|---------------------------------------------------------------------------------------------------------|-----------------------------------------------------------------------------------------------------------------------------------------------------------------------------------------------------------------|--------------------------------------------------------------------------------------------------------------------------------------------------------------------------------------------------------------------------------------------------------------------------------------------------------------------------------------------------------------------------------------------------------------------------------------------------------------------------------------------------------------------------------------------------|-----------------------------------------------------------------------------------------------------------------------------------------------------------------------------------------------------------------------------------------------------------------------------------------------------------------------------------------------------------------------------------------------------------------------------------------------------------------------|
|                                      | trial, two groups                        | Smoking history (n=4) - No comorbidity<br><br>CON (COV+ without RP):<br>n=15 (8f, 7m);<br>35.3±4.0 yo; 24.0±1.2 kg/m²<br>Smoking history (n=3) - No comorbidity<br><br>Patients with other chronic diseases (such as heart problems, HT, or DT), and women with contraception were excluded.                                                                                                                                                                                                                                         |                                                                                                                                                                                                                                                                                                                                                                                                                                                                                                                                   | Physical activity, drug therapy<br><br>Duration: 2 wk for physical activity and 5 days for drug therapy | Volume: 40min<br>Intensity: 5min of warm-up + 30min 60-75%HR <sub>max</sub> (predicted: 210-age), RPE=12-14 (Borg scale 6-20) + 5min of cool-down                                                               | Lymphocytes, Leukocytes, IL-6, IL-10, TNF-α (blood samples), IgA-S concentration (salivary samples)                                                                                                                                                                                                                                                                                                                                                                                                                                              |                                                                                                                                                                                                                                                                                                                                                                                                                                                                       |
| Ozyemisci Taskiran et al., 2021 [55] | Prospective Controlled trial, two groups | COV+:<br>n=18 (7f, 11m);<br>median: 73 yo (range: 55-91); median: 24.8 kg/m² (range: 16.0-39.1)<br>Chronic pulmonary disease (n=8, and among them: Interstitial lung disease (n=3), Cancer (n=2), COPD (n=2), Tuberculosis (n=1)), HT (n=7), DM (n=6), Cancer (n=6), Coronary artery disease (n=5), Neurologic disease (n=4)<br><br>CON (COV+ without RP):<br>n=17 (4f, 13m);<br>median: 70 yo (range: 49-88); median: 29.4 kg/m² (range: 22.8-39.7)<br>HT (n=10), DM (n=6), Coronary artery disease (n=5), Cancer (n=2), COPD (n=1) | <b>High</b><br>Hospitalization:<br>- COV+: median: 27 days (range: 6-52)<br>- CON: median: 16 days (range: 8-26)<br>ICU:<br>- COV+: median: 16 days (range: 2-30)<br>- CON: median: 9 days (range: 1-20)<br>Stay in ICU≤5 days (COV+: n=5; CON: n=6)<br>Invasive mechanical ventilation:<br>- COV+ (n=13): median: 17 days (range: 5-27)<br>- CON (n=13): median: 7 days (range: 1-19)<br><br>COVID-19 complications: Pressure ulcers (COV+: n=13; CON: n=8), Co-infection (COV+: n=12; CON: n=8), Sepsis (COV+: n=10; CON: n=11) | During ICU (≥5 days of the ICU stays, ≥10 days after the onset of symptoms)                             | In hospital (ICU)<br><br>Physical activity, drug therapy<br><br>Number of sessions: median 6 (range: 2-14)<br><br>Effective program in n=11 patients (who fulfilled the inclusion criteria and ICU stay>5 days) | <u>For invasively mechanically ventilated and sedated patients:</u><br>Modality: N/A<br>Type: passive range of motion exercises<br>Frequency: 6x/wk<br>Volume: 10-15rep (15min)<br>Intensity: NR<br><br><u>For non-invasively mechanically ventilated patients:</u><br>Modality: N/A<br>Type: active-assistive or active range of motion exercises in-bed according to their condition, including sitting unsupported, sit to stand and walking (commenced following their transfer to the ward)<br>Frequency: NR<br>Volume: NR<br>Intensity: NR | <u>Functional capacity:</u><br>Handgrip, Muscle strength (MRC score 1-60)<br><br><u>Quality of life, mental health, and general state:</u><br>Physical function, Pain, Role limitations-physical, Role limitations-emotional, Mental health, Tremor in the hands, Social functioning, Energy, QoL (SF-36)                                                                                                                                                             |
| Pancera et al., 2021 [56]            | Retrospective Case series                | COV+:<br>n=7 (7m); 48.3±8.7 yo (range: 37-61); 24.7±3.7 kg/m² (calculated from raw data)<br>Smoking history (n=7), HT (n=4)                                                                                                                                                                                                                                                                                                                                                                                                          | <b>High</b><br>ICU: 18.4±2.8 days (calculated from raw data)<br>Tracheostomy: 8.4±3.6 days (calculated from raw data)<br><br>Patients still positived for COVID-19, requiring mechanical ventilation (n=6) and isolated in a COVID unit at RP admission (T0)                                                                                                                                                                                                                                                                      | During the acute phase                                                                                  | In hospital (rehabilitation center)<br><br>Physical activity, electrostimulation, respiratory exercises<br><br>Duration: 2-5 wk<br><br>Calculated from raw data:<br>- T0 to T1: 11±5 sessions                   | Modality: aerobic (as soon as possible)<br>Type: walking (with or without ambulatory assisting), climbing and descending stairs (from T1), cycling (ergocycle) (from T1)<br>Frequency: NR<br>Volume: 30min for cycling<br>Intensity: 20W, RPE=4-6 (probably Borg scale 0-10) for cycling                                                                                                                                                                                                                                                         | <i>Tests were performed at pre-RP, at the end of T1, and at the end of T2 (post-RP).</i><br><br><u>Functional capacity:</u><br>Muscle strength (MRC score 1-60), SPPB (score 0-12 from 3 tests: static body balance, ability to walk and stand up from a chair)<br><br><u>Rerspiratory function:</u><br>PI <sub>max</sub> and PE <sub>max</sub> (MicroRPM - Respiratory Pressure Meter - at T1 and T2 only)<br><br>Quality of life, mental health, and general state: |

|                          |                               |                                                                                                                                                                                                                      |                                                                                                                                                                                                                                                                                                                                                                             |                                                                                                                                       |                                                                                                                                                                                                                                                  |  |                                                                                                                                                                                                                                                                                                                                                                                                                                                                                                                                                                                                                                                                                                                                                                  |                                                                                                                                                                                                                                                                                                                                                                                                                                                                                              |
|--------------------------|-------------------------------|----------------------------------------------------------------------------------------------------------------------------------------------------------------------------------------------------------------------|-----------------------------------------------------------------------------------------------------------------------------------------------------------------------------------------------------------------------------------------------------------------------------------------------------------------------------------------------------------------------------|---------------------------------------------------------------------------------------------------------------------------------------|--------------------------------------------------------------------------------------------------------------------------------------------------------------------------------------------------------------------------------------------------|--|------------------------------------------------------------------------------------------------------------------------------------------------------------------------------------------------------------------------------------------------------------------------------------------------------------------------------------------------------------------------------------------------------------------------------------------------------------------------------------------------------------------------------------------------------------------------------------------------------------------------------------------------------------------------------------------------------------------------------------------------------------------|----------------------------------------------------------------------------------------------------------------------------------------------------------------------------------------------------------------------------------------------------------------------------------------------------------------------------------------------------------------------------------------------------------------------------------------------------------------------------------------------|
|                          |                               |                                                                                                                                                                                                                      |                                                                                                                                                                                                                                                                                                                                                                             |                                                                                                                                       | (range: 6-20)<br>- T1 to T2: 9±4 sessions<br>(range: 0-17)                                                                                                                                                                                       |  | [Evolution: increase of 10W when RPE and dyspnea<4]<br><br>Modality: resistance (as soon as possible)<br>Type: sit-to-stand, strength exercises with elastic bands or free weights (from T1)<br>Frequency: NR<br>Volume: 5-10rep for sit-to-stand, 2sets x 20rep for strength exercises<br>Intensity: NR for sit-to-stand, 50%1RM for strength exercises<br>[Evolution: 2sets x 10rep at 70%1RM for strength exercises]<br><br>Total (for all RP):<br>Frequency: 5x/wk<br>Volume: 45min                                                                                                                                                                                                                                                                          | QoL (EDQ5 3 levels), Disability status (BI, BI based on dyspnea)<br><br>Other:<br>BMI, Quadriceps girth (10cm above the patella)                                                                                                                                                                                                                                                                                                                                                             |
| Patel et al., 2021 [57]  | Retrospective<br>Single group | COV+:<br>n=106 (27f, 79m);<br>64±14 yo; NR<br>Vascular or metabolic disease (n=43),<br>History of cognitive disorder (n=6)                                                                                           | <b>High</b><br>Hospitalization: 53±28 days<br>ICU (most of patients): 35±24 days<br>Intubation: median: 13 [IQR: 0, 20.5] days<br>Tracheostomy (n=33)                                                                                                                                                                                                                       | Probably immediately after acute hospital discharge                                                                                   | In hospital (COVID-19 recovery unit)<br><br>Physical activity, occupational therapy, and if necessary, speech-language therapy, neuropsychology, psychiatry, neurology, and pulmonology consultation, swallow therapy<br><br>Duration: 17±9 days |  | Modality: aerobic<br>Type: cycling (sitting ergocycle), walking<br>Frequency: NR<br>Volume: 10 steps at a time for walking<br>Intensity: NR<br><br>Modality: resistance<br>Type: upper and lower limbs ('TherEx with/without TheraBands', 'TheraBands', 'NutStep', free weight, weight bearing). Eccentric movements are favoured while isometric and concentric movements are limited.<br>Frequency: NR<br>Volume: NR<br>Intensity: NR<br><br>Modality: balance<br>Type: standing reaching tasks, dribble soccer ball, shoot basketball<br>Frequency: NR<br>Volume: NR<br>Intensity: NR<br><br>Total (for all modalities):<br>Frequency: 2-3x/wk to 5-6x/wk<br>Volume: 30min to 60-90min<br>Intensity: rest breaks based on HR and SaO <sub>2</sub> of patients | <u>Functional capacity:</u><br>Distance ambulated<br><br><u>Respiratory function:</u><br>Respiratory status<br><br><u>Quality of life, mental health, and general state:</u><br>QoL (AMPAC for basic mobility, AMPAC for daily activities), Ambulatory status                                                                                                                                                                                                                                |
| Piquet et al., 2021 [58] | Retrospective<br>Single group | COV+:<br>n=100 (34f, 66m);<br>median: 66 [IQR: 22] <sup>a</sup> yo; 26.0±5.4 kg/m <sup>2</sup><br>HT (n=48 <sup>a</sup> ), DM (n=29), Renal failure (n=13), Stroke (n=9), Immunosuppression (n=3), Coronapathy (n=1) | <b>Moderate-to-High</b><br>No-ICU hospitalization (n=77): 11.7±6.5 days<br>Need for nasal oxygen <sup>a</sup> (n=77)<br>ICU (n=23): 13.8±9.0 days<br>Hospitalization after ICU (n=23): 10.2±4.9 days<br>Intubation (n=13): 8.2±8.5 days<br><br>Need for nasal oxygen at RP admission <sup>a</sup> (n=58)<br>Symptoms/complications due to COVID-19 at RP admission: Dyspnea | Duration between onset of symptoms and admission in RP <sup>a</sup> : 20.4±10.0 days (unclear if it is mean and SD or median and IQR) | In hospital (COVID-19 rehabilitation unit)<br><br>Physical activity, respiratory exercises, education, occupational therapy, speech therapy, psychology therapy<br><br>Duration: 9.8±5.1 <sup>a</sup> days                                       |  | Modality: aerobic<br>Type: cycling (ergocycle), 'pedal boards', arm ergometer<br>Frequency: NR<br>Volume: NR<br>Intensity: 'submaximal'<br><br>Modality: resistance<br>Type: sit-to-stand, tiptoe stand, squats (elastic bands, weights, dumbbells)<br>Frequency: NR<br>Volume: 3sets x 10rep for each exercise (depending on patients')                                                                                                                                                                                                                                                                                                                                                                                                                         | <i>Among included patients, functional outcome criteria were analyzed for lengths of stay ≥72h</i><br><br><u>Functional capacity:</u><br>10-rep STST (time to perform 10 full sit-to-stands; when 10 STST could not be completed, the number of completions in 1min was collected), HR, and RPE (Borg scale, probably 0-10) pre and post-STST, Handgrip<br><br><u>Respiratory function:</u><br>Respiratory rate (method NR) and SaO <sub>2</sub> pre- and post-STST, Need for oxygen therapy |

|                                    |                                                     |                                                                                                                                                                                                                                                                                                                                                                                                                                                    |                                                                                                                                                                                   |                                                                                                 |                                                                                                                                                                                                                                                                                           |                                                                                                                                                                                                                                                                                                                                                                                                                                                                                                                                                                                                                                                                                         |                                                                                                                                                                                                                                                                                                                                                                                                                             |
|------------------------------------|-----------------------------------------------------|----------------------------------------------------------------------------------------------------------------------------------------------------------------------------------------------------------------------------------------------------------------------------------------------------------------------------------------------------------------------------------------------------------------------------------------------------|-----------------------------------------------------------------------------------------------------------------------------------------------------------------------------------|-------------------------------------------------------------------------------------------------|-------------------------------------------------------------------------------------------------------------------------------------------------------------------------------------------------------------------------------------------------------------------------------------------|-----------------------------------------------------------------------------------------------------------------------------------------------------------------------------------------------------------------------------------------------------------------------------------------------------------------------------------------------------------------------------------------------------------------------------------------------------------------------------------------------------------------------------------------------------------------------------------------------------------------------------------------------------------------------------------------|-----------------------------------------------------------------------------------------------------------------------------------------------------------------------------------------------------------------------------------------------------------------------------------------------------------------------------------------------------------------------------------------------------------------------------|
|                                    |                                                     | Age>70 yo (n=41), BMI>30 (n=17)                                                                                                                                                                                                                                                                                                                                                                                                                    | (n=79), Asthenia (n=76), Fever (n=73), Cough (n=64), Myalgia (n=33), Diarrhea (n=25), Ageusia (n=16), Headache (n=14), Anosmia (n=13), Pulmonary embolism (n=4), Thrombosis (n=1) |                                                                                                 |                                                                                                                                                                                                                                                                                           | abilities)<br>Intensity: NR                                                                                                                                                                                                                                                                                                                                                                                                                                                                                                                                                                                                                                                             | Quality of life, mental health, and general state:<br>Disability level (BI)                                                                                                                                                                                                                                                                                                                                                 |
|                                    |                                                     |                                                                                                                                                                                                                                                                                                                                                                                                                                                    | At the time of the diagnosis: 26% had more than 50% pulmonary damage on CT scans.                                                                                                 |                                                                                                 |                                                                                                                                                                                                                                                                                           | Total (for all modalities):<br>Frequency: 2x/day, 5days/wk<br>Volume: <20min                                                                                                                                                                                                                                                                                                                                                                                                                                                                                                                                                                                                            |                                                                                                                                                                                                                                                                                                                                                                                                                             |
| Puchner et al., 2021 [59]          | Prospective<br>Single group                         | COV+:<br>n=23 (7f, 16m);<br>57±10 yo; 27±4 kg/m <sup>2</sup><br>Overweight/obesity (n=15), CVD (n=11), Endocrine disease (n=11), HT (n=9), DM2 (n=6), Pulmonary disease (n=5), CKD (n=3), Cancer (n=3), Immunodeficiency (n=3), Asthma (n=3), Chronic liver disease (n=2), Hypercholesteromia (n=2), COPD (n=1), No comorbidity (n=3)                                                                                                              | <b>Moderate-to-High</b><br>Hospitalization: 32±16 days<br>ICU: 19±14 days<br>Need for oxygen therapy (n=20)<br>Mechanical ventilation (n=19)                                      | Immediately after hospital discharge<br>44±33 days after onset of infection (range: 20-70 days) | In hospital (rehabilitation clinic)<br><br>Physical activity, respiratory exercises, logopaedics and swallow evaluation, nutritional counseling, passive therapy sessions (e.g. massage)<br><br>Duration: 3-4 wk (24±5 days)<br>Total duration for physical activity program: 441±204 min | Modality: aerobic<br>Type: MICT, HIIT<br>Frequency: NR<br>Volume: 20min (MICT) or 26min (HIIT)<br>Intensity:<br>- MICT: 50%P <sub>max</sub><br>- HIIT: 8min 30%P <sub>max</sub> (warm-up), 12sets x [30s 100%P <sub>max</sub> /30s 0-20%P <sub>max</sub> ], 6min 20%P <sub>max</sub> (cooling-down)<br>[Evolution: RPE (Borg scale 6-20) was used to ease or progress intensity] (P <sub>max</sub> based on CPET)<br><br>Modality: resistance<br>Type: machines, bodyweight, elastic bands, dumbbells<br>Frequency: NR<br>Volume: NR<br>Intensity: NR                                                                                                                                   | <u>Functional capacity:</u><br>6MWT<br><br><u>Respiratory function:</u><br>FVC, FEV1, FEV1/FVC, TLC, RV, DLCO, PI <sub>max</sub> , PaO <sub>2</sub> , PaCO <sub>2</sub> , pH (blood samples, plethysmography, spirometry)<br><br><u>Quality of life, mental health, and general state:</u><br>Disability level (BI)                                                                                                         |
| Rodriguez-Blanco et al., 2021 [60] | Prospective<br>Controlled Trial (Pilot), two groups | COV+:<br>n=18 (9f, 9m);<br>39.4±11.7 <sup>a</sup> yo (f: 42.3±11.5 yo; m: 36.4±11.9 yo); NR<br>No comorbidity<br><br>CON (COV+ without RP):<br>n=18 (10f, 8m);<br>41.3±12.1 yo (f: 41.1±11.4 yo; m: 41.6±13.8 yo); NR<br>No comorbidity<br><br>Groups comparison: age (p<0.1)<br><br>Subjects with previously comorbidities (e.g. CKD, CVD, neurological disorders), or patients received a physical treatment in the previous 3 mo were excluded. | <b>Low</b><br>No hospitalization (mild-to-moderate symptoms)                                                                                                                      | During the acute phase                                                                          | Telerehabilitation (supervised and non-supervised)<br><br>Physical activity<br><br>Duration: 7 days                                                                                                                                                                                       | Modality: resistance<br>Type: 10 exercises based on non-specific toning exercises (free weight or light weights such as water bottles)<br>-<br><a href="https://www.fisiosurid.com/ejercicios-proyecto-COVID/">https://www.fisiosurid.com/ejercicios-proyecto-COVID/</a><br>Frequency: 1x/day, 7x/wk<br>Volume:<br>- 4rep if RPE=7-10 (Borg scale 0-10) on the 30-s STST (10min)<br>- 8rep if RPE=5-7 on the 30-s STST (20min)<br>- 12rep if RPE=1-5 on the 30-s STST (30min)<br>Intensity: NR<br><br>Supervised sessions 2x/wk by visioconference + text message daily for follow-up. No combination of the following program with other physical therapy or sports physical activity. | <i>Tests were performed pre- and post-RP, and 1 wk post-RP.</i><br><br><u>Functional capacity:</u><br>6MWT (self-administrated by the patient at home using the app "StepsApp" which recorded the number of steps), 30-s STST, RPE post-30-s STST (Borg scale, probably 0-10)<br><br>Patients were instructed and telematically controlled by the study evaluator who provided patients the necessary assessment materials. |
| Saeki et al., 2021 [61]            | Prospective<br>Case series                          | COV+:<br>n=4 (m); 55.8±17.3 yo (range: 30-67);<br>26.5±1.7 kg/m <sup>2</sup><br>HT (n=2), DM2                                                                                                                                                                                                                                                                                                                                                      | <b>High</b><br>Hospitalization: 32±2 days (range: 29-34)<br>ICU: 19±2 days (range: 16-21)                                                                                         | During hospitalization (started in ICU)                                                         | In hospital and then telerehabilitation (non-supervised)<br><br>Physical activity (from                                                                                                                                                                                                   | <u>Before hospital discharge:</u><br>Modality: aerobic<br>Type: stepping, gait exercises, cycling (ergocycle)<br>Frequency: NR                                                                                                                                                                                                                                                                                                                                                                                                                                                                                                                                                          | <i>Tests were performed at ICU discharge, at hospital discharge, 1 mo and 6 mo after hospital discharge.</i><br><br><u>Functional capacity:</u><br>6MWT, Muscle strength (MRC score 1-60), Gait speed                                                                                                                                                                                                                       |

|                                |                                            |                                                                                                                                                                                                                                                                                                                                                                                                                                                                                                                                           |                                                        |                        |                                                                                                                                                                                                                                                                                                                                                                                                                                                                                                   |                                                                                                                                                                                                                                                                                                                                                                                                                                                                                                                                                                                                                                                                  |                                                                                                                         |
|--------------------------------|--------------------------------------------|-------------------------------------------------------------------------------------------------------------------------------------------------------------------------------------------------------------------------------------------------------------------------------------------------------------------------------------------------------------------------------------------------------------------------------------------------------------------------------------------------------------------------------------------|--------------------------------------------------------|------------------------|---------------------------------------------------------------------------------------------------------------------------------------------------------------------------------------------------------------------------------------------------------------------------------------------------------------------------------------------------------------------------------------------------------------------------------------------------------------------------------------------------|------------------------------------------------------------------------------------------------------------------------------------------------------------------------------------------------------------------------------------------------------------------------------------------------------------------------------------------------------------------------------------------------------------------------------------------------------------------------------------------------------------------------------------------------------------------------------------------------------------------------------------------------------------------|-------------------------------------------------------------------------------------------------------------------------|
|                                |                                            | (n=1), Bullous pemphigoid (n=1), No comorbidity (n=2)                                                                                                                                                                                                                                                                                                                                                                                                                                                                                     | Mechanic ventilation: 16±3 days (range: 13-19)         |                        | ICU to the end of rehabilitation), positioning and postural drainage, passive exercises (from ICU to hospital discharge)                                                                                                                                                                                                                                                                                                                                                                          | Volume: NR<br>Intensity: NR<br><br>Modality: resistance<br>Type: muscle power training<br>Frequency: NR<br>Volume: NR<br>Intensity: NR<br><br><u>Total (for all modalities before hospital discharge):</u><br>Frequency: 1x/day<br>Volume: 40min<br><br><u>After hospital discharge (telerehabilitation):</u><br>Modality: aerobic<br>Type: walking<br>Frequency: NR<br>Volume: NR<br>Intensity: NR<br><br>Modality: resistance<br>Type: lower limbs (closed kinetic chain exercises), upper limbs (Thera-Band)<br>Frequency: NR<br>Volume: NR<br>Intensity: NR<br><br>Modality: balance<br>Type: NR<br>Frequency: NR<br>Volume: NR<br>Intensity: NR             | <u>Quality of life, mental health, and general state:</u><br>Disability level (BI), SaO <sub>2</sub> pre- and post-6MWT |
| Spielmanns et al., 2021 a [62] | Retrospective Controlled trial, two groups | COV+ (tested positive for COVID-19 during RP and were temporary isolated):<br>n=27 (9f, 18m);<br>71.5±12.3 yo;<br>25.3±5.5 kg/m <sup>2</sup><br>Stroke (n=19), HT (n=18), CKD (n=11), Dislipidemia (n=10), DM2 (n=9), Smoking history (n=8), COPD (n=6), Coronary artery disease (n=5), Peripheral artery disease (n=0)<br>CIRS: 17.2±6.6<br><br>COV- (needing RP before and during COVID-19 pandemic):<br>n=786 (399f, 387m);<br>71.5±13.1 yo;<br>25.9±5.8 kg/m <sup>2</sup><br>Stroke (n=541), HT (n=512), Smoking history (n=347), CKD | <b>Low-to-Moderate</b><br>Need for oxygen (COV+: n=10) | During the acute phase | In hospital (single-center inpatient rehabilitation center)<br><br>Physical activity, and if necessary, occupational, speech, and neuropsychological therapy<br>Specifically during isolation intervention (positive COVID-19 patients) if necessary: dysphagia beside assessments, respiratory exercises, psychological support, massages, nutrition and diabetes counseling, social services, etc.<br><br>Duration:<br>- COV+: 54±24 days<br>- CON: 32±18 days<br>Groups comparison:<br>p<0.001 | <u>Normal program (COV- and COV+ after negative COVID-19 swab):</u><br>Modality: aerobic<br>Type: NR<br>Frequency: NR<br>Volume: NR<br>Intensity: NR<br><br>Modality: resistance<br>Type: circuit training if possible<br>Frequency: NR<br>Volume: 3sets x 10-15rep<br>Intensity: 10-15RM<br><br>Modality: coordination<br>Type: circuit training if possible<br>Frequency: NR<br>Volume: 3sets x 10-15rep<br>Intensity: 10-15RM<br><br><u>Total (for all modalities for the normal program):</u><br>Frequency: 4-6x/wk for individual sessions + NR for group sessions<br>Volume: 30-45min<br><br><u>During isolation (only for COV+):</u><br>Modality: aerobic | <u>Quality of life, mental health, and general state:</u><br>Disability level (FIM)                                     |

|                                |                                                                                      |                                                                                                                                                                                                                                                                                                                                                                                                                                                                                                                                                                                                    |                                                                                                                         |                                                                                                                |                                                                                                                                                                                                                                                                                                                                                                                                                                              |                                                                                                                                                                                                                                                                                                                                                                                                                                                                                                                                                                                                       |                                                                                                                      |
|--------------------------------|--------------------------------------------------------------------------------------|----------------------------------------------------------------------------------------------------------------------------------------------------------------------------------------------------------------------------------------------------------------------------------------------------------------------------------------------------------------------------------------------------------------------------------------------------------------------------------------------------------------------------------------------------------------------------------------------------|-------------------------------------------------------------------------------------------------------------------------|----------------------------------------------------------------------------------------------------------------|----------------------------------------------------------------------------------------------------------------------------------------------------------------------------------------------------------------------------------------------------------------------------------------------------------------------------------------------------------------------------------------------------------------------------------------------|-------------------------------------------------------------------------------------------------------------------------------------------------------------------------------------------------------------------------------------------------------------------------------------------------------------------------------------------------------------------------------------------------------------------------------------------------------------------------------------------------------------------------------------------------------------------------------------------------------|----------------------------------------------------------------------------------------------------------------------|
| Spielmanns et al., 2021 b [63] | Prospective and retrospective (in function of group)<br>Controlled trial, two groups | (n=301), Dislipidemia (n=259), DM2 (n=212), COPD (n=159), Coronary artery disease (n=159), Peripheral artery disease (n=89)<br>CIRS: 16.9±5.8                                                                                                                                                                                                                                                                                                                                                                                                                                                      |                                                                                                                         |                                                                                                                |                                                                                                                                                                                                                                                                                                                                                                                                                                              | Type: cycling (ergocycle), stepping (stepper), and other ergometers<br>Volume: NR<br>Frequency: NR<br>Intensity: NR                                                                                                                                                                                                                                                                                                                                                                                                                                                                                   |                                                                                                                      |
|                                |                                                                                      |                                                                                                                                                                                                                                                                                                                                                                                                                                                                                                                                                                                                    |                                                                                                                         |                                                                                                                |                                                                                                                                                                                                                                                                                                                                                                                                                                              | Modality: resistance<br>Type: elastic bands (in patient's room)<br>Volume: NR<br>Frequency: NR<br>Intensity: NR                                                                                                                                                                                                                                                                                                                                                                                                                                                                                       |                                                                                                                      |
|                                |                                                                                      |                                                                                                                                                                                                                                                                                                                                                                                                                                                                                                                                                                                                    |                                                                                                                         |                                                                                                                |                                                                                                                                                                                                                                                                                                                                                                                                                                              | <u>Total (for all modalities for the isolation program):</u><br>Frequency: 1-2x/day<br>Volume: 15-45min                                                                                                                                                                                                                                                                                                                                                                                                                                                                                               |                                                                                                                      |
|                                |                                                                                      |                                                                                                                                                                                                                                                                                                                                                                                                                                                                                                                                                                                                    |                                                                                                                         |                                                                                                                |                                                                                                                                                                                                                                                                                                                                                                                                                                              | Modality: aerobic<br>Type: cycling (IT on ergocycle), walking (IT on treadmill) (Partially bedridden patients: started with in-bed cycling, walking with aids and then IT cycling)<br>Frequency: 5-6x/wk<br>Volume: 5-35min [Evolution: increase of duration in function of patient level]<br>Intensity:<br>- 6MWT<200m (n=58): cycling only, 30-60s at 55-70%HR <sub>max</sub> / 60s low intensity (RPE=4-6, Borg scale 0-10)<br>- 6MWT>200m: 80% of 6MWT speed (RPE<6)<br>Interrupted exercise if SaO <sub>2</sub> <88% or RPE>6.<br>(NR if HR <sub>max</sub> is estimated or previously evaluated) |                                                                                                                      |
|                                |                                                                                      |                                                                                                                                                                                                                                                                                                                                                                                                                                                                                                                                                                                                    |                                                                                                                         |                                                                                                                |                                                                                                                                                                                                                                                                                                                                                                                                                                              | Modality: aerobic<br>Type: outdoor walking<br>Frequency: 2-3x/wk<br>Volume: 45min<br>Intensity: level 1 (slow pace with little incline of the terrain) to level 3 (faster pace with frequent inclines)                                                                                                                                                                                                                                                                                                                                                                                                | <u>Functional capacity:</u><br>6MWT                                                                                  |
|                                |                                                                                      | COV+:<br>n=99 (42f, 57m);<br>67.7±10.2 yo;<br>28.2±6.1 kg/m²<br>HT (n=54), Smoking history (n=27),<br>Overweight/obesity (n=25),<br>Musculoskeletal disease (n=25),<br>Dyslipidemia (n=20),<br>Neurological disease (n=20), CKD (n=19),<br>Coronary artery disease (n=18),<br>Cancer (n=15), COPD (n=11),<br>Cerebrovascular insufficiency (n=9),<br>Atrial fibrillation (n=8), Obstructive sleep apnea (n=7),<br>Chronic heart failure (n=6),<br>Venous thromboembolism (n=5),<br>Interstitial lung disease (n=5),<br>Liver disease (n=5)<br>In average 3 comorbidities/patient<br>CIRS: 14.2±5.9 | <b>Moderate-to-High</b><br>Hospitalization (included ICU): 26±9 days<br>ICU (n=65): 11±13 days<br>Ventilation: 7±9 days | Immediately after hospital discharge, after being asymptomatic for 2 days and 10 days after onset of infection | In hospital (single-center inpatient rehabilitation center)<br><br>Physical activity, respiratory and relaxation exercises, education (1h twice a wk), and if necessary, smoking cessation program, psychosocial support or diabetes advices<br><br>Duration:<br>- Total groups: 3 wk (25-30 therapy sessions on 5-6 weekdays)<br>- COV+: median: 20 days [IQR: 18, 22]<br>- CON: median: 21 days [IQR: 18, 21]<br>Groups comparison: p<0.05 | Interrupted exercise if SaO <sub>2</sub> <88% or RPE>6.<br>(NR if HR <sub>max</sub> is estimated or previously evaluated)                                                                                                                                                                                                                                                                                                                                                                                                                                                                             | <u>Quality of life, mental health and general status:</u><br>Disability level (FIM), Wellbeing (feeling thermometer) |
|                                |                                                                                      | COV- (patients with lung disease in year 2019):<br>n=419 (213f, 206m);<br>69.3±11.3 yo;<br>24.5±6.1 kg/m²<br>CIRS: 14.5±5.6                                                                                                                                                                                                                                                                                                                                                                                                                                                                        |                                                                                                                         |                                                                                                                |                                                                                                                                                                                                                                                                                                                                                                                                                                              | Modality: resistance<br>Type: large muscle groups<br>Frequency: 3-4x/wk<br>Volume: 30min, 3sets x 8-12rep per exercise (3-5 exercises in total)<br>Intensity: NR                                                                                                                                                                                                                                                                                                                                                                                                                                      |                                                                                                                      |
|                                |                                                                                      | Groups comparison:<br>BMI (p<0.001)                                                                                                                                                                                                                                                                                                                                                                                                                                                                                                                                                                |                                                                                                                         |                                                                                                                |                                                                                                                                                                                                                                                                                                                                                                                                                                              | Modality: 'gymnastics'<br>Type: mixture of exercises to improve endurance, strength, coordination range of motion, balance<br>Frequency: 5-6x/wk<br>Volume: 45min<br>Intensity: level 1 (sitting position with several breaks) to level 3 (standing position or walking with very few or no breaks)                                                                                                                                                                                                                                                                                                   |                                                                                                                      |
|                                |                                                                                      |                                                                                                                                                                                                                                                                                                                                                                                                                                                                                                                                                                                                    |                                                                                                                         |                                                                                                                |                                                                                                                                                                                                                                                                                                                                                                                                                                              | Total (for all modalities):                                                                                                                                                                                                                                                                                                                                                                                                                                                                                                                                                                           |                                                                                                                      |

Functional capacity:  
6MWT

Quality of life, mental health and general status:  
Disability level (FIM), Wellbeing (feeling thermometer)

|                           |                             |                                                                                                                                                                                                                                                                                                                                                                                                                                               |                                                                                                                                                                                                                             |                               |                                                                                                                                                                                                                                                                                          |                                                                                                                                                                                                                                                                                                                                                                                                                                                                                                                                  |                                                                                                                                                                                                                                                                                                                                                                                                                                                                                                                                                                                                                                                                                                                                  |
|---------------------------|-----------------------------|-----------------------------------------------------------------------------------------------------------------------------------------------------------------------------------------------------------------------------------------------------------------------------------------------------------------------------------------------------------------------------------------------------------------------------------------------|-----------------------------------------------------------------------------------------------------------------------------------------------------------------------------------------------------------------------------|-------------------------------|------------------------------------------------------------------------------------------------------------------------------------------------------------------------------------------------------------------------------------------------------------------------------------------|----------------------------------------------------------------------------------------------------------------------------------------------------------------------------------------------------------------------------------------------------------------------------------------------------------------------------------------------------------------------------------------------------------------------------------------------------------------------------------------------------------------------------------|----------------------------------------------------------------------------------------------------------------------------------------------------------------------------------------------------------------------------------------------------------------------------------------------------------------------------------------------------------------------------------------------------------------------------------------------------------------------------------------------------------------------------------------------------------------------------------------------------------------------------------------------------------------------------------------------------------------------------------|
| Stavrou et al., 2021 [64] | Prospective<br>Single group | COV+:<br>n=20 (5f, 15m);<br>64.1±9.9 yo; 30.3±4.3 kg/m <sup>2</sup><br>HT (n=13), DM (n=4), Smoking history (n=2), COPD (n=2), CVD (n=2)                                                                                                                                                                                                                                                                                                      | <b>Moderate-to-High</b><br>Hospitalization: 15±15 days<br>ICU (n=4)                                                                                                                                                         | 2 mo after hospital discharge | Telerehabilitation (no-supervised)<br><br>Physical activity, stretching, respiratory exercises (yoga), nutritional personalized recommendations<br><br>Duration: 8 wk                                                                                                                    | Frequency: max 4x/day for Monday to Friday, 1x/day for Saturday<br>Modality: aerobic<br>Type: walking (on flat and hard surface)<br>Frequency: 3x/wk<br>Volume: 50min<br>Intensity: initially 75%HR <sub>peak</sub> (wk 1) and increase until 110%HR <sub>peak</sub> (wk 8) [Evolution: +5% every wk] / initially leg fatigue=2 (Borg scale 0-10) and dyspnea=3 (Borg scale 0-10) (wk 1) [Evolution: increase until leg fatigue=6 and dyspnea=6 (wk 7)] (HR <sub>peak</sub> evaluated during 6MWT)                               | <u>Functional capacity:</u><br>6MWT, HR, blood pressure pre-, post- and 1min post-6MWT, Lower extremity fatigue (Borg scale) pre- and post-6MWT, HR during 6MWT, 30-s STST, HR pre- and post-30-s STST, Handgrip                                                                                                                                                                                                                                                                                                                                                                                                                                                                                                                 |
|                           |                             |                                                                                                                                                                                                                                                                                                                                                                                                                                               |                                                                                                                                                                                                                             |                               |                                                                                                                                                                                                                                                                                          | Modality: resistance<br>Type: dumbbell side lateral raises (a), dumbbell squats (b), chair lunges (c), seated leg raises (d), elbow flexion-extension on the chest with medecin ball (e)<br>Frequency: 3x/wk<br>Volume: 2sets x 12rep for (a) and (b) (wk 1-2) [Evolution: increase until 3sets x 16rep for all exercises (wk 8)] (20min)<br>Intensity: (a): 1.5kg, (e): 2kg, (b), (c), (d): body weight                                                                                                                         | <u>Respiratory function:</u><br>FVC, FEV1 and DLCO (spirometry, pneumotachograph), Dyspnea (Borg scale 0-10) pre- and post-6MWT, SaO <sub>2</sub> pre-, post- and 1min post-6MWT, SaO <sub>2</sub> during 6MWT, SaO <sub>2</sub> pre- and post-30-s STST, Chest circumference difference between maximal inhalation and exhalation<br><br><u>Quality of life, mental health and general status:</u><br>Sleep quality (PSQI)<br><br><u>Biological parameters:</u><br>ROS and Plasma antioxidant capacity (blood samples)<br><br><u>Other:</u><br>BMI, Neck circumference, Circumference differences between right and left Arm, Thigh, and Calf, FM, Visceral FM and Muscle mass (impedancemetry), Rest metoblic rate (method NR) |
| Steere et al., 2021 [65]  | Prospective<br>Three groups | Total groups (COV+):<br>n=102 (44f, 58m);<br>59.5±13.7 yo; NR<br>HT (n=56), Obesity (n=50), Smoking history (n=28), CVD (n=26), Chronic lung disease (n=16), CKD (n=15), Depression (n=14), Other mental health (n=12), Immunosuppression (n=9), Cancer (n=5), Dementia (n=2), Liver disease (n=1)<br><br>Participants were divided in 3 groups in function of the rehabilitation location, but we extracted the results only for all groups. | <b>Moderate-to-High</b><br>Hospitalization: 15.2±10.8 days<br>ICU (n=38)<br>Mechanical ventilation (n=36): 14.9±6.4 days                                                                                                    | Unclear                       | Telerehabilitation (supervised and no-supervised)<br><br>Physical activity, respiratory exercises, advices for mental health<br>In addition, psychologist telehealth, occupational and speech therapy were coordinated based on identified patient needs.<br><br>Duration: 14.6±9.6 days | Warm-up and recovery for each session: 3 exercises of stretching<br>Modality: aerobic<br>Type: walking<br>Frequency: 5x/day (wk 1), 3x/day (wk 2), 2x/days (wk 3)<br>Volume: 5min (wk 1), 10min (wk 2), 15min (wk 3)<br>Intensity: NR                                                                                                                                                                                                                                                                                            | <u>Functional capacity:</u><br>2-min step test, 30-s STST                                                                                                                                                                                                                                                                                                                                                                                                                                                                                                                                                                                                                                                                        |
|                           |                             |                                                                                                                                                                                                                                                                                                                                                                                                                                               |                                                                                                                                                                                                                             |                               |                                                                                                                                                                                                                                                                                          | Modality: resistance<br>Type: circuit training detailed in a guide for the patients (sit to stand, standing walk, shoulder caption, standing heel raises, sidestepping, wall pushups) or detailed in videos on Internet (for phase 4)<br>Frequency: 1 cycle 4x/day everyday (phase 1); 2 cycles 2x/day, 6x/wk (phase 2); 3 cycles 2x/day, 6x/wk (phase 3)<br>Volume: 1 to 3 cycles; alternance of 30s work/30s rest (30-60min)<br>Intensity: NR, but HR, SaO <sub>2</sub> (always>88%) and RPE (Borg scale 0-10) were monitored. | <u>Respiratory function:</u><br>SaO <sub>2</sub> pre- and post-functional tests (2-min step test and 30-s STST)                                                                                                                                                                                                                                                                                                                                                                                                                                                                                                                                                                                                                  |
| Sun et al., 2021 [66]     | Prospective<br>Single group | COV+:<br>n=31 (12f, 19m);<br>60.4±10.2 yo; NR<br>HT (n=12), DM (n=2), Hepatitis B (n=2), Cancer (n=2),                                                                                                                                                                                                                                                                                                                                        | <b>Moderate-to-High</b><br>Patients with respiratory rate≥30/min or SaO <sub>2</sub> ≤93% when they were breathing ambient air or PaO <sub>2</sub> /FiO <sub>2</sub> ≤300mmHg<br><br>Abnormalities on chest (CT): Bilateral | During the acute phase        | In hospital (by video teaching in the isolation ward)<br><br>Physical activity,                                                                                                                                                                                                          | Modality: resistance<br>Type: upper limbs (upward lift, lateral lift, abduction, chest enlargement, grasping), lower limb (lifting, kicking, tiptoeing, stepping, bridge exercise, air pedal, ankle pump). All                                                                                                                                                                                                                                                                                                                   | <i>Tests were performed at pre-RP, after 2 wk and after 3 wk of RP.</i><br><br><u>Functional capacity:</u><br>Exercise tolerance (capacity to elevate legs in bed, to stand and sit), Activities of daily living (capacity to wear clothes, to wear shoes, to go to the toilet by himself)                                                                                                                                                                                                                                                                                                                                                                                                                                       |



|                          |                                                                                |                                                                                                                                                                                                                                                                                                                                                                                                                                                                                                                                                           |                                                                                                                                                                                                                                                                                                                                                                                                                      |                                                                                                                                                                                                              |                                                                                                                                                |                                                                                                                                                                                                                                                                                                                                                                                                                                                                                                                                                                                                                                                                                                                  |                                                                                                                                                                                                                                                                                                                                                                                                                                                                |
|--------------------------|--------------------------------------------------------------------------------|-----------------------------------------------------------------------------------------------------------------------------------------------------------------------------------------------------------------------------------------------------------------------------------------------------------------------------------------------------------------------------------------------------------------------------------------------------------------------------------------------------------------------------------------------------------|----------------------------------------------------------------------------------------------------------------------------------------------------------------------------------------------------------------------------------------------------------------------------------------------------------------------------------------------------------------------------------------------------------------------|--------------------------------------------------------------------------------------------------------------------------------------------------------------------------------------------------------------|------------------------------------------------------------------------------------------------------------------------------------------------|------------------------------------------------------------------------------------------------------------------------------------------------------------------------------------------------------------------------------------------------------------------------------------------------------------------------------------------------------------------------------------------------------------------------------------------------------------------------------------------------------------------------------------------------------------------------------------------------------------------------------------------------------------------------------------------------------------------|----------------------------------------------------------------------------------------------------------------------------------------------------------------------------------------------------------------------------------------------------------------------------------------------------------------------------------------------------------------------------------------------------------------------------------------------------------------|
|                          |                                                                                | CKD (n=2), Coronary heart disease (n=2), Tuberculosis (n=1), Smoking history (n=0), No comorbidity (n=9)                                                                                                                                                                                                                                                                                                                                                                                                                                                  | patchy shadowing (n=21), Ground-glass opacity (n=16), Pulmonary bullae (n=1)                                                                                                                                                                                                                                                                                                                                         | respiratory exercises, psychotherapy                                                                                                                                                                         |                                                                                                                                                | exercises were performed in lying, sitting and standing positions<br>Frequency: 2x/day<br>Volume: for each movement, 5s x 2-3rep<br>Intensity: NR (but always SaO <sub>2</sub> >93%, HR<120bpm - if palpitation, sweating, shortness of breath: activity stopped)                                                                                                                                                                                                                                                                                                                                                                                                                                                | <u>Respiratory function:</u><br>Dyspnea (mMRC Dyspnea Scale), SaO <sub>2</sub> , Oxygen intake (probably from exogenous source), Need for oxygen therapy, Sputum, Cough and Shortness of breath (Questionnaires not further defined)                                                                                                                                                                                                                           |
|                          |                                                                                | Previous history of rehabilitation: n=7                                                                                                                                                                                                                                                                                                                                                                                                                                                                                                                   | COVID-19 symptoms at RP admission: Fever (n=23), Cough (n=22), Shortness of breath (n=12), Sputum production (n=4), Diarrhea (n=2), Fatigue (n=1)                                                                                                                                                                                                                                                                    | Duration: 3 wk                                                                                                                                                                                               |                                                                                                                                                | Patients who needed oxygen therapy could do it in bed or at bedside.                                                                                                                                                                                                                                                                                                                                                                                                                                                                                                                                                                                                                                             | <u>Quality of life, mental health, and general state:</u><br>Sleep quality (method NR), COVID-19 symptoms (method NR)                                                                                                                                                                                                                                                                                                                                          |
|                          |                                                                                |                                                                                                                                                                                                                                                                                                                                                                                                                                                                                                                                                           |                                                                                                                                                                                                                                                                                                                                                                                                                      |                                                                                                                                                                                                              |                                                                                                                                                |                                                                                                                                                                                                                                                                                                                                                                                                                                                                                                                                                                                                                                                                                                                  | <u>Biological parameters:</u><br>Lymphocytes, ALB, Total cholesterol, Neutrophils, CRP, Procalcitonin, WB, RBC, Hemoglobin, Triglycerids (methods NR)                                                                                                                                                                                                                                                                                                          |
|                          |                                                                                |                                                                                                                                                                                                                                                                                                                                                                                                                                                                                                                                                           |                                                                                                                                                                                                                                                                                                                                                                                                                      |                                                                                                                                                                                                              |                                                                                                                                                |                                                                                                                                                                                                                                                                                                                                                                                                                                                                                                                                                                                                                                                                                                                  | <u>Other:</u><br>Dietary habits (method NR)                                                                                                                                                                                                                                                                                                                                                                                                                    |
| Tozato et al., 2021 [67] | Prospective Case series                                                        | COV+: n=4 (2f, 2m); 56.0±12.1 yo; NR HT (n=3), Smoking history (n=1), HIV (n=1), Cancer (n=1), No comorbidity (n=1)                                                                                                                                                                                                                                                                                                                                                                                                                                       | <b>Moderate-to-High</b><br>Hospitalization (duration indicated for n=3): 29±28 days (calculated from raw data)<br>ICU (n=1): 9 days                                                                                                                                                                                                                                                                                  | Immediately after hospital discharge (n=3), 107 days after the symptoms start (n=1)<br><br>One subject had tetraparesis and started an adapted rehabilitation program during 45 days before to begin the RP. | In hospital<br><br>Physical activity in association with other therapies (NR).<br><br>Duration: 3 mo                                           | Modality: aerobic<br>Type: walking (treadmill), cycling (ergocycle), arm ergometer, stepping<br>Frequency: 3x/wk<br>Volume: 30min<br>Intensity: 60-80%HR <sub>reserve</sub> (estimated with Karvonen formula), RPE=4-6 (Borg scale 0-10), SaO <sub>2</sub> ≥90%<br><br>Modality: resistance<br>Type: all muscle groups<br>Frequency: 3x/wk<br>Volume: 3sets x 10rep for each exercise<br>Intensity: 60%1RM                                                                                                                                                                                                                                                                                                       | <u>Functional capacity:</u><br>6MWT, Handgrip, HR <sub>max</sub> during 6MWT, RPE <sub>max</sub> during 6MWT (Borg scale 0-10), Double product (HR x SBP) at rest, 1RM knee extension, 1RM shoulder abduction, 1RM elbow flexion<br><br><u>Respiratory function:</u><br>SaO <sub>2min</sub> during 6MWT                                                                                                                                                        |
| Udina et al., 2021 [68]  | Prospective Single group (but constitution of subgroups for specific analyses) | Total groups (COV+): n=33 (19f, 14m); 66.2±12.8 yo; NR<br>Comorbidities/patient: 1.5±1.6<br>Pre-COVID-19 well-functioning adults (low disability level, great independence level, low frailty status, low comorbidities)<br><br>ICU+ (COV+): n=20 (10f, 10m); 58.2±7.9 yo; NR<br>Comorbidities/patient: 0.5±0.8<br><br>ICU- (COV+): n=13 (9f, 4m); 78.4±8.1 yo; NR<br>Comorbidities/patient: 2.8±1.8<br><br>Subsample who performed 6MWT (ICU+ and ICU-): n=22 (14f, 8m); 61.9±12.1 yo; NR<br><br>Comparison groups between ICU+ and ICU-: age (p<0.001), | <b>Moderate-to-High</b><br>ICU (n=20 for Total groups; n=18 for subsample who performed 6MWT): 10.3±9.9 days<br>Mechanical ventilation (n=20, only ICU+)<br><br>Symptoms/complications due to COVID-19 at admission to RP: Pneumonia (Total groups: n=30; ICU+: n=20; ICU-: n=10; subsample who performed 6MWT: n=21)<br><br>Polypharmacy (≥5 drugs) at admission to RP (Total groups: n=24; ICU+: n=13; ICU-: n=11) | Immediately after post-acute care                                                                                                                                                                            | In hospital<br><br>Physical activity, respiratory exercises, manual therapy if necessary, anti-sedentary advices<br><br>Duration: 8.2±1.7 days | Modality: aerobic<br>Type: stepping, cycling (ergocycle), walking (continuous for all)<br>Frequency: NR<br>Volume: 5-15min<br>Intensity: RPE=3-5 (Borg scale 0-10)<br><br>Modality: resistance<br>Type: upper and lower limbs<br>Frequency: NR<br>Volume: 2-4 exercises, 1-2 sets x 8-10rep<br>Intensity: 30-80%1RM<br><br>Modality: balance<br>Type: static and dynamic (walking with obstacles, changing directions, unstable surfaces, unbalance, functional exercises)<br>Frequency: NR<br>Volume: 2 exercises<br>Intensity: N/A<br><br>+ recommendations to decrease daily sedentary behaviors<br><br><u>Total (for all modalities + breathing exercises):</u><br>Frequency: 1x/day, 7x/wk<br>Volume: 30min | <u>Functional capacity:</u><br>6MWT (evaluated only in a subsample for logistical reasons), SPPB (score 0-12 from 3 tests: static body balance, ability to walk and stand up from a chair), Ambulation capacity (FAC 4-5), Standing balance on a single leg (Single leg stance test - maintaining single leg stance for 10s)<br><br><u>Quality of life, mental health, and general state:</u><br>Disability level (BI), Delirium (Confusion assessment method) |

comorbidities  
(p<0.001)

|                                  |                             |                                                                                                                                                            |    |                                                                                                                                                                                                                                                                                                                                                                                                            |                                                                                                                                                                                                                                                                                               |                                                                                                                                                                                                                                                                                                                                                 |                                                                                                                                                                                                                                  |
|----------------------------------|-----------------------------|------------------------------------------------------------------------------------------------------------------------------------------------------------|----|------------------------------------------------------------------------------------------------------------------------------------------------------------------------------------------------------------------------------------------------------------------------------------------------------------------------------------------------------------------------------------------------------------|-----------------------------------------------------------------------------------------------------------------------------------------------------------------------------------------------------------------------------------------------------------------------------------------------|-------------------------------------------------------------------------------------------------------------------------------------------------------------------------------------------------------------------------------------------------------------------------------------------------------------------------------------------------|----------------------------------------------------------------------------------------------------------------------------------------------------------------------------------------------------------------------------------|
| Zampogna<br>et al., 2021<br>[69] | Prospective<br>Single group | COV+:<br>n=140 (45f, 90m);<br>median: 71.0 [IQR:<br>61.5, 78.0] yo;<br>median: 25.2 [IQR:<br>23.2, 29.3] kg/m <sup>2</sup><br>COPD (n=23),<br>Asthma (n=6) | NR | <b>Moderate-to-High</b><br>'Patients transferred from ICU, sub-<br>ICU, pneumology units, or general<br>wards'<br>Hospitalization: median: 47 [IQR: 33.5,<br>64] days<br>Respiratory status during<br>hospitalization: Invasive ventilation<br>(n=56), Non-invasive ventilation<br>(n=70), Need for oxygen therapy<br>(n=117)<br><br>Respiratory status at RP admission:<br>Need for oxygen therapy (n=33) | In hospital (inpatient)<br><br>Physical activity, drug<br>therapy, and in function of<br>patients' need, chest<br>physiotherapy, lung<br>expansion procedures,<br>nutritional and<br>psychological therapy<br><br>Duration: median: 24<br>[IQR: 19, 34] days (total<br>sessions - median: 60) | <u>Level A (SPPB&lt;6):</u><br>Modality: aerobic<br>Type: free walking<br>Frequency: NR<br>Volume: NR<br>Intensity: NR<br><br>Modality: resistance<br>Type: peripheral limbs, shoulders, full<br>arm circling<br>Frequency: NR<br>Volume: NR<br>Intensity: NR                                                                                   | <u>Functional capacity:</u><br>6MWT, SPPB (score 0-12 from 3 tests: static body balance, ability to walk and<br>stand up from a chair)<br><br><u>Quality of life, mental health, and general state:</u><br>Disability level (BI) |
|                                  |                             |                                                                                                                                                            |    |                                                                                                                                                                                                                                                                                                                                                                                                            |                                                                                                                                                                                                                                                                                               | <u>Level B (SPPB&gt;6):</u><br>Modality: aerobic<br>Type: paced walking, cycling<br>(ergocycle, for patients with higher<br>physical autonomy)<br>Frequency: NR<br>Volume: NR<br>Intensity: for cycling, low intensity<br>(<3 METs), RPE=4-5 (Borg scale 0-<br>10)                                                                              |                                                                                                                                                                                                                                  |
|                                  |                             |                                                                                                                                                            |    |                                                                                                                                                                                                                                                                                                                                                                                                            |                                                                                                                                                                                                                                                                                               | Modality: resistance<br>Type: gymnastics, strengthening<br>Frequency: NR<br>Volume: NR<br>Intensity: NR                                                                                                                                                                                                                                         |                                                                                                                                                                                                                                  |
|                                  |                             |                                                                                                                                                            |    |                                                                                                                                                                                                                                                                                                                                                                                                            |                                                                                                                                                                                                                                                                                               | Modality: balance<br>Type: NR<br>Frequency: NR<br>Volume: NR<br>Intensity: NR                                                                                                                                                                                                                                                                   |                                                                                                                                                                                                                                  |
|                                  |                             |                                                                                                                                                            |    |                                                                                                                                                                                                                                                                                                                                                                                                            |                                                                                                                                                                                                                                                                                               | <u>Total (for all modalities):</u><br>Type: without devices or used of<br>gymnastic tools such as balls, canes,<br>balance boards, or light weights bands<br>Frequency: 1-3x/day<br>Volume: 20-30min<br>Intensity: NR [Evolution: subjects<br>were assessed daily to adjust the type,<br>intensity, timing and modality of the<br>intervention] |                                                                                                                                                                                                                                  |

10MWT: 10-minute walk test, 6MWT: 6-minute walk test, ALB: albumin, AMPAC: activity measure for post-acute care 6 clicks, ASM: appendicular skeletal muscle mass, BI: Barthel index, BMI: body mass index, BNP: brain natriuretic peptide, bpm: beats per minute, CIRS: cumulative illness rating scale, CKD: chronic kidney disease, CO<sub>2</sub>: carbon dioxide, CON: controlled group (COVID-19 subjects who didn't performed rehabilitation program), COPD: chronic obstructive pulmonary disease, COV+: COVID-19 subjects who performed rehabilitation program, COV-: subjects without COVID-19 infection who performed rehabilitation program, CPET: cardiopulmonary exercise test, CRP: C-reactive protein, CT: computed tomography, CVD: cardiovascular disease, DLCO: diffusing capacity for carbon monoxide, DM: diabetes mellitus, DBP: diastolic blood pressure, EI: independent exercise group, EQ5D: EuroQol questionnaire - 5 dimensions, ESWT: endurance shuttle walking test, f: female subjects, FAC: Functional ambulatory category, FEV1: forced expiratory volume in 1 second, FFM: fat-free mass, Fi: fraction of inspired gas, FIM: functional independence measure, FM: fat mass, FVC: forced vital capacity, GAD-7: generalized anxiety disorder-7 questionnaire, HADS: hospital anxiety and depression scale, HR: heart rate, HIIT: high intensity interval training, HPT: home in-person physical therapy group, HT: hypertension, ICU: intensive care unit, IL: interleukine, Ig: immunoglobulin, IQR: interquartile range, IT: interval training, KCO: carbon monoxide transfer coefficient, LDH: lactate dehydrogenase, m: male subjects, MICT: moderate interval continuous training, min: minute, mMRC: modified Medical Research Council, mo: month, MoCA: Montreal cognitive assessment, MRC: Medical Research Council, N/A: not applicable, NR: not reported, NRS: numerical rating scale, O<sub>2</sub>: oxygen, Pa: partial pressure of a gas, PEF: peak expiratory flow, PE<sub>max</sub>: maximal expiratory pressure, PHQ-9: patient health questionnaire 9, PI<sub>max</sub>: maximal inspiratory pressure, P<sub>max</sub>: maximal puissance, PSQI: Pittsburgh sleep quality index, QoL: quality of life, RBC: red blood cells, rep: repetitions, RM: repetition maxima, ROS: reactive oxygen species, RP: rehabilitation program, RPE: rating of perceived exertion, RV: residual

volume, s: second, SaO<sub>2</sub>: oxygen saturation, SARS-CoV-2: severe acute respiratory syndrome coronavirus 2, SBP: systolic blood pressure, SF-36: short form 36 health survey questionnaire, SPPB: short physical performance battery, STST: sit-to-stand test, TLC: total lung capacity, TNF- $\alpha$ : Tumor Necrosis Factor-alpha, VAS: visual analog scale, VC: vital capacity, VPT: virtual physical therapy group, WR: work rate, yo: year old. #: unclear. Severity of COVID-19: Low: no-hospitalized patients, Moderate: hospitalized patients but not in intensive care, High: hospitalized patients in intensive care.

**Supplementary Table S3:** Effects of the rehabilitation program on function capacity, respiratory function, and quality of life in post-COVID-19 patients.

| Reference                       | Effects of the RP on functional capacity                                                                                                                                                                                                                                                                                                                                                                                                                                                                   | Effects of the RP on respiratory function                                                                                                                                                                                                                             | Effects of the RP on quality of life, mental health, and general state                                                                                                                                                                                                                               | Effects of the RP on Biological and other parameters and adherence and tolerability of the RP                                                                                                                                                                                                         |
|---------------------------------|------------------------------------------------------------------------------------------------------------------------------------------------------------------------------------------------------------------------------------------------------------------------------------------------------------------------------------------------------------------------------------------------------------------------------------------------------------------------------------------------------------|-----------------------------------------------------------------------------------------------------------------------------------------------------------------------------------------------------------------------------------------------------------------------|------------------------------------------------------------------------------------------------------------------------------------------------------------------------------------------------------------------------------------------------------------------------------------------------------|-------------------------------------------------------------------------------------------------------------------------------------------------------------------------------------------------------------------------------------------------------------------------------------------------------|
| Al Chikhanie et al., 2021 [35]  | <b>6MWT (m):</b><br>- COV+: 139±144 / 343±140*<br>- COV-: 137±152 / 223±171*<br>Groups comparison: COV+ > COV- in post-RP<br><b>Handgrip (kg):</b><br>- COV+: 18.1±8.0 / 23.5±8.5*<br>- COV-: NR<br><b>Quadriceps isometric (kg):</b><br>- COV+: 14.2±10.6 / 25.5±11.7*<br>- COV-: NR<br><b>Tinetti test (score):</b><br>- COV+: 25.0±3.0 / 27.5±1.0<br>- COV-: NR<br>Correlation between 6MWT improvement (m/days) with the number of days post-ICU (p=0.01), and with the number of days in RP (p=0.09). | <b>SaO<sub>2</sub>min during 6MWT and Dyspnea post-6MWT:</b><br>- COV+: →<br>- COV-: →<br><b>FEV1, FVC, PI<sub>max</sub>, PE<sub>max</sub>:</b><br>- COV+: ↗<br>- COV-: NR<br><b>Need for oxygen therapy (% of sample):</b><br>- COV+: 86 / 16%#<br>- COV-: 76 / 62%# | <i>Results only for COV+</i><br><b>QoL, Post-traumatic stress:</b> →<br><b>Anxiety and depression, Fatigue:</b> ↘                                                                                                                                                                                    | <u>Adherence and tolerability:</u><br><b>Adherence:</b> 100%                                                                                                                                                                                                                                          |
| Bernal-Utrera et al., 2021 [36] | NR, but stated that patients felt daily improvement.                                                                                                                                                                                                                                                                                                                                                                                                                                                       | NR, but stated that patients felt daily improvement.                                                                                                                                                                                                                  | NR, but stated that patients felt significant improvements on physical symptomatology (fatigue, weakness, myalgia) and psychological benefits (more confidence, safeguarding, well-being, motivation, distraction from confinement and disease, emotional support from physical therapist' presence) | <u>Adherence and tolerability:</u><br>No apparent dropout. Great acceptability that 'could be related to the fact that patients felt that they took part in their recovery'                                                                                                                           |
| Bertolucci et al., 2021 [37]    | <b>Peripheral nervous system impairment evaluated by electromyography (% of sample):</b> 18 / 18%#                                                                                                                                                                                                                                                                                                                                                                                                         | <b>Need for tracheostomy (% of sample):</b> 28 / 4%#<br><b>Need for oxygen therapy (% of sample):</b> 79 / 21%#<br><b>PaO<sub>2</sub>/FiO<sub>2</sub> ratio:</b> 361±123 / NR                                                                                         | <b>Mental confusion (% of sample):</b> 18 / 0%#<br><b>Disability level:</b> ↘<br><b>Ambulation capacity:</b> ↗                                                                                                                                                                                       | <u>Drugs:</u><br><b>Corticosteroids intake (% of sample):</b> 49 / 10%#<br><b>Antipsychotic intake (% of sample):</b> 28 / 13%#<br><br><u>Other:</u><br><b>Dysphagia (% of sample):</b> 18 / 0%#<br><b>Rectal colonization:</b> →<br><br><u>Adherence and tolerability:</u><br><b>Adherence:</b> 100% |
| Betschart et al., 2021 [38]     | <b>6MWT (m):</b> 442 / 554***<br><b>Δ6MWT (m):</b> +88 (range: 80-170)<br>For n=9/12: clinically significant ↗ 6MWT (>30m)                                                                                                                                                                                                                                                                                                                                                                                 | N/A                                                                                                                                                                                                                                                                   | <b>QoL:</b> ↗<br><b>Perception of COVID-19 specific limitations in daily life (n in sample):</b> 10 / 4# (negligible or slight limitations)                                                                                                                                                          | <u>Adherence and tolerability:</u><br>Dropout rate of 25% and 2 patients who stopped because they perceived their performance level and QoL have reached the level it was before the infection                                                                                                        |
| Büsching et al., 2021 [39]      | <b>6MWT (m):</b><br>- COV+: 336±169 (n=41) / 484±147**** (n=45)<br>- COV-: 320±136 (n=48) / 417±145**** (n=50)<br>Groups comparison: COV+ > COV- in post-RP<br><b>Δ6MWT (m):</b><br>- COV+: +133±93 (n=40)<br>- COV-: +102±73 (n=47)<br>Groups comparison: COV+ > COV- (trend), COV+ ICU+ = COV+ ICU-                                                                                                                                                                                                      | N/A                                                                                                                                                                                                                                                                   | <b>Disability level:</b><br>- COV+: ↘ (n=21)<br>- COV-: ↘<br>Groups comparison:<br>- pre-RP: COV+ (n=25) < COV-<br>- post-RP: COV+ (n=36) = COV-<br>- Δ: COV+ = COV-, COV+ ICU- = COV+ ICU-<br><b>Disability level:</b><br>- COV+: ↘ (n=45)<br>- COV-: ↘                                             | <u>Adherence and tolerability:</u> no information                                                                                                                                                                                                                                                     |

|                             |                                                                                                                                                                                                                                                                                                                                                                                                                                                                                                                                                                                                                                                                                                                                                                                                                                                    |                                                                                                                                                                                                                                                                                                                                                                                                                                                                                                                                                                                                                                              |                                                                                                                                                                                                                                                                                                                                                                                                                                                                                    |                                                                                                                                                                                                                                                                                                   |
|-----------------------------|----------------------------------------------------------------------------------------------------------------------------------------------------------------------------------------------------------------------------------------------------------------------------------------------------------------------------------------------------------------------------------------------------------------------------------------------------------------------------------------------------------------------------------------------------------------------------------------------------------------------------------------------------------------------------------------------------------------------------------------------------------------------------------------------------------------------------------------------------|----------------------------------------------------------------------------------------------------------------------------------------------------------------------------------------------------------------------------------------------------------------------------------------------------------------------------------------------------------------------------------------------------------------------------------------------------------------------------------------------------------------------------------------------------------------------------------------------------------------------------------------------|------------------------------------------------------------------------------------------------------------------------------------------------------------------------------------------------------------------------------------------------------------------------------------------------------------------------------------------------------------------------------------------------------------------------------------------------------------------------------------|---------------------------------------------------------------------------------------------------------------------------------------------------------------------------------------------------------------------------------------------------------------------------------------------------|
|                             |                                                                                                                                                                                                                                                                                                                                                                                                                                                                                                                                                                                                                                                                                                                                                                                                                                                    |                                                                                                                                                                                                                                                                                                                                                                                                                                                                                                                                                                                                                                              | Groups comparison:<br>- pre-RP: COV+ (n=45) < COV-<br>- post-RP: COV+ (n=45) < COV-<br>- Δ: COV+ = COV-, COV+ ICU- = COV+ ICU-                                                                                                                                                                                                                                                                                                                                                     |                                                                                                                                                                                                                                                                                                   |
| Curci et al., 2021 [40]     | <b>6MWT (m):</b> 240±81 (n=6) / 303±112* (n=37)<br><b>Proportion 6MWT&lt;200m in patients able to perform (% of sample):</b> 50 / 23% <sup>#</sup><br><b>RPE (probably post-6MWT) (Borg scale):</b> 16.0±2.3 / 12.2±2.5****                                                                                                                                                                                                                                                                                                                                                                                                                                                                                                                                                                                                                        | <b>Dyspnea in activity of daily life:</b> ∟<br><b>Need for respiratory supports:</b> ∟ (all discharged patients needed no respiratory support)<br><b>FiO<sub>2</sub>:</b> ∟<br><b>PaO<sub>2</sub>/FiO<sub>2</sub>:</b> ↗<br><b>PaO<sub>2</sub>:</b> ↗ <sup>ε</sup><br><b>SaO<sub>2</sub>:</b> ↗ <sup>ε</sup><br><b>CT scan:</b> 74% showed a reduced ground glass opacity, 26% showed unchanged extension, 8% fully recovered                                                                                                                                                                                                                | <b>Disability level:</b> ∟<br><b>Ambulation capacity:</b> ↗ (recovered in 100% patients)                                                                                                                                                                                                                                                                                                                                                                                           | <u>Biological parameters:</u><br><b>Arterial lactate, CRP, D-dimer, LDH:</b> ∟<br><br><u>Adherence and tolerability:</u><br>No dropout (but deaths of 2 patients)                                                                                                                                 |
| Daynes et al., 2021 [41]    | <b>Incremental shuttle walking test (m):</b> 300±198 / 413±229**<br><b>ESWT (s):</b> 292±260 / 837±406**                                                                                                                                                                                                                                                                                                                                                                                                                                                                                                                                                                                                                                                                                                                                           | <b>Respiratory symptoms:</b> ∟                                                                                                                                                                                                                                                                                                                                                                                                                                                                                                                                                                                                               | <b>Fatigue:</b> ∟ (↗ for n=4)<br><b>Anxiety and depression:</b> →<br><b>QoL, Cognition:</b> ↗                                                                                                                                                                                                                                                                                                                                                                                      | <u>Adherence and tolerability:</u><br><b>Adherence:</b> 94% (initially 32 subjects)<br>11/12 sessions completed in average                                                                                                                                                                        |
| Dun et al., 2021 [42]       | <b>6MWT (m):</b><br>- COV+: 366±59 / NR <sup>#</sup><br>- CON: 538±68 / NR <sup>#</sup><br><b>Δ6MWT (m):</b><br>- COV+: +254±67<br>- Low-volume (≤17 RP sessions, n=14): +204<br>- High-volume (>17 RP sessions, n=13): +263<br>- CON: +60±58<br>Groups comparison: CON < COV+, Low-volume < High-volume                                                                                                                                                                                                                                                                                                                                                                                                                                                                                                                                           | N/A                                                                                                                                                                                                                                                                                                                                                                                                                                                                                                                                                                                                                                          | N/A                                                                                                                                                                                                                                                                                                                                                                                                                                                                                | <u>Biological parameters:</u><br>COV+ = CON for all parameters changes (# for pre vs post-RP measures)<br><br><u>Adherence and tolerability:</u><br>Number of completed sessions: median: 17 (range: 5-30)                                                                                        |
| Everaerts et al., 2021 [43] | <i>All results expressed in median [IQR]</i><br><i>Pre-RP / 6 wk of RP / 12 wk of RP (post-RP)</i><br><b>6MWT (m):</b> 453 [342-529] / 549 [478-620]****μ / 605 [497-655]****μ<br><b>6MWT (%pred):</b> 63 [53-73] / 77 [73-85]****μ / 88 [76-91]****μ<br><b>Δ6MWT (m):</b> N/A / +86 [53-175] / +149 [90-221]<br><b>Handgrip (%pred):</b> 69 [61-81] / 90 [78-103]****μ / 104 [96-112]****μ<br>Groups comparison ICU+ vs ICU-: improvements appeared more pronounced in ICU+ for 6MWT and Handgrip.<br><i>Pre-RP / Post-RP</i><br><b>CPET work load (%pred):</b> 65 [50-78] / 96 [83-114]****μ<br><b>VO<sub>2peak</sub> estimated from CPET (ml/min/kg):</b> 16 [13-20] / 20 [16-30]****μ<br><b>VO<sub>2peak</sub> estimated from CPET (%pred):</b> 66 [56-73] / 91 [82-108]****μ<br><b>Quadriceps force (%pred):</b> 61 [50-70] / 74 [71-87]****μ | <b>FVC, FEV1, TLC, DLCO, P<sub>I</sub>max, P<sub>E</sub>max (all in %pred):</b> ↗                                                                                                                                                                                                                                                                                                                                                                                                                                                                                                                                                            | <b>Anxiety and depression, Cognition:</b> → <sup>μ</sup><br><b>Cognitive deficits:</b> ∟ <sup>μ</sup>                                                                                                                                                                                                                                                                                                                                                                              | <u>Adherence and tolerability:</u><br><b>Dropouts at 6 wk:</b> n=1<br><b>Dropouts at 12 wk:</b> n=6/22 (satisfying results n=2, poor motivation n=1, interfering medical problems - myasthenia gravis, lumbar discus hernia, severe cognitive dysfunction n=3)                                    |
| Ferraro et al., 2021 [44]   | <i>Results were analysed (T tests) from raw data.</i><br><b>6MWT (m):</b> 173±73 / 313±26**<br><b>Handgrip (kg):</b> 21±9 / 28±8*<br><b>10MWT (s):</b> 11±5 / 8±3*<br><b>SPPB (score 0-12):</b> 6±5 / 11±2*                                                                                                                                                                                                                                                                                                                                                                                                                                                                                                                                                                                                                                        | N/A                                                                                                                                                                                                                                                                                                                                                                                                                                                                                                                                                                                                                                          | <i>Results were analysed (T tests) from raw data.</i><br><b>Fatigue, Disability level:</b> ∟                                                                                                                                                                                                                                                                                                                                                                                       | <u>Adherence and tolerability:</u><br>No information but one patient excluded for missing data.                                                                                                                                                                                                   |
| Gloeckl et al., 2021 [45]   | <i>All results expressed in median [IQR]</i><br><b>6MWT (m):</b><br>- M.COV+: 509 [426, 539] / 557 [463, 633]*** (Δ +48 [35, 113])<br>- S.COV+: 344 [244, 392] / 468 [374, 518]*** (Δ +124 [75, 145])<br>Groups comparison: M.COV+ > S.COV+ in pre-RP, M.COV+ < S.COV+ for Δ<br><b>6MWT (%pred):</b><br>- M.COV+: 70 [58, 80] / 81 [68, 91]*** (Δ +11 [5, 15])<br>- S.COV+: 53 [42, 58] / 71 [60, 83]*** (Δ +18 [11, 23])<br>Groups comparison: M.COV+ < S.COV+ for Δ<br><br><i>Only S.COV+:</i><br><b>ESWT (m):</b> 430 [195, 758] / 980 [390, 1385]*** (Δ +550 [50, 725])<br><b>ESWT (s):</b> 460 [217, 625] / 1200 [312, 1200]**** (Δ +740 [143, 789])<br><b>HR pre-ESWT (bpm):</b> 86 [77, 98] / 85 [75, 95] (Δ -1 [-8, 4])<br><b>HR post-ESWT (bpm):</b> 114 [99, 126] / 108 [97, 119] (Δ -6 [-12, 5])                                        | <i>All results expressed in median [IQR]</i><br><b>Dyspnea post-6MWT (Borg scale):</b> → (for the two groups, NS for groups comparison)<br><b>PaO<sub>2</sub>, FVC (%pred), FEV1 (%pred):</b> ↗<br>Groups comparison: M.COV+ > S.COV+ for FEV1 at pre-RP, M.COV+ = S.COV+ for all Δ<br><b>TLC (%pred), KCO (%pred), PaCO<sub>2</sub>:</b> → (NS for groups comparison)<br><b>DLCO (%pred):</b><br>- M.COV+: →<br>- S.COV+: ↗<br>Groups comparison: M.COV+ = S.COV+ for Δ<br><b>Need for oxygen therapy at rest:</b><br>- M.COV+: →<br>- S.COV+: ∟<br>Groups comparison: M.COV+ = S.COV+ for Δ<br><b>Need for oxygen therapy at exertion:</b> | <b>SF-36 physical component (score):</b> → (NS for groups comparison)<br><b>SF-36 mental component (score):</b><br>- M.COV+: →<br>- S.COV+: ↗<br>Groups comparison: M.COV+ < S.COV+ for Δ<br><br><i>Only S.COV+:</i><br><b>Depression, Anxiety:</b> ∟<br><b>Cognition:</b> ↗<br><b>COVID-19 symptoms (% of sample):</b><br>- Dyspnea: 85 / 73% <sup>#</sup><br>- Fatigue: 73 / 58% <sup>#</sup><br>- Cough: 54 / 35% <sup>#</sup><br>- Cognitive impairment: 14 / 14% <sup>#</sup> | <u>Biological parameters:</u><br><b>CRP, Leukocytes, Pro-BNP:</b> → (NS for groups comparison)<br><b>D-dimer:</b><br>- M.COV+: →<br>- S.COV+: ↗<br>Groups comparison: M.COV+ < S.COV+ for Δ<br><br><u>Adherence and tolerability:</u><br>Patients realized 94 to 100% of rehabilitation sessions. |

|                          |     |                                                                                                                                                                                                                                                                                                                                                                                                                                                                                                       |                                                                                                                                                                                                                                                                                                                                                                                                                                                                                                                                                                                                                               |                                                                                                                                                                                                                                                                                                                                                                                                                                                                                         |                                                                                                                                                                                                                                                                                                                                                                                                                                                                                                                                                                               |
|--------------------------|-----|-------------------------------------------------------------------------------------------------------------------------------------------------------------------------------------------------------------------------------------------------------------------------------------------------------------------------------------------------------------------------------------------------------------------------------------------------------------------------------------------------------|-------------------------------------------------------------------------------------------------------------------------------------------------------------------------------------------------------------------------------------------------------------------------------------------------------------------------------------------------------------------------------------------------------------------------------------------------------------------------------------------------------------------------------------------------------------------------------------------------------------------------------|-----------------------------------------------------------------------------------------------------------------------------------------------------------------------------------------------------------------------------------------------------------------------------------------------------------------------------------------------------------------------------------------------------------------------------------------------------------------------------------------|-------------------------------------------------------------------------------------------------------------------------------------------------------------------------------------------------------------------------------------------------------------------------------------------------------------------------------------------------------------------------------------------------------------------------------------------------------------------------------------------------------------------------------------------------------------------------------|
|                          |     | <b>Handgrip (kg):</b> 25 [18, 35] / 30 [20, 39]** (Δ +5 [3, 7])<br><b>Maximal quadriceps strength (%pred):</b> 78 [49, 98] / 100 [68, 103]** (Δ +21 [6, 31])<br><b>5-rep STST (s):</b> 13.3 [10.5, 15.5] / 10.3 [8.5, 13.2]*** (Δ -3.0 [-4.3, 0.3])                                                                                                                                                                                                                                                   | - M.COV+: →<br>- S.COV+: ↘<br>Groups comparison: M.COV+ = S.COV+ for Δ                                                                                                                                                                                                                                                                                                                                                                                                                                                                                                                                                        |                                                                                                                                                                                                                                                                                                                                                                                                                                                                                         |                                                                                                                                                                                                                                                                                                                                                                                                                                                                                                                                                                               |
|                          |     |                                                                                                                                                                                                                                                                                                                                                                                                                                                                                                       | <i>Only S.COV+:</i><br><b>Breathing frequency pre- and post-ESWT, Dyspnea during daily activities:</b> ↘<br><b>SaO<sub>2</sub> pre-ESWT (%):</b> ↗<br><b>SaO<sub>2</sub> post-ESWT (%):</b> ↗ <sup>E</sup>                                                                                                                                                                                                                                                                                                                                                                                                                    |                                                                                                                                                                                                                                                                                                                                                                                                                                                                                         |                                                                                                                                                                                                                                                                                                                                                                                                                                                                                                                                                                               |
| Gobbi et al., 2021 [46]  |     | <b>Handgrip (kg):</b><br>- Total S.COV+: 17.3±5.6 / 20.6± 7.2** (Δ +19.71%)<br>- m S.COV+: 19.9±6.1 / 23.9±6.9 <sup>E</sup> (Δ +6.04%)<br>- f S.COV+: 13.8±2.9 / 16.1±2.3* (Δ +16.67%)<br>- Tot NS.COV+: 25.7±8.2 / 26.7±8.3 (Δ +3.89%)<br>- m NS.COV+: 31.2±10.8 / 33.5±7.2 (Δ +7.32%)<br>- f NS.COV+: 22.4±5.1 / 22.2±5.4 (Δ -0.89%)<br><b>Time-up-to-go test (s):</b><br>- S.COV+: 31.5±23.5 / 17.9±15.9* (Δ -26.83%)<br>- NS.COV+: 13.1±8.1 / 9.0±3.3* (Δ -31.29%)<br><br># for groups comparison | <b>SaO<sub>2</sub> in lying position:</b> → (for the two groups)<br><b>SaO<sub>2</sub> in sitting position:</b> ↗ (but trend for NS.COV+)<br><b>SaO<sub>2</sub> in standing position:</b><br>- S.COV+: ↗<br>- NS.COV+: →<br><b>SaO<sub>2</sub> post-Time-up-and-go test:</b><br>- S.COV+: ↗ <sup>E</sup><br>- NS.COV+: →<br><b>Dyspnea in lying position:</b> ↘ (for the two groups)<br><b>Dyspnea in sitting position:</b><br>- S.COV+: →<br>- NS.COV+: ↘<br><b>Dyspnea in standing position:</b> ↘ (for the two groups)<br><b>Dyspnea post-Time-up-and-go test:</b> ↘ (but trend for S.COV+)<br><br># for groups comparison | N/A                                                                                                                                                                                                                                                                                                                                                                                                                                                                                     | <u>Biological parameters:</u><br><b>ALB:</b> → (for the two groups)<br>Groups comparison: S.COV+ < NS.COV+ in pre-RP<br><b>Ferritin:</b><br>- S.COV+: ↘<br>- NS.COV+: →<br>Groups comparison: S.COV+ > NS.COV+ in pre-RP<br><b>Vitamin D:</b><br>- S.COV+: ↗<br>- NS.COV+: →<br>Groups comparison: S.COV+ < NS.COV+ in pre-RP<br><br><u>Other:</u><br><b>BMI:</b> → (for the two groups)<br><b>Phase angle:</b><br>- S.COV+: →<br>- NS.COV+: ↗<br><b>ASM:</b> ↗ (for the two groups)<br>- m: → (for the two groups)<br>- f: ↗ (for the two groups)<br># for groups comparison |
| Güler et al., 2021 [47]  | N/A |                                                                                                                                                                                                                                                                                                                                                                                                                                                                                                       | <b>Need for oxygen therapy (% of sample):</b> 84 / 8% <sup>#</sup>                                                                                                                                                                                                                                                                                                                                                                                                                                                                                                                                                            | <b>Disability level:</b> ↘<br><b>Functional status (% of sample):</b><br>- Bedridden: 55 / 2% <sup>#</sup><br>- Wheelchair: 22 / 5% <sup>#</sup><br>- Mobilized with oxygen requirement: 20 / 8% <sup>#</sup><br>- Mobilized with assistive device: 2 / 22% <sup>#</sup><br>- Mobilized with no requirement: 0 / 62% <sup>#</sup>                                                                                                                                                       | <u>Adherence and tolerability:</u> no information<br><br><u>Adherence and tolerability:</u> no information                                                                                                                                                                                                                                                                                                                                                                                                                                                                    |
| Hameed et al., 2021 [48] |     | <b>2-min step test (unit NR):</b><br>- VPT: 44±23 / 73±26***<br>- HPT: 46±27 / 71±30*<br>- IE: 54±24 / 76±14*<br>- CON: 59±30 / 69±12<br><b>30-s STST (unit NR):</b><br>- VPT: 9±4 / 13±3***<br>- HPT: 8±3 / 12±1**<br>- IE: 10±5 / 13±3 <sup>E</sup><br>- CON: 12±4 / 11±7<br><br># for groups comparison                                                                                                                                                                                            | <b>SaO<sub>2</sub> (probably at rest) (%):</b><br>- Total groups: 96±3 (n=80) / 98±1% (n=33) <sup>#</sup><br>- ‘Follow-up population’ <sup>#</sup> : ↗<br>Groups comparison: NS in pre- and post-RP                                                                                                                                                                                                                                                                                                                                                                                                                           | N/A                                                                                                                                                                                                                                                                                                                                                                                                                                                                                     | <u>Other:</u><br><b>Participants working (% of sample):</b><br>- VPT: 2 / 14% <sup>#</sup><br>- HPT: 0 / 20% <sup>#</sup><br>- IE: 6 / 0% <sup>#</sup><br>- CON: 0 / 0% <sup>#</sup><br><br><u>Adherence and tolerability:</u><br>50% of participants were lost for the follow-up visit.                                                                                                                                                                                                                                                                                      |
| Hayden et al., 2021 [49] |     | <b>6MWT (m):</b><br>- Total groups (n=97): 419±127 (range: 13-663) / 530±100 (range: 175-740) (ES: large)<br>- Group A (n=52): 377±142 (range: 13-603) / 508±111 (range: 175-720) (ES: large)<br>- Group B (n=27): 459±79 (range: 270-590) / 555±80 (range: 406-675) (ES: large)<br>- Group C (n=18): 480±97 (range: 275-663) / 554±86 (range: 380-740) (ES: large)                                                                                                                                   | <b>ΔDyspnea at rest (NRS):</b><br>- Total groups (n=82): -0.7 [95%CI: -1.0, -0.3] (ES: small)<br>- Group A (n=43): -0.6 [95%CI: -1.1, -0.2] (ES: small)<br>- Group B (n=24): -0.6 [95%CI: -1.2, -0.0] (ES: small)<br>- Group C (n=15): -0.9 [95%CI: -2.2, -0.4] (ES: small)<br>Time (p<0.001), Group NS, Group x Time NS<br><b>ΔDyspnea at exertion (NRS):</b><br>- Total groups (n=82): -2.2 [95%CI: -2.7, -1.6] (ES: large)<br>- Group A (n=43): -2.4 [95%CI: -3.2, -1.6] (ES: large)                                                                                                                                       | <b>Δ"How intense is your cough?" (NRS):</b><br>- Total group (n=82): -0.9 [95%CI: -1.3, -0.4] (ES: small)<br>- Group A (n=43): -1.1 [95%CI: -1.7, -0.6] (ES: moderate)<br>- Group B (n=25): -0.3 [95%CI: -0.6, 0.2] (ES: very small)<br>- Group C (n=): -1.1 [95%CI: -3.0, 0.7] (ES: small)<br>Time (p<0.001), Group (p<0.05), Group x Time NS<br><b>Δ"How big is the amount of phlegm that you expectorate?" (NRS):</b><br>- Total groups (n=81): -0.5 [95%CI: -0.8, -0.2] (ES: small) | <u>Biological parameters:</u><br><b>ΔLDH (U/I):</b><br>- Total groups (n=56): -4.1 [95%CI: -11.9, 3.8] (ES: very small)<br>- Group A (n=30): -4.1 [95%CI: -16.9, 8.7] (ES: very small)<br>- Group B (n=17): -5.0 [95%CI: -17.2, 7.2] (ES: small)<br>- Group C (n=9): -2.1 [95%CI: -18.5, 14.2]                                                                                                                                                                                                                                                                                |

Time (p<0.001), Group (p<0.01), Group x Time (p<0.05)

**Δ6MWT (m):**

- Total groups: 111 [95%CI: 94, 127]

- Group A: 131 [95%CI: 107, 155]

- Group B: 96 [95%CI: 72, 120]

- Group C: 74 [95%CI: 33, 114]

Groups comparison: Groups A and B > C; Patients who were the more severely burdened at pre-RP achieved the higher improvement.

**Correlation with Δ6MWT:**

- Positive correlation with ΔPaO<sub>2</sub> (p<0.01), ΔCRP (p<0.05), ΔEQ5D (p<0.05), ΔEQ5D VAS (p<0.05)

- Negative correlation with ΔPI<sub>max</sub> (p<0.01)

- Group B (n=24): -2.2 [95%CI: -3.4, -1.0] (ES: large)

- Group C (n=15): -1.5 [95%CI: -2.9, -0.1] (ES: moderate)

Time (p<0.001), Group NS, Group x Time NS

**Δ"How burdening or debilitating is your dyspnea at rest?" (NRS):**

- Total groups (n=81): -1.1 [95%CI: -1.4, -0.7] (ES: moderate)

- Group A (n=43): -1.0 [95%CI: -1.5, -0.5] (ES: moderate)

- Group B (n=23): -1.4 [95%CI: -2.2, -0.5] (ES: moderate)

- Group C (n=15): -0.7 [95%CI: -1.6, 0.1] (ES: small)

Time (p<0.001), Group (p<0.05), Time x Group NS

**Δ"How burdening or debilitating is your dyspnea on exertion?" (NRS):**

- Total groups (n=81): -2.1 [95%CI: -2.7, -1.5] (ES: moderate)

- Group A (n=43): -2.4 [95%CI: -3.2, -1.6] (ES: large)

- Group B (n=23): -2.4 [95%CI: -3.6, -1.2] (ES: large)

- Group C (n=15): -0.9 [95%CI: -2.1, 0.4] (ES: small)

Time (p<0.001), Group NS, Group x Time NS

**ΔNSAVC (%pred):**

- Total groups (n=103): 8.3 [95%CI: 4.9, 11.8] (ES: small)

- Group A (n=54): 12.5 [95%CI: 7.3, 17.7] (ES: moderate)

- Group B (n=32): 6.7 [95%CI: 0.5, 12.8] (ES: small)

- Group C (n=17): -1.18 [95%CI: -6.27, 2.64] (ES: small)

Time (p<0.01), Group (p<0.001), Group x Time (p<0.05)

**ΔDyspnea (mMRC score):**

- Total groups (n=90): -0.7 [95%CI: -1.0, -0.5] (ES: moderate)

- Group A (n=48): -0.9 [95%CI: -1.3, -0.6] (ES: moderate)

- Group B (n=26): -0.5 [95%CI: -1.0, -0.0] (ES: small)

- Group C (n=16): -0.6 [95%CI: -1.0, -0.1] (ES: moderate)

Time (p<0.001), Group NS, Group x Time NS

**ΔTLC (%pred):**

- Total groups (n=103): 4.9 [95%CI: 2.3, 7.6] (ES: small)

- Group A (n=54): 6.5 [95%CI: 2.7, 10.4] (ES: small)

- Group B (n=32): 5.8 [95%CI: 0.6, 10.9] (ES: small)

- Group C (n=17): -1.7 [95%CI: -6.9, 3.4] (ES: very small)

Time (p<0.05), Group (p<0.001), Group x Time (p<0.05)

**ΔFEV1 (%pred):**

- Total groups (n=103): 8.6 [95%CI: 5.2, 12.0] (ES: small)

- Group A (n=54): 12.16 [95%CI: 6.5, 17.8] (ES: moderate)

- Group B (n=32): 6.4 [95%CI: 1.4, 11.5] (ES: small)

- Group C (n=17): 1.5 [95%CI: -1.6, 4.5] (ES: small)

Time (p<0.001), Group (p<0.001), Group x Time (p<0.05)

**ΔFEV1/VC (%):**

- Total groups (n=103): -0.2 [95%CI: -2.4, 2.1] (ES: very small)

- Group A (n=54): -1.0 [95%CI: -5.0, 2.9] (ES: very small)

- Group B (n=32): -0.3 [95%CI: -2.6, 2.1] (ES: very small)

- Group C (n=17): 2.8 [95%CI: 0.06, 5.5] (ES: moderate)

Time NS, Group NS, Group x Time NS

**ΔDLCO (%pred):**

- Total groups (n=93): 6.2 [95%CI: 4.0, 8.4] (ES: moderate)

- Group A (n=48): 9.9 [95%CI: 6.7, 13.1] (ES: large)

- Group B (n=30): 3.8 [95%CI: 0.48, 7.1] (ES: small)

- Group C (n=15): -1.0 [95%CI: -5.9, 3.9] (ES: very small)

Time (p<0.001), Group (p<0.001), Group x Time (p<0.001)

**ΔPI<sub>max</sub> (%pred):**

- Total groups (n=98): 7.7 [95%CI: 3.4, 12.0] (ES: small)

- Group A (n=52): 6.3 [95%CI: 1.1, 11.5] (ES: small)

- Group B (n=31): 12.0 [95%CI: 1.7, 22.3] (ES: small)

- Group C (n=15): 3.7 [95%CI: -3.2, 10.6] (ES: small)

Time (p<0.01), Group £, Group x Time NS

**ΔPaO<sub>2</sub> (%pred):**

- Total groups (n=100): 4.0 [95%CI: 2.6, 5.5] (ES: moderate)

- Group A (n=51): 5.6 [95%CI: 3.7, 7.5] (ES: moderate)

- Group B (n=31): 3.7 [95%CI: 0.9, 6.5] (ES: small)

- Group C (n=18): 0.06 [95%CI: 3.4, -3.5] (ES: very small)

- Group A (n=42): -0.4 [95%CI: -0.9, 0.0] (ES: small)

- Group B (n=24): -0.6 [95%CI: -0.1, -0.1] (ES: small)

- Group C (n=15): -0.7 [95%CI: -1.6, 0.4] (ES: small)

Time (p<0.001), Group NS, Group x Time NS

**Δ"How strong is the pain that you experience?" (NRS):**

- Total groups (n=83): -0.8 [95%CI: -1.3, -0.2] (ES: small)

- Group A (n=44): -0.8 [95%CI: -1.6, 0.0] (ES: small)

- Group B (n=24): -0.5 [95%CI: -1.5, 0.6] (ES: very small)

- Group C (n=15): -1.1 [95%CI: -2.6, 0.3] (ES: small)

Time (p<0.05), Group (p<0.001), Group x Time NS

**ΔEQ5D 5 levels (Score 5-25):**

- Total groups (n=82): -2.4 [95%CI: -3.0, -1.9] (ES: large)

- Group A (n=42): -2.9 [95%CI: -3.7, -2.2] (ES: large)

- Group B (n=25): -2.0 [95%CI: -2.9, -1.1] (ES: large)

- Group C (n=15): -1.7 [95%CI: -3.4, -0.0] (ES: moderate)

Time (p<0.001), Group NS, Group x Time NS

**ΔEQ5D 5 levels VAS (Scale 0-100):**

- Total groups (n=83): 18 [95%CI: 15, 21] (ES: large)

- Group A (n=43): 21 [95%CI: 16, 26] (ES: large)

- Group B (n=24): 15 [95%CI: 8, 21] (ES: large)

- Group C (n=16): 16 [95%CI: 8, 24] (ES: large)

Time (p<0.001), Group (p<0.01), Group x Time NS

**ΔFatigue (score 0-10):**

- Total groups (n=81): -1.7 [95%CI: -2.1, -1.3] (ES: large)

- Group A (n µ): -2.1 [95%CI: -2.6, -1.7] (ES: large)

- Group B (n=24): -1.4 [95%CI: -2.2, -0.7] (ES: large)

- Group C (n=15): -0.9 [95%CI: -2.1, 0.3] (ES: small)

Time (p<0.001), Group (p<0.01), Group x Time (p<0.05)

**ΔDepression (score 0-27):**

- Total groups (n=78): -4.3 [95%CI: -5.1, -3.5] (ES: large)

- Group A (n=42): -4.8 [95%CI: -6.0, -3.7] (ES: large)

- Group B (n=23): -3.8 [95%CI: -5.4, -2.3] (ES: large)

- Group C (n=13): -3.2 [95%CI: -5.4, -1.2] (ES: large)

Time (p<0.001), Group NS, Group x Time NS

**ΔAnxiety (score 0-21):**

- Total groups (n=77): -2.4 [95%CI: -3.2, -1.6] (ES: moderate)

- Group A (n=40): -2.9 [95%CI: -4.1, -1.8] (ES: large)

- Group B (n=22): -2.5 [95%CI: -1.1, -0.7] (ES: moderate)

- Group C (n=15): -0.9 [95%CI: -3.3, 1.4] (ES: small)

Time (p<0.001), Group NS, Group x Time NS

**Post-rehabilitation subjective health changed compared to pre-rehabilitation (-7 = Very much worse, 0 =**

**Unchanged, +7 = Very much better):**

- Total group: 4.3±2.1 (range: -6-7)

- Group A: 5.2±1.5 (range: 0-7)

- Group B: 4.0±1.4 (range: -1-7)

- Group C: 2.8±2.2 (range: -6-6)

**Post-rehabilitation subjective health changed compared to pre-COVID-19 infection (-7 = Very much worse, 0 =**

**Unchanged, +7 = Very much better):**

- Total group: -1.6±3.6 (range: -7-7)

- Group A: -0.5±3.8 (range: -7-7)

- Group B: -1.9±2.5 (range: -5-5)

- Group C: -4.3±3.0 (range: -7-4)

(ES: very small)

Time NS, Group NS, Group x Time NS

**ΔBNP (pg/ml):**

- Total groups (n=61): -28.4 [95%CI: -100.1,

-43.2] (ES: very small)

- Group A (n=32): -50.7 [95%CI: -190.2, -

88.8] (ES: very small)

- Group B (n=18): -5.2 [95%CI: -20.4, 10.0]

(ES: very small)

- Group C (n=11): -1.6 [95%CI: -22.7, 19.4]

(ES: very small)

Time NS, Group NS, Group x Time £

**ΔD-dimer (ng/ml):**

- Total groups (n=69): -468 [95%CI: -735, -

202] (ES: small)

- Group A (n=41): -765 [95%CI: -1195, -

335] (ES: moderate)

- Group B (n=18): -20 [95%CI: -112, 71]

(ES: very small)

- Group C (n=10): -57 [95%CI: -147, 32]

(ES: small)

Time (p<0.01), Group (p<0.05), Group x

Time (p<0.01)

**ΔCRP (mg/ml):**

- Total groups (n=71): -1.8 [95%CI: -2.8,

0.8] (ES: small)

- Group A (n=39): -2.6 [95%CI: -4.2, 0.9]

(ES: moderate)

- Group B (n=21): -1.3 [95%CI: -2.8, 0.3]

(ES: small)

- Group C (n=11): 0.0 [95%CI: -1.2, 1.2]

(ES: very small)

Time (p<0.05), Group NS, Group x Time NS

Adherence and tolerability (n NR):

**"How effective was the rehabilitation**

**program for you?" (Scale 0-10):**

- Total groups: 8.3±2.0 (range: 0-10)

- Group A: 8.9±1.4 (range: 4-10)

- Group B: 7.8±1.6 (range: 4-10)

- Group C: 7.1±2.9 (range: 0-10)

One patient transferred to psychiatric hospital

due to an acute psychosocial crisis not

related to RP. One patient quitted RP because

of disc prolapse. One drop-out. All the other

105 patients participated at least 90% of RP

sessions.

|                           |                                                                                                                                                                                                                                                                                                                                                                                                                                                                                                                                 |                                                                                                                                                                                                                                                                                                                                                                                                                                                                                                                                                                                                                                                                                                                                                                                                                                                                                                                                                                                                                                                                                                                                                                                                                                                                                                                                               |                                                                                                                                                                                                                                                                                                                                                                                                                                                                                                                                                                                                                                                                               |                                                                                                                                                                                                                                                                                                                                                                                                                                                                                                                                                                                                                    |
|---------------------------|---------------------------------------------------------------------------------------------------------------------------------------------------------------------------------------------------------------------------------------------------------------------------------------------------------------------------------------------------------------------------------------------------------------------------------------------------------------------------------------------------------------------------------|-----------------------------------------------------------------------------------------------------------------------------------------------------------------------------------------------------------------------------------------------------------------------------------------------------------------------------------------------------------------------------------------------------------------------------------------------------------------------------------------------------------------------------------------------------------------------------------------------------------------------------------------------------------------------------------------------------------------------------------------------------------------------------------------------------------------------------------------------------------------------------------------------------------------------------------------------------------------------------------------------------------------------------------------------------------------------------------------------------------------------------------------------------------------------------------------------------------------------------------------------------------------------------------------------------------------------------------------------|-------------------------------------------------------------------------------------------------------------------------------------------------------------------------------------------------------------------------------------------------------------------------------------------------------------------------------------------------------------------------------------------------------------------------------------------------------------------------------------------------------------------------------------------------------------------------------------------------------------------------------------------------------------------------------|--------------------------------------------------------------------------------------------------------------------------------------------------------------------------------------------------------------------------------------------------------------------------------------------------------------------------------------------------------------------------------------------------------------------------------------------------------------------------------------------------------------------------------------------------------------------------------------------------------------------|
|                           |                                                                                                                                                                                                                                                                                                                                                                                                                                                                                                                                 | <p>Time (p&lt;0.001), Group (p&lt;0.05), Group x Time (p&lt;0.01)</p> <p><b>ΔPaCO<sub>2</sub> (mmHg):</b></p> <ul style="list-style-type: none"> <li>- Total groups (n=100): -0.1 [95%CI: -0.7, 0.4] (ES: very small)</li> <li>- Group A (n=51): 0.1 [95%CI: -0.7, 1.0] (ES: very small)</li> <li>- Group B (n=31): -0.8 [95%CI: -1.7, 0.1] (ES: very small)</li> <li>- Group C (n=18): 0.11 [95%CI: -1.4, 1.6] (ES: very small)</li> </ul> <p>Time NS, Group NS, Group x Time NS</p> <p><b>ΔRV (%pred):</b></p> <ul style="list-style-type: none"> <li>- Total groups (n=103): -0.28 [95%CI: -5.8, 5.2] (ES: very small)</li> <li>- Group A (n=54): -2.2 [95%CI: -10.5, 6.1] (ES: very small)</li> <li>- Group B (n=32): 3.4 [95%CI: -5.6, 12.3] (ES: very small)</li> <li>- Group C (n=17): -1.2 [95%CI: -15.8, 13.3] (ES: very small)</li> </ul> <p>Time NS, Group (p&lt;0.001), Group x Time NS</p> <p><b>ΔTotal specific airway resistance (%pred):</b></p> <ul style="list-style-type: none"> <li>- Total groups (n=103): -8.7 [95%CI: -6.3, 3.7] (ES: very small)</li> <li>- Group A (n=54): -14.2 [95%CI: -37.0, 8.6] (ES: very small)</li> <li>- Group B (n=32): 1.77 [95%CI: -9.4, 13.0] (ES: very small)</li> <li>- Group C (n=17): -11.0 [95%CI: -21.2, -0.7] (ES: moderate)</li> </ul> <p>Time NS, Group NS, Group x Time NS</p> |                                                                                                                                                                                                                                                                                                                                                                                                                                                                                                                                                                                                                                                                               |                                                                                                                                                                                                                                                                                                                                                                                                                                                                                                                                                                                                                    |
| Hermann et al., 2020 [50] | <p><b>6MWT (m):</b></p> <ul style="list-style-type: none"> <li>- Total group: 231±154 / 361±135<sup>S</sup> (Δ +130±78)</li> <li>- Ventilation+: 241±154 / 387±136*** (Δ +145±59)</li> <li>- Ventilation-: 223±158 / 342±135*** (Δ +119±90)</li> </ul> <p>Groups comparison: Ventilation+ = Ventilation- in pre- and post-RP and for Δ</p>                                                                                                                                                                                      | <p><b>SaO<sub>2</sub> (probably at rest) (%):</b></p> <ul style="list-style-type: none"> <li>- Total groups: 92.7±2.7 / 96.0±2.3<sup>#</sup></li> <li>- Ventilation+: 92.4±2.2 / 96.0±2.8<sup>#</sup></li> <li>- Ventilation-: 92.9±3.1 / 96.1±2.1<sup>#</sup></li> </ul> <p>Groups comparison: Ventilation+ = Ventilation- in pre- and post-RP</p> <p><b>Need for oxygen therapy (n in sample):</b></p> <ul style="list-style-type: none"> <li>- Total groups: 21 / 7<sup>#</sup></li> <li>- Ventilation+: 11 / 4<sup>#</sup></li> <li>- Ventilation-: 10 / 3<sup>#</sup></li> </ul> <p>Groups comparison: Ventilation+ = Ventilation- in pre- and post-RP</p>                                                                                                                                                                                                                                                                                                                                                                                                                                                                                                                                                                                                                                                                               | <p><b>Patients' feeling (points):</b></p> <ul style="list-style-type: none"> <li>- Total group: Δ = +40<sup>#</sup></li> <li>- Ventilation +: ↗</li> <li>- Ventilation -: ↘</li> </ul> <p>Groups comparison: Ventilation+ = Ventilation- in pre-RP and for Δ, Ventilation + &gt; Ventilation- (trend)</p>                                                                                                                                                                                                                                                                                                                                                                     | <p><u>Adherence and tolerability:</u></p> <p>No patient died, no dropout mentioned. Stated that the program was performed safely. All patients return back home without professional nursing support.</p>                                                                                                                                                                                                                                                                                                                                                                                                          |
| Imamura et al., 2021 [51] | <p><b>Muscle strength (score 1-60):</b> 44±8 / 51±7**</p> <p><b>SPPB (n=16) (score 0-12):</b> 5.9±1.2 / 8.8±2.1</p>                                                                                                                                                                                                                                                                                                                                                                                                             | <p><b>PI<sub>max</sub>, PE<sub>max</sub> (n=10): →</b></p>                                                                                                                                                                                                                                                                                                                                                                                                                                                                                                                                                                                                                                                                                                                                                                                                                                                                                                                                                                                                                                                                                                                                                                                                                                                                                    | <p><b>Ambulatory capacity (% of sample):</b></p> <ul style="list-style-type: none"> <li>- Non-functional gait / unable to walk: 52 / 30%<sup>#</sup></li> <li>- Walking dependent on continuous manual contact to support body weight: 11 / 0%<sup>#</sup></li> <li>- Gait dependent on intermittent or continuous manual contact: 19 / 4%<sup>#</sup></li> <li>- Walking under supervision or verbal guidance: 19 / 19%<sup>#</sup></li> <li>- Independent walking on level terrain, with supervision in other environments: 0 / 26%<sup>#</sup></li> <li>- Independent walking anywhere, including stairs: 0 / 22%<sup>#</sup></li> </ul> <p><b>Disability level:</b> ↘</p> | <p><u>Other:</u></p> <p><b>FFM (n=18), Body weight, BMI: →</b></p> <p><b>Dysphagia (% of sample):</b></p> <ul style="list-style-type: none"> <li>- No dysphagia: 48 / 70%<sup>#</sup></li> <li>- Mild dysphagia: 15 / 15%<sup>#</sup></li> <li>- Mild-Moderate dysphagia: 37 / 15%<sup>#</sup></li> </ul> <p><b>Malnutrition (% of sample, n=24):</b></p> <ul style="list-style-type: none"> <li>- No malnutrition: 4 / 46%<sup>#</sup></li> <li>- Moderate: 54 / 29%<sup>#</sup></li> <li>- Severe: 42 / 25%<sup>#</sup></li> </ul> <p><u>Adherence and tolerability:</u></p> <p><b>Adherence:</b> 85% (n=23)</p> |
| Li et al., 2021 [52]      | <p><i>Results only for n=13/16 patients who were breathing spontaneously</i></p> <p><i>Results analysed from raw data</i></p> <p><b>Walking distance (not a 6MWT) (m):</b> 21±15 / 49±3***</p> <p><b>Muscle strength (score 1-60):</b> 57±5 / 58±3<sup>‡</sup></p> <p><b>Physical function (score):</b> 9.3±2.1 / 10.7±1.5**</p> <p><b>Mobility (score):</b> 46.3±11.2/ 73.2±26.3***</p>                                                                                                                                        | <p><i>Results analysed from raw data</i></p> <p><b>PaO<sub>2</sub>/FiO<sub>2</sub> ratio, PI<sub>max</sub>, PI<sub>max</sub> (%pred), PEF, PEF (%pred):</b> ↗</p> <p><b>Dyspnea at rest:</b> ↘</p>                                                                                                                                                                                                                                                                                                                                                                                                                                                                                                                                                                                                                                                                                                                                                                                                                                                                                                                                                                                                                                                                                                                                            | <p><i>Results analysed from raw data</i></p> <p><b>Disability level:</b> ↘</p>                                                                                                                                                                                                                                                                                                                                                                                                                                                                                                                                                                                                | <p><u>Adherence and tolerability:</u></p> <p>No apparent dropout, no patient desaturated during or after either respiratory or mobility intervention, no adverse effects associated with physical therapist interventions.</p>                                                                                                                                                                                                                                                                                                                                                                                     |
| Martin et al., 2021 [53]  | <p><b>1-min STST (n rep):</b></p> <ul style="list-style-type: none"> <li>- COV+: 17.6±4.7 / NR<sup>#</sup> ( Δ  10 (range: 5-19))</li> <li>- CON: 13.6±7.6 / NR<sup>#</sup> ( Δ  5 (range: -4-11))</li> </ul> <p>Groups comparison: COV+ = CON in post-RP, COV+ &gt; CON for  Δ </p> <p><b>HR pre-STST (bpm):</b></p> <ul style="list-style-type: none"> <li>- COV+: 91±17 / NR<sup>#</sup></li> <li>- CON: 86±15 / NR<sup>#</sup></li> </ul> <p>Groups comparison: COV+ = CON in post-RP</p> <p><b>HR post-STST (bpm):</b></p> | <p><b>Dyspnea pre-STST (Borg scale):</b></p> <ul style="list-style-type: none"> <li>- COV+: 0 / NR<sup>#</sup> (range: 0-3)</li> <li>- CON: 2 / NR<sup>#</sup> (range: 0-5)</li> </ul> <p>Groups comparison: COV+ = CON in post-RP</p> <p><b>Dyspnea post-STST (Borg scale):</b></p> <ul style="list-style-type: none"> <li>- COV+: 5 / NR<sup>#</sup> (range: 3-8) ( Δ  +2.5 (range: -2-7))</li> <li>- CON: 5 / NR<sup>#</sup> (range: 1-10) ( Δ  +2 (range: 0-6))</li> </ul> <p>Groups comparison: COV+ = CON in post-RP and for  Δ </p> <p><b>SaO<sub>2</sub> pre-STST (%):</b></p> <ul style="list-style-type: none"> <li>- COV+: 95.1±1.9 / NR<sup>#</sup></li> </ul>                                                                                                                                                                                                                                                                                                                                                                                                                                                                                                                                                                                                                                                                    | N/A                                                                                                                                                                                                                                                                                                                                                                                                                                                                                                                                                                                                                                                                           | <p><u>Adherence and tolerability:</u></p> <p>One drop-out after first session for privacy reasons (not included in the final evaluation).</p>                                                                                                                                                                                                                                                                                                                                                                                                                                                                      |

|                                      |                                                                                                                                                                                                                                                                                                                                                                                                                                                                                                                                                                             |                                                                                                                                                                                                                                               |                                                                                                                                                                                                                                                                                                                                                                                                                                             |                                                                                                                                                                                                                                                                                                                                                                                                                                                                                                                                                                                                    |
|--------------------------------------|-----------------------------------------------------------------------------------------------------------------------------------------------------------------------------------------------------------------------------------------------------------------------------------------------------------------------------------------------------------------------------------------------------------------------------------------------------------------------------------------------------------------------------------------------------------------------------|-----------------------------------------------------------------------------------------------------------------------------------------------------------------------------------------------------------------------------------------------|---------------------------------------------------------------------------------------------------------------------------------------------------------------------------------------------------------------------------------------------------------------------------------------------------------------------------------------------------------------------------------------------------------------------------------------------|----------------------------------------------------------------------------------------------------------------------------------------------------------------------------------------------------------------------------------------------------------------------------------------------------------------------------------------------------------------------------------------------------------------------------------------------------------------------------------------------------------------------------------------------------------------------------------------------------|
|                                      | - COV+: 111±19 / NR <sup>#</sup> ( Δ  43±25)<br>- CON: 102±15 / NR <sup>#</sup> ( Δ  23±12)<br>Groups comparison: COV+ = CON in post-RP, COV+ > CON for  Δ                                                                                                                                                                                                                                                                                                                                                                                                                  | - CON: 94.8±1.9 / NR <sup>#</sup><br>Groups comparison: COV+ = CON in post-RP<br><b>SaO<sub>2</sub> post-STST (%):</b><br>- COV+: 91.8±3.3 / NR <sup>#</sup><br>- CON: 92.5±1.7 / NR <sup>#</sup><br>Groups comparison: COV+ = CON in post-RP |                                                                                                                                                                                                                                                                                                                                                                                                                                             |                                                                                                                                                                                                                                                                                                                                                                                                                                                                                                                                                                                                    |
| Mohamed et al., 2021 [54]            | N/A                                                                                                                                                                                                                                                                                                                                                                                                                                                                                                                                                                         | N/A                                                                                                                                                                                                                                           | <b>QoL:</b> ↗ (for the two groups)<br>Groups comparison: COV+ > CON in post-RP                                                                                                                                                                                                                                                                                                                                                              | <u>Biological parameters:</u><br><b>Lymphocytes, leukocytes:</b> ↗ (for the two groups)<br>Groups comparison: COV+ > CON in post-RP<br><b>IL-10:</b> ↗ (for the two groups)<br>Groups comparison: COV+ = CON<br><b>IL-6:</b><br>- COV+: ↗<br>- CON: →<br>Groups comparison: COV+ = CON<br><b>IgA-S:</b><br>- COV+: ↗<br>- CON: →<br>Groups comparison: COV+ > CON in post-RP<br><b>TNF-α:</b><br>- COV+: →<br>- CON: ↗<br>Groups comparison: COV+ = CON<br><br><u>Adherence and tolerability:</u><br><b>Drop-out:</b> n=3 for COV+ and n=2 for CON                                                 |
| Ozyemisci Taskiran et al., 2021 [55] | <i>Results provided only for n=5 patients in the COV+ group and n=9 patients in the CON group and only in post-RP</i><br><b>Muscle strength (score 1-60):</b><br>- COV+: median: 58 (range: 48-60)<br>- CON: median: 57 (range: 48-60)<br>Groups comparison: COV+ = CON<br><b>Handgrip (kg):</b><br>- COV+: median: 30 (range: 7-32)<br>- CON: median: 22 (range: 6-36)<br>Groups comparison: COV+ = CON<br><b>Restricted range of motion (n in sample):</b><br>- COV+: 1 (shoulder: n=1)<br>- CON: 2 (shoulder: n=1, finger flexion: n=1)<br>Groups comparison: COV+ = CON | N/A                                                                                                                                                                                                                                           | <i>Results provided only for n=5 patients in the COV+ group and n=9 patients in the CON group and only in post-RP</i><br><b>Physical function:</b> COV+ > CON <sup>£</sup><br><b>Pain, Role limitations-physical, Role limitations-emotional, Mental health, Social functioning, Energy, General health:</b> COV+ = CON<br><b>Tremor in the hands (n in sample):</b><br>- COV+: 2<br>- CON: 8<br>Groups comparison: COV+ < CON <sup>£</sup> | <u>Adherence and tolerability:</u><br><b>Mortality:</b><br>- COV+: n=8/18<br>- CON: n=5/17 <sup>µ</sup>                                                                                                                                                                                                                                                                                                                                                                                                                                                                                            |
| Pancera et al., 2021 [56]            | <i>Results analysed from raw data for n=6</i><br><b>T0 / T1 / T2</b><br><b>Muscle strength (score 0-60):</b> 51±2 / 55±3** / 59±2***<br><b>SPPB (score 0-12):</b> 1±3 / 9±5**** / 12±0****                                                                                                                                                                                                                                                                                                                                                                                  | <i>Results analysed from raw data for n=6</i><br><b>PI<sub>max</sub>:</b> →<br><b>PE<sub>max</sub>:</b> ↗ <sup>£</sup>                                                                                                                        | <i>Results analysed from raw data for n=6</i><br><b>QoL:</b> ↗<br><b>Disability level:</b> ↘                                                                                                                                                                                                                                                                                                                                                | <i>Results analysed from raw data for n=6</i><br><u>Other:</u><br><b>BMI, Quadriceps girth left and right:</b> ↗<br><br><u>Adherence and tolerability:</u><br><b>Drop-out:</b> one patient discharged early because of an acute gallbladder problem unrelated to the RP (not included in results).<br><br><u>Other:</u><br>80% of patients discharged at home, 9% were discharged to a skilled nursing facility or subacute rehabilitation facility, 6% required medical transfer off the unit to an acute medical floor, 5% were transferred to another unit/hospital for further rehabilitation. |
| Patel et al., 2021 [57]              | <b>ΔDistance ambulated (m):</b> +224 [95%CI: 172, 276]*** (ES: large)                                                                                                                                                                                                                                                                                                                                                                                                                                                                                                       | <b>Could breathe on room air (% of sample):</b> 68 / 81% <sup>#</sup><br><b>Need for oxygen on exertion (% of sample):</b> 23 / 14% <sup>#</sup>                                                                                              | <b>AMPAC for basic mobility and daily activities:</b> ↗<br>Groups comparison: intubated patients > non-intubated patients for Δ, patients receiving psychotherapy > patients without psychotherapy for ΔAMPAC for daily activities and trend for ΔAMPAC for basic mobility<br><b>Ambulatory status (% of sample):</b> 66 / 92% <sup>#</sup>                                                                                                 |                                                                                                                                                                                                                                                                                                                                                                                                                                                                                                                                                                                                    |
| Piquet et al., 2021 [58]             | Groups comparison: ICU+ = ICU-, LONG+ (>14 days in acute care, n=50) = LONG- (<14 days in acute care, n=50) in all pre-RP measures                                                                                                                                                                                                                                                                                                                                                                                                                                          | <b>Respiratory rate pre-STST, SaO<sub>2</sub> pre- and post-STST:</b> →                                                                                                                                                                       | <b>Disability level (n=89):</b> ↘<br>Groups comparison: ICU+ = ICU-, LONG+ = LONG- in pre-RP                                                                                                                                                                                                                                                                                                                                                | <u>Adherence and tolerability:</u> no information<br><u>Correlations:</u><br>- Positive correlation between disability level and STST frequency (n=51) at admission                                                                                                                                                                                                                                                                                                                                                                                                                                |



|                                    |                                                                                                                                                                                                                                                                                                                                                                                                                                                                                                                                                                                                                                                                                                                                                                  |                                                                                                                                                                                                                                                                                                                         |                                                                                                                                                                                                                                                                                              |                                                                                                                                                                                                                                                                                                                                                                                                                                                                                                                                                                                                                                                                                      |
|------------------------------------|------------------------------------------------------------------------------------------------------------------------------------------------------------------------------------------------------------------------------------------------------------------------------------------------------------------------------------------------------------------------------------------------------------------------------------------------------------------------------------------------------------------------------------------------------------------------------------------------------------------------------------------------------------------------------------------------------------------------------------------------------------------|-------------------------------------------------------------------------------------------------------------------------------------------------------------------------------------------------------------------------------------------------------------------------------------------------------------------------|----------------------------------------------------------------------------------------------------------------------------------------------------------------------------------------------------------------------------------------------------------------------------------------------|--------------------------------------------------------------------------------------------------------------------------------------------------------------------------------------------------------------------------------------------------------------------------------------------------------------------------------------------------------------------------------------------------------------------------------------------------------------------------------------------------------------------------------------------------------------------------------------------------------------------------------------------------------------------------------------|
|                                    | <p><b>10-rep STST (s) (n=51):</b> 30.7±3.5 / 28.7±9.3**</p> <p><b>STST Frequency x100 (Hz) (n=51):</b> 26.9±15.1 / 36.9±15.1*** (Δ +37%)</p> <p><b>HR pre-STST (bpm) (n=50):</b> 88±16 / 90±17</p> <p><b>HR post-STST (bpm) (n=50):</b> 103±21 / 103±21</p> <p><b>RPE pre-STST (Borg scale) (n=37):</b> 0.7±1.4 / 0.2±0.7</p> <p><b>RPE post-STST (Borg scale) (n=37):</b> 3.0±2.3 / 2.1±1.5* (Δ -30%)</p> <p><b>Handgrip left (kg):</b> 17.0±9.8 / 20.1±9.2***</p> <p><b>Handgrip right (kg):</b> 19.2±9.9 / 21.9±9.6*** (Δ +15%)</p> <p><b>Mean handgrip (left+right) (kg):</b> 18.1±9.8 / 20.9±9.5***</p> <p>Groups comparison: ICU+ &gt; ICU- for Δ</p> <p>At discharge, mean grip strength remained 10% below normal values in that age range.</p>          | <p><b>Respiratory rate post-STST:</b> ∩</p> <p><b>Need for oxygen therapy (% of sample):</b> 58 / 3%#</p>                                                                                                                                                                                                               |                                                                                                                                                                                                                                                                                              | <p>(p&lt;0.001<sup>u</sup>) and at discharge (p&lt;0.001<sup>u</sup>)</p> <p>- Negative correlation between disability level and handgrip (n=48) at admission (p&lt;0.01<sup>u</sup>) and at discharge (p&lt;0.01<sup>u</sup>)</p> <p>- Negative correlation between handgrip and days spent in ICU (n=16) at admission (trend<sup>u</sup>) and at discharge (p&lt;0.05<sup>u</sup>)</p> <p>- Negative correlation between handgrip and RPE post-STST at discharge (p&lt;0.05)</p> <p><u>Adherence and tolerability:</u></p> <p>Death of 2 subjects. 79% of discharges home or to a relative's home, 15% of transfers to a COVID-free unit for further inpatient rehabilitation.</p> |
| Puchner et al., 2021 [59]          | <p><b>6MWT (m):</b> 323±196 / 499±103*** (Δ +176±137)</p>                                                                                                                                                                                                                                                                                                                                                                                                                                                                                                                                                                                                                                                                                                        | <p><b>FVC, FEV1, TLC, DLCO, P<sub>I</sub>max:</b> ↗</p> <p><b>FEV1/FVC:</b> ∩</p> <p><b>RV:</b> ↗<sup>£</sup></p> <p><b>pH:</b> ∩<sup>£</sup></p> <p><b>PaO<sub>2</sub>, PaCO<sub>2</sub>:</b> →</p>                                                                                                                    | <b>Disability level:</b> ∩                                                                                                                                                                                                                                                                   | <p><u>Adherence and tolerability:</u></p> <p>No information but 7 patients excluded due to missing data.</p>                                                                                                                                                                                                                                                                                                                                                                                                                                                                                                                                                                         |
| Rodriguez-Blanco et al., 2021 [60] | <p><b>6MWT (m):</b></p> <p>- COV+: 440±164 / 520±135* (Δ +80±126)</p> <p>- CON: 380±129 / 380±136 (Δ 0±26)</p> <p>Groups comparison: COV+ = CON in pre- and post-RP, COV+ &gt; CON for Δ</p> <p><b>30-s STST (n rep):</b></p> <p>- COV+: 12.3±4.8 / 13.8±5.7* (Δ +1.5±2.2)</p> <p>- CON: 10.5±2.3 / 9.9±2.0* (Δ -0.6±0.9)</p> <p>Groups comparison: COV+ &gt; CON in pre- and post-RP and for Δ</p> <p><b>RPE post-30-s STST (Borg scale):</b></p> <p>- COV+: 4.8±1.7 / 2.6±0.9*** (Δ -2.2±1.3)</p> <p>- CON: 4.8±1.8 / 4.8±1.5 (Δ +0.1±1.3)</p> <p>Groups comparison: COV+ = CON in pre-RP, COV+ &gt; CON in post-RP and trend for Δ</p> <p>No difference between females and males subjects for the two groups (details of data are available in article).</p> | N/A                                                                                                                                                                                                                                                                                                                     | N/A                                                                                                                                                                                                                                                                                          | <p><u>Adherence and tolerability:</u></p> <p><b>Adherence:</b> 90%</p> <p>Program found effective, safe, and feasible</p>                                                                                                                                                                                                                                                                                                                                                                                                                                                                                                                                                            |
| Saeki et al., 2021 [61]            | <p><i>Results analysed from raw data for parameters assessed in all subjects (n=4)</i></p> <p><b>6MWT (m) from 1 mo to 6 mo:</b> 491±44 / 542±31*</p> <p><b>Muscle strength (score 1-60) from ICU discharge to 6 mo:</b> 52±3 / 57±3* / 60±1*** / 60±0***</p> <p><b>Gait speed (m/s) from hospital discharge to 6 mo:</b> 1.0±0.2 / 1.4±0.1 / 2.2±0.8*</p> <p><b>Handgrip right (kg) from 1 mo to 6 mo:</b> 23.8±10.6 / 33.9±5.6</p> <p><b>Handgrip left (kg) from 1 mo to 6 mo:</b> 24.9±4.0 / 31.6±6.8*</p>                                                                                                                                                                                                                                                    | <b>SaO<sub>2</sub> pre- and post-6MWT from 1 mo to 6 mo:</b> →                                                                                                                                                                                                                                                          | <b>Disability level from ICU discharge to 6 mo:</b> ∩ (all patients achieved 100 (BI score) from 1 mo after hospital discharge)                                                                                                                                                              | <u>Adherence and tolerability:</u> no information                                                                                                                                                                                                                                                                                                                                                                                                                                                                                                                                                                                                                                    |
| Spielmanns et al., 2021 a [62]     | N/A                                                                                                                                                                                                                                                                                                                                                                                                                                                                                                                                                                                                                                                                                                                                                              | N/A                                                                                                                                                                                                                                                                                                                     | Groups comparison for <b>Disability level:</b> COV+ < COV- in pre-RP, COV+ = COV- in post-RP, COV+ < COV- for Δ # for pre vs post-RP                                                                                                                                                         | <u>Adherence and tolerability:</u>                                                                                                                                                                                                                                                                                                                                                                                                                                                                                                                                                                                                                                                   |
| Spielmanns et al., 2021 b [63]     | <p><b>6MWT (m):</b></p> <p>- COV+: 176±141 / 357±132***** (Δ +180±101)</p> <p>- COV-: 210±128 / 312±126***** (Δ +102±89)</p> <p>Groups comparison: COV+ &lt; COV- in pre-RP, COV+ &gt; COV- in post-RP and for Δ</p>                                                                                                                                                                                                                                                                                                                                                                                                                                                                                                                                             | N/A                                                                                                                                                                                                                                                                                                                     | <p><b>Disability level:</b> ∩ (for the two groups)</p> <p>Groups comparison: COV+ = COV- in pre-RP, COV+ &lt; COV- in post-RP, COV+ &gt; COV- for Δ</p> <p><b>Wellbeing:</b> ↗ (for the two groups)</p> <p>Groups comparison: COV+ = COV- in pre-RP, COV+ &gt; COV- in post-RP and for Δ</p> | <u>Adherence and tolerability:</u> no information                                                                                                                                                                                                                                                                                                                                                                                                                                                                                                                                                                                                                                    |
| Stavrou et al., 2021 [64]          | <p><b>6MWT (m):</b> 434±102 / 519±95***</p> <p><b>6MWT (%pred):</b> 84±17 / 99±11***</p> <p><b>VO<sub>2peak</sub> estimated from 6MWT (ml/min/kg):</b> 14.9±2.4 / 16.9±2.2***</p> <p><b>Metabolic equivalent estimated from 6MWT (METs):</b> 4.3±0.7 / 4.8±0.6***</p> <p><b>HR pre-6MWT (bpm):</b> 77±16 / 78±12</p> <p><b>HR post-6MWT (bpm):</b> 111±19 / 107±17<sup>u</sup></p>                                                                                                                                                                                                                                                                                                                                                                               | <p><b>Dyspnea pre-6MWT:</b> →</p> <p><b>Dyspnea post-6MWT:</b> ∩</p> <p><b>FVC, FEV1, DLCO (%pred):</b> →</p> <p><b>Chest circumference difference between maximal inhalation and exhalation:</b> ↗</p> <p><b>SaO<sub>2</sub> pre- and post-6MWT:</b> →</p> <p><b>SaO<sub>2</sub> 1min post-6MWT:</b> ∩<sup>u</sup></p> | <b>Sleep quality:</b> ↗                                                                                                                                                                                                                                                                      | <p><u>Biological parameters:</u></p> <p><b>Plasma oxydant capacity:</b> ↗</p> <p><b>ROS:</b> →</p> <p><u>Other:</u></p> <p><b>BMI, FM, Visceral fat, Neck circumference:</b> ∩</p>                                                                                                                                                                                                                                                                                                                                                                                                                                                                                                   |

|                          |                                                                                                                                                                                                                                                                                                                                                                                                                                                                                                                                                                                                                                                                                                                                                                                                                                                                                                                                                                                                                                                                                                                                                     |                                                                                                                                                                                                                                                                                                                                                                                                                                                                                                                                                                                                                                                                                                                          |                                                                                                                                                                                                                                                                                                                                                                                                                                                                                                                                                                                                                                                                                                                                                                                                                                                                                                                                                                                       |                                                                                                                                                                                                                                                                                                                                                                                                                                                                                                                                                                                                                                                                                                                                                 |
|--------------------------|-----------------------------------------------------------------------------------------------------------------------------------------------------------------------------------------------------------------------------------------------------------------------------------------------------------------------------------------------------------------------------------------------------------------------------------------------------------------------------------------------------------------------------------------------------------------------------------------------------------------------------------------------------------------------------------------------------------------------------------------------------------------------------------------------------------------------------------------------------------------------------------------------------------------------------------------------------------------------------------------------------------------------------------------------------------------------------------------------------------------------------------------------------|--------------------------------------------------------------------------------------------------------------------------------------------------------------------------------------------------------------------------------------------------------------------------------------------------------------------------------------------------------------------------------------------------------------------------------------------------------------------------------------------------------------------------------------------------------------------------------------------------------------------------------------------------------------------------------------------------------------------------|---------------------------------------------------------------------------------------------------------------------------------------------------------------------------------------------------------------------------------------------------------------------------------------------------------------------------------------------------------------------------------------------------------------------------------------------------------------------------------------------------------------------------------------------------------------------------------------------------------------------------------------------------------------------------------------------------------------------------------------------------------------------------------------------------------------------------------------------------------------------------------------------------------------------------------------------------------------------------------------|-------------------------------------------------------------------------------------------------------------------------------------------------------------------------------------------------------------------------------------------------------------------------------------------------------------------------------------------------------------------------------------------------------------------------------------------------------------------------------------------------------------------------------------------------------------------------------------------------------------------------------------------------------------------------------------------------------------------------------------------------|
|                          | <p>HR 1min post-6MWT (bpm): 90±16 / 88±16<br/> HR 4e and 5e min of 6MWT: pre-RP &gt; post-RP<sup>‡</sup><br/> HR (%pred<sup>‡</sup>): 71±11 / 67±11*<br/> SBP pre-6MWT (mmHg): 139±16 / 129±9**<br/> SBP post-6MWT (mmHg): 160±14 / 152±12*<br/> SBP 1min post-6MWT (mmHg): 142±12 / 138±8<br/> DBP pre-6MWT (mmHg): 84±16 / 84±9<br/> DBP post-6MWT (mmHg): 88±13 / 88±12<br/> DBP 1min post-6MWT (mmHg): 83±12 / 83±9<br/> Lower extremity fatigue pre-6MWT (Borg scale): 0.3±0.8 / 0.1±0.6<br/> Lower extremity fatigue post-6MWT (Borg scale): 1.0±0.8 / 0.8±0.6<br/> 30-s STST (n rep): 11.4±3.2 / 14.1±2.7***<br/> HR difference pre/post 30-s STST (bpm): 24±11 / 24±15<br/> Handgrip (kg): 31.9±10.2 / 33.2±9.8</p>                                                                                                                                                                                                                                                                                                                                                                                                                         | <p>SaO<sub>2</sub> 4e min of 6MWT: pre-RP &lt; post-RP<br/> SaO<sub>2</sub> difference pre/post 30-s STST: 1.7±1.3 / 1.5±2.3*</p>                                                                                                                                                                                                                                                                                                                                                                                                                                                                                                                                                                                        |                                                                                                                                                                                                                                                                                                                                                                                                                                                                                                                                                                                                                                                                                                                                                                                                                                                                                                                                                                                       | <p>Muscle mass: ↗<br/> Body surface area, Rest metabolic rate, Circumference differences between right and left Arm, Thigh, and Calf: →</p> <p>Adherence and tolerability:<br/> Drop-out: n=6 (initially 26 subjects)</p>                                                                                                                                                                                                                                                                                                                                                                                                                                                                                                                       |
| Steere et al., 2021 [65] | NR                                                                                                                                                                                                                                                                                                                                                                                                                                                                                                                                                                                                                                                                                                                                                                                                                                                                                                                                                                                                                                                                                                                                                  | NR                                                                                                                                                                                                                                                                                                                                                                                                                                                                                                                                                                                                                                                                                                                       | N/A                                                                                                                                                                                                                                                                                                                                                                                                                                                                                                                                                                                                                                                                                                                                                                                                                                                                                                                                                                                   | Adherence and tolerability: no information                                                                                                                                                                                                                                                                                                                                                                                                                                                                                                                                                                                                                                                                                                      |
| Sun et al., 2021 [66]    | <p><i>Baseline (n=31) / 2 wk (n=29) / 3 wk (n=31)</i><br/> <b>Elevate legs in bed (n in sample):</b><br/> - Can: n=27 / n=28 / n=31<br/> - Can't: n=4 / n=1 / n=0<br/> Baseline vs 2 wk NS<sup>‡</sup>, Baseline vs 3 wk*<sup>‡</sup><br/> <b>Stand and sit by yourself (n in sample):</b><br/> - Can: n=27 / n=28 / n=31<br/> - Can't: n=4 / n=1 / n=0<br/> Baseline vs 2 wk NS<sup>‡</sup>, Baseline vs 3 wk*<sup>‡</sup><br/> <b>Wear clothes by yourself (n in sample):</b><br/> - Can: n=19 / n=28 / n=31<br/> - Can't (short of breath slightly): n=7 / n=0 / n=0<br/> - Can't (short of breath significantly): n=5 / n=1 / n=0<br/> Baseline vs 2 wk**<sup>‡</sup>, Baseline vs 3 wk***<sup>‡</sup><br/> <b>Wear shoes by yourself (n in sample):</b><br/> - Can: n=21 / n=28 / n=31<br/> - Can't: n=10 / n=1 / n=0<br/> Baseline vs 2 wk***<sup>‡</sup>, Baseline vs 3 wk***<sup>‡</sup><br/> <b>Go to the toilet by yourself (n in sample):</b><br/> - Can: n=31 / n=29 / n=31 <sup>#</sup><br/> - Can't: n=0 / n=0 / n=0 <sup>#</sup><br/> <i>Details on statistical analysis between 2 wk and 3 wk are available in the article.</i></p> | <p><b>Dyspnea, Oxygen intake:</b> ↘<br/> <b>SaO<sub>2</sub>:</b> ↗<br/> <b>Need for oxygen therapy, Whitish sputum:</b> ↘</p> <p><i>Baseline (n=31) / 2 wk (n=29) / 3 wk (n=31)</i><br/> <b>Productive cough (n in sample):</b><br/> - Easy: 6 / n=3 / NR<br/> - Difficult: 3 / 2 / NR<br/> - Can't cough phlegm: 8 / 1 / NR<br/> Baseline vs 2 wk**<sup>‡</sup><br/> <b>When feel shortness breath (n in sample):</b><br/> - Prostration: 1 / 0 / 0<br/> - Stroll: 12 / 3 / 0<br/> - Scoot: 17 / 26 / 31<br/> - No shortness breath: 1 / 0 / 0<br/> Baseline vs 2 wk**<sup>‡</sup>, Baseline vs 3 wk***<sup>‡</sup><br/> <i>Details on statistical analysis between 2 wk and 3 wk are available in the article.</i></p> | <p><i>Baseline (n=31) / 2 wk (n=29) / 3 wk (n=31)</i><br/> <b>Sleep quality (n in sample):</b><br/> - Good: 5 / 6 / 24<br/> - Wake up 1-2 times a night: 23 / 23 / 7<br/> - Can't sleep: 3 / 0 / 0<br/> Baseline vs 2 wk NS<sup>‡</sup>, Baseline vs 3 wk***<sup>‡</sup><br/> <b>Effect of cough on life (n in sample):</b><br/> - No effect: 15 / 7 / 1<br/> - Marginal effect: 8 / 22 / 30<br/> - Serious effect: 8 / 0 / 0<br/> Baseline vs 2 wk NS<sup>‡</sup>, Baseline vs 3 wk NS<sup>‡</sup><br/> <b>When feel fatigue (n in sample):</b><br/> - Walk: 25 / 28 / 31<br/> - Go to the toilet: 6 / 1 / 0<br/> Baseline vs 2 wk<sup>‡</sup>, Baseline vs 3 wk NS<sup>‡</sup><br/> <b>Whether palpitate (n in sample):</b><br/> - Never: 10 / 22 / 29<br/> - Seldom: 20 / 7 / 2<br/> - Usually: 1 / 0 / 0<br/> Baseline vs 2 wk**<sup>‡</sup>, Baseline vs 3 wk***<sup>‡</sup><br/> <i>Details on statistical analysis between 2 wk and 3 wk are available in the article.</i></p> | <p><b>Biological parameters:</b><br/> <i>Baseline vs 2 wk</i><br/> <b>Lymphocytes, ALB, Total cholesterol:</b> ↗<br/> <b>Neutrophils, CRP, Procalcitonin:</b> ↘<br/> <b>WBC, RBC, Hemoglobin, Triglycerids:</b> →<br/> <i>Baseline vs 3 wk</i><br/> <b>RBC, Hemoglobin, Lymphocytes, ALB, Total cholesterol:</b> ↗<br/> <b>Neutrophils, CRP:</b> ↘<br/> <b>Procalcitonin:</b> ↘<sup>‡</sup><br/> <b>WBC, Triglycerids:</b> →<br/> <i>Details on statistical analysis between 2 wk and 3 wk are available in the article.</i></p> <p><b>Others:</b><br/> <i>Baseline (n=31) / 2 wk (n=29) / 3 wk (n=31)</i><br/> <b>Dietary habits (n in sample):</b><br/> - As usual: 28 / 28 / 1<sup>‡</sup><br/> - Less than usual: 3 / 1 / 0<sup>‡</sup></p> |
| Tozato et al., 2021 [67] | <p><b>6MWT (m):</b> 396±82 / 604±78*<br/> <b>Handgrip right (kg):</b> 20.4±8.8 / 26.9±2.8<br/> <b>Handgrip left (kg):</b> 18.6±6.9 / 25.2±4.2<sup>‡</sup><br/> <b>HR<sub>max</sub> during 6MWT (bpm):</b> 131±16 / 148±14<br/> <b>RPE<sub>max</sub> during 6MWT (Borg scale):</b> 4.8±2.2 / 3.0±2.2<br/> <b>Double product at rest (HR x SBP):</b> 12.1±1.3 / 9.9±2.0*<br/> <b>IRM knee extension right and left (kg):</b> 7.3±5.3 / 15.5±7.1*<br/> <b>IRM shoulder abduction right (kg):</b> 1.7±0.9 / 2.6±0.5*<br/> <b>IRM shoulder abduction left (kg):</b> 1.6±0.9 / 2.4±0.5<br/> <b>IRM elbow flexion right (kg):</b> 2.2±0.7 / 3.6±1.1<sup>‡</sup><br/> <b>IRM elbow flexion left (kg):</b> 2.1±0.5 / 3.4±0.8<sup>‡</sup></p>                                                                                                                                                                                                                                                                                                                                                                                                                 | SaO <sub>2min</sub> during 6MWT: →                                                                                                                                                                                                                                                                                                                                                                                                                                                                                                                                                                                                                                                                                       | N/A                                                                                                                                                                                                                                                                                                                                                                                                                                                                                                                                                                                                                                                                                                                                                                                                                                                                                                                                                                                   | Adherence and tolerability: no information                                                                                                                                                                                                                                                                                                                                                                                                                                                                                                                                                                                                                                                                                                      |
| Udina et al., 2021 [68]  | <p><b>6MWT (m) (n=22):</b> 159±154 / 346±112***<br/> <b>SPPB (score 0-12):</b><br/> - Total groups: 5.4±2.7 / NR<sup>‡</sup> (Δ +3.7±2.1)<br/> - ICU+: 5.5±2.8 / NR<sup>‡</sup> (Δ +4.4±2.1)<br/> - ICU-: 5.3±2.6 / NR<sup>‡</sup> (Δ +2.5±1.7)<br/> Groups comparison: ICU- &lt; ICU+ for Δ<br/> <b>SPPB Balance (score 0-4):</b><br/> - Total groups: 2.8±1.3 / NR<sup>‡</sup> (Δ +0.8±1.1)</p>                                                                                                                                                                                                                                                                                                                                                                                                                                                                                                                                                                                                                                                                                                                                                   | N/A                                                                                                                                                                                                                                                                                                                                                                                                                                                                                                                                                                                                                                                                                                                      | <p><b>Disability level:</b> ↘ (for the two groups, NS for groups comparison for Δ)<br/> <b>Delirium:</b> although none of the patient had delirium at admission, post-COVID-19 cognitive function was mildly impaired in the whole cohort and within both groups</p>                                                                                                                                                                                                                                                                                                                                                                                                                                                                                                                                                                                                                                                                                                                  | <p><b>Adherence and tolerability:</b><br/> No death during the intervention and all were discharge home</p>                                                                                                                                                                                                                                                                                                                                                                                                                                                                                                                                                                                                                                     |

- ICU+: 2.7±1.3 / NR<sup>§</sup> (Δ +1.1±1.2)  
 - ICU-: 3.1±1.2 / NR (Δ +0.4±0.7)  
 Groups comparison: ICU- < ICU+ (trend) for Δ

**SPPB Gait speed (m/s):**

Total groups: 0.5±0.2 / NR<sup>§</sup> (Δ +0.3±0.2)  
 - ICU+: 0.5±0.3 / NR<sup>§</sup> (Δ +0.4±0.2)  
 - ICU-: 0.5±0.2 / NR<sup>§</sup> (Δ +0.2±0.1)

Groups comparison: ICU- < ICU+ for Δ

**SPPB Chair stand (s):**

- Total groups: 35.4±21.4 / NR<sup>§</sup> (Δ -14.1±16.9)  
 - ICU+: 33.7±21.1 / NR<sup>§</sup> (Δ -15.3±16.9)  
 - ICU-: 38.1±22.3 / NR<sup>§</sup> (Δ -12.2±17.6)

Groups comparison: ICU- = ICU+ for Δ

**Standing balance on a single leg (n in sample maintaining 10s):**

- Total groups: n=3 / n=13<sup>§</sup>  
 - ICU+: n=1 / n=10<sup>§</sup>  
 - ICU-: n=2 / n=1

Groups comparison: NR

**Unassisted gait (n in sample):**

- Total groups: n=19 / n=33<sup>§</sup>  
 - ICU+: n=13 / n=20<sup>§</sup>  
 - ICU-: n=6 / n=13<sup>§</sup>

Groups comparison: NR

|                            |                                                                                           |     |                            |                                                                                                                                                       |
|----------------------------|-------------------------------------------------------------------------------------------|-----|----------------------------|-------------------------------------------------------------------------------------------------------------------------------------------------------|
| Zampogna et al., 2021 [69] | <b>6MWT (m) (n=42):</b> 229±103 / 328±98*** <sup>μ</sup> (for n=81 at discharge: 298±117) | N/A | <b>Disability level:</b> ∟ | <u>Adherence and tolerability:</u><br>31% of patients in level A, 62% shifted from level A to level B, 7% in level B (70% of adherence in this level) |
|                            | <b>6MWT (%pred) (n=42):</b> 48±19 / 68±15%*** <sup>μ</sup>                                |     |                            |                                                                                                                                                       |
|                            | <b>SPPB (score 0-12):</b> 3.2±3.7 / 6.9±3.8 <sup>§</sup>                                  |     |                            |                                                                                                                                                       |

%pred: percentage of predicted value, 10MWT: 10-minute walk test, 6MWT: 6-minute walk test, 95%CI: 95% confidence interval, ALB: albumin, AMPAC: activity measure for post-acute care 6 clicks, ASM: appendicular skeletal muscle mass, BI: Barthel index, BMI: body mass index, BNP: brain natriuretic peptide, bpm: beats per minute, CO<sub>2</sub>: carbon dioxide, CON: controlled group (COVID-19 subjects who didn't performed rehabilitation program), COV+: COVID-19 subjects who performed rehabilitation program, COV-: subjects without COVID-19 infection who performed rehabilitation program, CPET: cardiopulmonary exercise test, CRP: C-reactive protein, DLCO: diffusing capacity for carbon monoxide, DBP: diastolic blood pressure, EI: independent exercise group, EQ5D: EuroQol questionnaire - 5 dimensions, ES: effect size, ESWT: endurance shuttle walking test, f: female subjects, FAC: Functional ambulatory category, FEV1: forced expiratory volume in 1 second, FFM: fat-free mass, Fi: fraction of inspired gas, FIM: functional independence measure, FM: fat mass, FVC: forced vital capacity, HPT: home in-person physical therapy group, HR: heart rate, ICU: intensive care unit, IL: interleukine, Ig: immunoglobulin, IQR: interquartile range, KCO: carbon monoxide transfer coefficient, LDH: lactate dehydrogenase, m: male subjects, min: minute, mMRC: modified Medical Research Council, mo: month, MRC: Medical Research Council, N/A: not applicable, NR: not reported, NRS: numerical rating scale, O<sub>2</sub>: oxygen, Pa: partial pressure of a gas, PEF: peak expiratory flow, PE<sub>max</sub>: maximal expiratory pressure, PI<sub>max</sub>: maximal inspiratory pressure, QoL: quality of life, rep: repetition, RBC: red blood cells, RM: repetition maxima, ROS: reactive oxygen species, RP: rehabilitation program, RPE: rating of perceived exertion, RV: residual volume, s: second, SaO<sub>2</sub>: oxygen saturation, SBP: systolic blood pressure, SF-36: short form 36 health survey questionnaire, SPPB: short physical performance battery, STST: sit-to-stand test, TLC: total lung capacity, TNF-α: Tumor Necrosis Factor-alpha, VAS: visual analog scale, VC: vital capacity, VPT: virtual physical therapy group, WBC: white blood cell, wk: week. Δ: change between pre-rehabilitation program and post-rehabilitation program, <sup>μ</sup>: unclear, NS: no significant difference, <sup>‡</sup>p<0.1, \* p<0.05, \*\*p<0.01, \*\*\*p<0.001, \*\*\*\*p<0.0001, <sup>§</sup>significant but no p-value *versus* T0 (pre-RP measure), <sup>#</sup> no apparent statistics, >: significantly higher, < significantly lower, =: no statistical difference between groups. Effect size (d de Cohen's): <0.2 = very small, <0.5 = small, <0.8 = moderate, ≥0.8 = large.
